# Supplementary material for: A heteroditopic NHC and phosphine ligand supported ruthenium(ii)-complex: an effective catalyst for the N-alkylation of amides using alcohols
Source: Royal Society of Chemistry journal article supplement (doi:10.1039/d2cy00544a), 2022-01-01
Supplement: d2cy00544a1.pdf [file d2cy00544a1.pdf]

## Supporting Information

# A Heteroditopic NHC and Phosphine Ligand Supported Ruthenium(II)-Complex: Effective Catalyst for the N-alkylations of Amides using Alcohols

S. N. R. Donthireddy, Vivek Kumar Singh, and Arnab Rit\*

Department of Chemistry, Indian Institute of Technology Madras, Chennai 600036, India

### Table of contents:

General experimental details

General procedure for amide N-alkylation reaction

General procedure for the selective N-monoalkylation of 4-aminobenzamide

General procedure for the unsymmetrical N-dialkylation of 4-aminobenzamide

Procedure for the calculation of TON for N-alkylation reaction

Optimization studies

NMR characterization data of the isolated compounds

$^1\text{H}$  and  $^{13}\text{C}\{^1\text{H}\}$  NMR spectra of the isolated compounds from catalytic runs

Mechanistic details

## General experimental details

All manipulations were performed under an argon/N<sub>2</sub> atmosphere using either standard Schlenk line or glovebox techniques. All glassware was oven-dried at 130 °C overnight prior to use. The solvents used were dried, distilled, and degassed by standard methods and stored over 4 Å molecular sieves. NMR measurements were performed using Bruker 400 and 500 MHz FT-NMR spectrometers. The chemical shifts in the <sup>1</sup>H NMR spectra were referenced to the residual proton signals of the deuterated solvents (CDCl<sub>3</sub>, <sup>1</sup>H 7.26 ppm and <sup>13</sup>C{<sup>1</sup>H} 77.16 ppm; DMSO-*d*<sub>6</sub>, <sup>1</sup>H 2.50 ppm and <sup>13</sup>C{<sup>1</sup>H} 39.52 ppm and CD<sub>3</sub>CN, <sup>1</sup>H 1.94 ppm) and reported relative to tetramethylsilane. The coupling constants are expressed in hertz. All chemicals were purchased from the commercial sources and used as received without further purification. Primary alcohols were synthesized according to the literature procedures.<sup>1</sup> All of ruthenium (II) complexes used in catalytic studies were synthesised following reported procedures.<sup>1-2</sup>

**General procedure for amide N-alkylation reaction:** An oven dried Schlenk tube was charged with the stock solution (0.2 mol%) of catalyst (**2c**), prepared in CH<sub>3</sub>CN and after that the volatiles were removed in vacuum. To this, dppe (0.8 mol%), amide (0.5 mmol), primary alcohol (1.0 mmol), and KO<sup>t</sup>Bu (0.125 mmol) followed by *t*-amyl alcohol (1 mL) were added. The reaction tube was then kept in oil bath (bath temperature 130 °C) and heated for the specified time. After completion of the reaction, pure products were isolated *via* column chromatography using hexane/ethyl acetate as eluent.

**General procedure for the selective N-monoalkylation of 4-aminobenzamide:** An oven dried Schlenk tube was charged with the catalyst **2c** (1.0 mol%), dppe (2.0 mol%), 4-aminobenzamide (0.5 mmol), primary alcohol (0.75 mmol), and KO<sup>t</sup>Bu (0.5 mmol) followed by *t*-amyl alcohol (1 mL). The reaction tube was then kept in oil bath (bath temperature 130 °C) and heated for the specified time. After the completion of reaction, the pure products were isolated *via* column chromatography using dichloromethane/methanol as eluent.

**General procedure for the unsymmetrical N-dialkylation of 4-aminobenzamide:** An oven dried Schlenk tube was charged with the catalyst **2c** (0.5-1.0 mol%), dppe (1.0-2.0 mol%), mono alkylated 4-aminobenzamide derivative (0.25 mmol), primary alcohol (0.5 mmol), and KO<sup>t</sup>Bu (0.125 mmol) followed by *t*-amyl alcohol (1 mL). The reaction tube was then kept in oil bath (bath temperature 130 °C) and heated for the specified time. After the completion of

reaction, the pure products were isolated *via* column chromatography using dichloromethane/methanol as eluent.

### Procedure for the calculation of TON for N-benylation reaction:

An oven dried Schlenk tube was charged with a catalyst (**2c**) stock solution (0.002 mol%), prepared in CH<sub>3</sub>CN and after that the volatiles were removed in vacuum. To this, dppe (1 mg, 0.5 mol%), amide (0.5 mmol), primary alcohol (1.0 mmol), and KO<sup>t</sup>Bu (0.125 mmol) followed by *t*-amyl alcohol (1 mL) were added. The reaction tube was then kept in oil bath (bath temperature 130 °C) and heated for 24 h. After that the reaction mixture was cooled to room temperature and GC-MS analysis was performed using dodecane as an internal standard. The GC-MS data shows the formation of **5a** in 38% (0.01 mol%) yield which provides TON of 3800 at TOF = 158 h<sup>-1</sup>.

### Optimization studies

**Table S1.** Optimization data for benzamide alkylation using benzyl alcohol

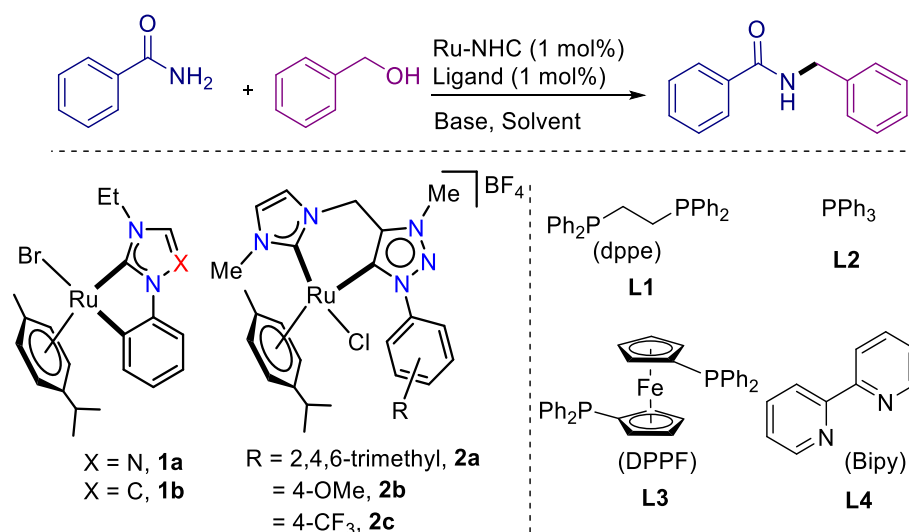

| Entry     | Base (eq.)                            | Catalyst              | Ligand    | Solvent                 | Conversion (%)                |
|-----------|---------------------------------------|-----------------------|-----------|-------------------------|-------------------------------|
| 1         | KO <sup>t</sup> Bu (1.0)              | <b>1a</b>             | <b>L1</b> | <sup>t</sup> AmOH       | 30%                           |
| 2         | KO <sup>t</sup> Bu (1.0)              | <b>1b</b>             | <b>L1</b> | <sup>t</sup> AmOH       | 57%                           |
| 3         | KO <sup>t</sup> Bu (1.0)              | <b>2a</b>             | <b>L1</b> | <sup>t</sup> AmOH       | 71%                           |
| 4         | KO <sup>t</sup> Bu (1.0)              | <b>2a</b>             | <b>L1</b> | THF                     | 10%                           |
| 5         | KO <sup>t</sup> Bu (1.0)              | <b>2a</b>             | <b>L1</b> | Toluene                 | 27%                           |
| 6         | KO <sup>t</sup> Bu (1.0)              | <b>2a</b>             | <b>L1</b> | Dioxane                 | 56%                           |
| 7         | KO <sup>t</sup> Bu (1.0)              | <b>2a</b>             | <b>L1</b> | DMF                     | NR                            |
| 8         | NaO <sup>t</sup> Bu (1.0)             | <b>2a</b>             | <b>L1</b> | <sup>t</sup> AmOH       | 43%                           |
| 9         | KOH (1.0)                             | <b>2a</b>             | <b>L1</b> | <sup>t</sup> AmOH       | 6%                            |
| 10        | Cs <sub>2</sub> CO <sub>3</sub> (1.0) | <b>2a</b>             | <b>L1</b> | <sup>t</sup> AmOH       | 9%                            |
| 11        | pyridine (1.0)                        | <b>2a</b>             | <b>L1</b> | <sup>t</sup> AmOH       | NR                            |
| 12        | KO <sup>t</sup> Bu (1.0)              | <b>2b</b>             | <b>L1</b> | <sup>t</sup> AmOH       | 60%                           |
| 13        | KO <sup>t</sup> Bu (1.0)              | <b>2c</b>             | <b>L1</b> | <sup>t</sup> AmOH       | 85%                           |
| 14        | KO <sup>t</sup> Bu (0.5)              | <b>2c</b>             | <b>L1</b> | <sup>t</sup> AmOH       | 100% (94%) <sup>b</sup>       |
| <b>15</b> | <b>KO<sup>t</sup>Bu (0.25)</b>        | <b>2c<sup>d</sup></b> | <b>L1</b> | <b><sup>t</sup>AmOH</b> | <b>100% (95%)<sup>c</sup></b> |
| 16        | KO <sup>t</sup> Bu (0.25)             | <b>2c<sup>d</sup></b> | <b>L2</b> | <sup>t</sup> AmOH       | 67% <sup>c</sup>              |
| 17        | KO <sup>t</sup> Bu (0.25)             | <b>2c<sup>d</sup></b> | <b>L3</b> | <sup>t</sup> AmOH       | 67% <sup>c</sup>              |
| 18        | KO <sup>t</sup> Bu (0.25)             | <b>2c<sup>d</sup></b> | <b>L4</b> | <sup>t</sup> AmOH       | NR <sup>c</sup>               |
| 19        | KO <sup>t</sup> Bu (0.25)             | <b>2c<sup>d</sup></b> | -         | <sup>t</sup> AmOH       | 36% <sup>c</sup>              |
| 20        | KO <sup>t</sup> Bu (0.25)             | -                     | -         | <sup>t</sup> AmOH       | NR <sup>c</sup>               |
| 21        | KO <sup>t</sup> Bu (0.25)             | -                     | <b>L4</b> | <sup>t</sup> AmOH       | NR <sup>c</sup>               |

<sup>a</sup>Reaction conditions: benzamide (0.5 mmol), benzyl alcohol (0.75 mmol), catalyst (0.005 mmol; 1 mol%), ligand (0.005 mmol; 1 mol%), 120 °C, 12 h, inert atmosphere. <sup>b</sup>2 equiv. alcohol, 130 °C, 18 h. <sup>c</sup>24 h. <sup>d</sup>**2c** (0.2 mol%), dppe (0.8 mol%). Isolated yields were given in parenthesis.

#### NMR characterization data of the isolated compounds

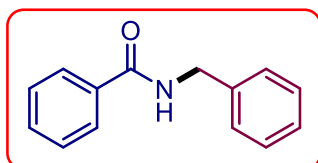

$^1\text{H}$  NMR (400 MHz,  $\text{CDCl}_3$ )  $\delta$  7.79 (d, 2H), 7.51-7.26 (m, 8H), 6.54 (s, 1H), 4.64 (d, 2H) ppm.  $^{13}\text{C}\{^1\text{H}\}$  NMR (101 MHz,  $\text{CDCl}_3$ )  $\delta$  167.6, 138.4, 134.6, 131.7, 128.9, 128.7, 128.1, 127.8, 127.1, 44.3 ppm. HRMS (ESI):  $m/z = 212.1080$ , calcd. for  $\text{C}_{14}\text{H}_{13}\text{NOH}$   $[\text{M} + \text{H}]^+$  : 212.1075.

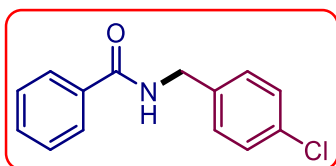

$^1\text{H}$  NMR (400 MHz,  $\text{CDCl}_3$ )  $\delta$  7.78 (d, 2H), 7.50 (t, 1H), 7.41 (t, 2H), 7.31-7.25 (m, 5H), 6.65 (s, 1H), 4.58 (d, 2H) ppm.  $^{13}\text{C}\{^1\text{H}\}$  NMR (101 MHz,  $\text{CDCl}_3$ )  $\delta$  167.6, 136.9, 134.3, 133.5, 131.8, 129.3, 129.0, 128.8, 127.1, 43.5 ppm. HRMS (ESI):  $m/z = 245.0689$ , calcd. for  $\text{C}_{14}\text{H}_{12}\text{ClNOH}$   $[\text{M} + \text{H}]^+$  : 246.0686.

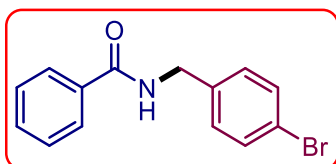

$^1\text{H}$  NMR (500 MHz,  $\text{CDCl}_3$ )  $\delta$  7.78 (d, 2H), 7.52-7.41 (m, 5H), 7.22 (d, 2H), 6.52 (s, 1H), 4.58 (d, 2H) ppm.  $^{13}\text{C}\{^1\text{H}\}$  NMR (101 MHz,  $\text{CDCl}_3$ )  $\delta$  167.6, 137.5, 134.3, 132.0, 131.8, 129.7, 128.8, 127.1, 121.6, 43.6 ppm. HRMS (ESI):  $m/z = 290.0179$ , calcd. for  $\text{C}_{14}\text{H}_{12}\text{BrNOH}$   $[\text{M} + \text{H}]^+$  : 290.0181.

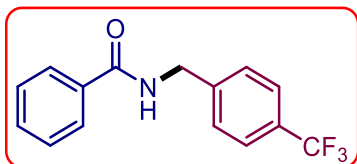

$^1\text{H}$  NMR (400 MHz,  $\text{CDCl}_3$ )  $\delta$  7.79 (d, 2H), 7.56 (d, 2H), 7.50 (t, 1H), 7.42-7.38 (m, 4H), 6.91 (s, 1H), 4.64 (d, 2H) ppm.  $^{13}\text{C}\{^1\text{H}\}$  NMR (101 MHz,  $\text{CDCl}_3$ )  $\delta$  167.8, 142.6, 134.1, 131.9, 129.8 (d,  $J(\text{C}, \text{F}) = 32.5$  Hz) 128.8, 128.0, 127.1, 125.7 (q,  $J(\text{C}, \text{F}) = 3.6$  Hz), 125.5 (t,  $J(\text{C}, \text{F}) = 271.0$  Hz), 122.8, 43.6 ppm. HRMS (ESI):  $m/z = 280.0947$ , calcd. for  $\text{C}_{15}\text{H}_{12}\text{F}_3\text{NOH}$   $[\text{M} + \text{H}]^+$  : 280.0949.

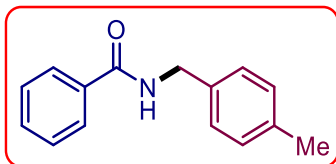

$^1\text{H}$  NMR (500 MHz,  $\text{CDCl}_3$ )  $\delta$  7.79-7.77 (m, 2H), 7.50-7.46 (m, 1H), 7.41-7.38 (m, 2H), 7.23 (d, 2H), 7.15 (d, 2H), 6.60 (s, 1H), 4.58 (d, 2H), 2.34 (s, 3H) ppm.  $^{13}\text{C}\{^1\text{H}\}$  NMR (126 MHz,  $\text{CDCl}_3$ )  $\delta$  167.5, 137.4, 135.4, 134.6, 131.5, 129.5, 128.6, 128.0, 127.1, 44.0, 21.2 ppm. HRMS (ESI):  $m/z = 226.1239$ , calcd. for  $\text{C}_{15}\text{H}_{15}\text{NOH}$   $[\text{M} + \text{H}]^+$  : 226.1232.

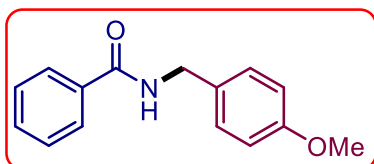

$^1\text{H}$  NMR (500 MHz,  $\text{CDCl}_3$ )  $\delta$  7.70 (d, 2H), 7.42-7.32 (m, 3H), 7.20-7.18 (m, 2H), 6.80 (d, 2H), 6.38 (s, 1H), 4.48 (d, 2H), 3.72 (s, 3H) ppm.  $^{13}\text{C}\{^1\text{H}\}$  NMR (101 MHz,  $\text{CDCl}_3$ )  $\delta$  167.4, 159.3, 134.6, 131.6, 130.4, 129.4, 128.7, 127.1, 114.3, 55.4, 43.8 ppm. HRMS (ESI):  $m/z = 242.1182$ , calcd. for  $\text{C}_{15}\text{H}_{15}\text{NO}_2\text{H} [\text{M} + \text{H}]^+$  : 242.1181.

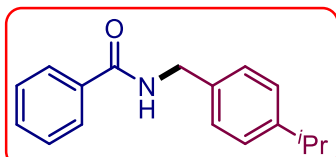

$^1\text{H}$  NMR (400 MHz,  $\text{CDCl}_3$ )  $\delta$  7.77 (d, 2H), 7.47 (t, 1H), 7.38 (t, 2H), 7.27-7.18 (m, 4H), 6.62 (s, 1H), 4.58 (d, 2H), 2.94-2.84 (m, 1H), 1.24 (d, 6H) ppm.  $^{13}\text{C}\{^1\text{H}\}$  NMR (101 MHz,  $\text{CDCl}_3$ )  $\delta$  167.5, 148.4, 135.6, 134.5, 131.6, 128.6, 128.1, 127.1, 126.9, 126.8, 44.0, 33.9, 24.1 ppm. HRMS (ESI):  $m/z = 254.1544$ , calcd. for  $\text{C}_{17}\text{H}_{19}\text{NOH} [\text{M} + \text{H}]^+$  : 254.1545.

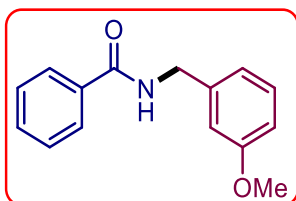

$^1\text{H}$  NMR (400 MHz,  $\text{CDCl}_3$ )  $\delta$  7.78 (d, 2H), 7.48 (t, 1H), 7.38 (t, 2H), 7.24 (t, 1H), 6.92-6.80 (m, 3H), 6.76 (s, 1H), 4.57 (d, 2H), 3.77 (s, 3H) ppm.  $^{13}\text{C}\{^1\text{H}\}$  NMR (101 MHz,  $\text{CDCl}_3$ )  $\delta$  167.6, 160.0, 139.9, 134.4, 131.6, 129.8, 128.6, 127.1, 120.1, 113.5, 113.0, 55.3, 44.1 ppm. HRMS (ESI):  $m/z = 242.1181$ , calcd. for  $\text{C}_{15}\text{H}_{15}\text{NO}_2\text{H} [\text{M} + \text{H}]^+$  : 242.1181.

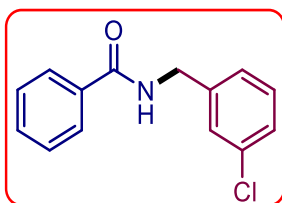

$^1\text{H}$  NMR (400 MHz,  $\text{CDCl}_3$ )  $\delta$  7.71 (d, 2H), 7.42 (t, 1H), 7.33 (t, 2H), 7.22 (s, 1H), 7.18-7.12 (m, 3H), 6.72 (s, 1H), 4.50 (d, 2H) ppm.  $^{13}\text{C}\{^1\text{H}\}$  NMR (101 MHz,  $\text{CDCl}_3$ )  $\delta$  167.7, 140.5, 134.6, 134.2, 131.8, 130.1, 128.7, 127.9, 127.8, 127.1, 126.0, 43.5 ppm. HRMS (ESI):  $m/z = 246.0677$ , calcd. for  $\text{C}_{14}\text{H}_{12}\text{NClOH} [\text{M} + \text{H}]^+$  : 246.0686.

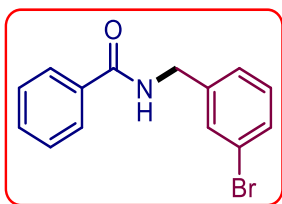

$^1\text{H}$  NMR (400 MHz,  $\text{CDCl}_3$ )  $\delta$  7.72 (d, 2H), 7.45-7.32 (m, 5H), 7.19-7.09 (m, 2H), 6.69 (s, 1H), 4.50 (d, 2H) ppm.  $^{13}\text{C}\{^1\text{H}\}$  NMR (101 MHz,  $\text{CDCl}_3$ )  $\delta$  167.6, 140.8, 134.2, 131.8, 130.8, 130.7, 130.4, 128.7, 127.1, 126.5, 122.9, 43.5 ppm. HRMS (ESI):  $m/z = 290.0172$ , calcd. for  $\text{C}_{14}\text{H}_{12}\text{NBrOH}$   $[\text{M} + \text{H}]^+$  : 290.0181.

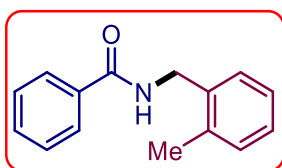

$^1\text{H}$  NMR (400 MHz,  $\text{CDCl}_3$ )  $\delta$  7.78 (d, 2H), 7.49 (t, 1H), 7.41 (t, 2H), 7.29 (d, 1H), 7.25-7.17 (m, 3H), 6.38 (s, 1H), 4.63 (d, 2H), 2.36 (s, 3H) ppm.  $^{13}\text{C}\{^1\text{H}\}$  NMR (101 MHz,  $\text{CDCl}_3$ )  $\delta$  167.4, 136.7, 135.9, 134.5, 131.6, 130.7, 128.8, 128.7, 128.0, 127.1, 126.4, 42.4, 19.2 ppm. HRMS (ESI):  $m/z = 226.1237$ , calcd. for  $\text{C}_{15}\text{H}_{15}\text{NOH}$   $[\text{M} + \text{H}]^+$  : 226.1232.

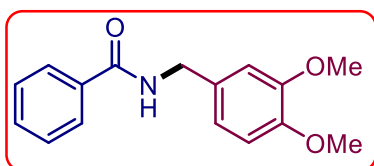

$^1\text{H}$  NMR (400 MHz,  $\text{CDCl}_3$ )  $\delta$  7.79 (d, 2H), 7.50 (t, 1H), 7.43 (t, 2H), 6.91-6.88 (m, 2H), 6.84 (d, 1H), 6.38 (s, 1H), 4.59 (d, 2H), 3.87 (s, 6H) ppm.  $^{13}\text{C}\{^1\text{H}\}$  NMR (101 MHz,  $\text{CDCl}_3$ )  $\delta$  167.4, 149.5, 148.9, 134.7, 131.7, 131.0, 128.8, 127.1, 120.5, 111.7, 111.6, 56.2, 56.1, 44.2 ppm. HRMS (ESI):  $m/z = 272.1297$ , calcd. for  $\text{C}_{16}\text{H}_{17}\text{NO}_3\text{H}$   $[\text{M} + \text{H}]^+$  : 272.1287.

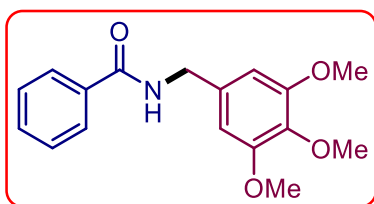

$^1\text{H}$  NMR (400 MHz,  $\text{CDCl}_3$ )  $\delta$  7.82 (d, 2H), 7.52-7.41 (m, 3H), 6.67 (s, 1H), 6.56 (s, 2H), 4.56 (d, 2H), 3.83 (s, 9H) ppm.  $^{13}\text{C}\{^1\text{H}\}$  NMR (101 MHz,  $\text{CDCl}_3$ )  $\delta$  167.4, 153.4, 137.3, 134.3, 134.0, 131.6, 128.6, 127.0, 105.0, 60.8, 56.1, 44.5 ppm. HRMS (ESI):  $m/z = 302.1387$ , calcd. for  $\text{C}_{17}\text{H}_{19}\text{NO}_4\text{H}$   $[\text{M} + \text{H}]^+$  : 302.1392.

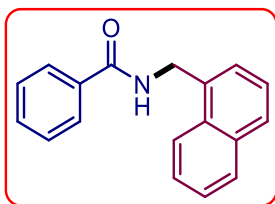

$^1\text{H}$  NMR (500 MHz,  $\text{CDCl}_3$ )  $\delta$  8.08 (d, 1H), 7.89 (dd, 1H), 7.84 (d, H), 7.76-7.74 (m, 2H), 7.58-7.36 (m, 7H), 6.46 (s, 1H), 5.08 (d, 2H) ppm.  $^{13}\text{C}\{^1\text{H}\}$  NMR (126 MHz,  $\text{CDCl}_3$ )  $\delta$  167.3, 134.5, 134.1, 133.5, 131.6, 128.9, 128.9, 128.7, 127.1, 127.0, 126.9, 126.2, 125.6, 123.6, 42.5 ppm. HRMS (ESI):  $m/z = 262.1230$ , calcd. for  $\text{C}_{18}\text{H}_{15}\text{NOH}$   $[\text{M} + \text{H}]^+$  : 262.1232.

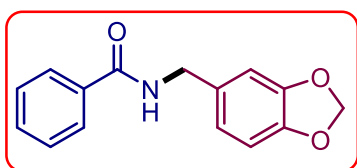

$^1\text{H}$  NMR (500 MHz,  $\text{CDCl}_3$ )  $\delta$  7.78-7.76 (m, 2H), 7.51-7.47 (m, 1H), 7.43-7.40 (m, 2H), 6.84-6.76 (m, 3H), 6.45 (s, 1H), 5.94 (s, 2H), 4.53 (d, 2H) ppm.  $^{13}\text{C}\{^1\text{H}\}$  NMR (101 MHz,  $\text{CDCl}_3$ )  $\delta$  167.5, 148.2, 147.3, 134.5, 132.2, 131.7, 128.8, 127.1, 121.4, 108.7, 108.5, 101.3, 44.2 ppm. HRMS (ESI):  $m/z = 256.0976$ , calcd. for  $\text{C}_{15}\text{H}_{13}\text{NO}_3\text{H}$   $[\text{M} + \text{H}]^+$  : 256.0974.

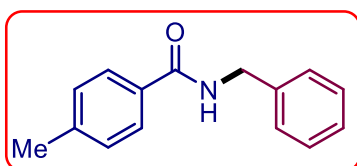

$^1\text{H}$  NMR (500 MHz,  $\text{CDCl}_3$ )  $\delta$  7.69 (d, 2H), 7.35 (d, 4H), 7.31-7.27 (m, 1H), 7.22 (d, 2H), 6.44 (s, 1H), 4.63 (d, 2H), 2.39 (s, 3H) ppm.  $^{13}\text{C}\{^1\text{H}\}$  NMR (126 MHz,  $\text{CDCl}_3$ )  $\delta$  167.4, 142.1, 138.5, 131.7, 129.4, 128.9, 128.0, 127.7, 127.1, 44.2, 21.5 ppm. HRMS (ESI):  $m/z = 226.1237$ , calcd. for  $\text{C}_{15}\text{H}_{15}\text{NOH}$   $[\text{M} + \text{H}]^+$  : 226.1232.

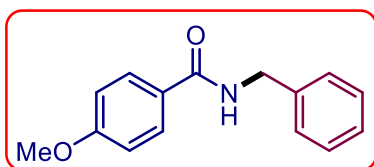

$^1\text{H}$  NMR (400 MHz,  $\text{CDCl}_3$ )  $\delta$  7.78 (d, 2H), 7.35-7.29 (m, 5H), 6.92-6.87 (m, 2H), 6.55 (s, 1H), 4.62 (d, 2H), 3.85 (s, 3H) ppm.  $^{13}\text{C}\{^1\text{H}\}$  NMR (101 MHz,  $\text{CDCl}_3$ )  $\delta$  167.0, 162.3, 138.6, 129.0, 128.9, 128.8, 128.0, 127.6, 126.8, 113.9, 55.5, 44.1 ppm. HRMS (ESI):  $m/z = 242.1182$ , calcd. for  $\text{C}_{15}\text{H}_{15}\text{NO}_2\text{H}$   $[\text{M} + \text{H}]^+$  : 242.1181.

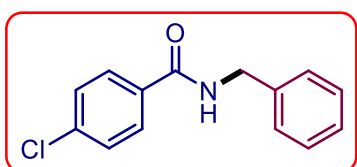



$^1\text{H}$  NMR (400 MHz,  $\text{CDCl}_3$ )  $\delta$  7.71 (d, 2H), 7.38-7.29 (m, 7H), 6.60 (s, 1H), 4.60 (d, 2H) ppm.  $^{13}\text{C}\{^1\text{H}\}$  NMR (101 MHz,  $\text{CDCl}_3$ )  $\delta$  166.5, 138.1, 137.9, 132.8, 128.9, 128.6, 128.0, 127.8, 44.3 ppm. HRMS (ESI):  $m/z = 245.0689$ , calcd. for  $\text{C}_{14}\text{H}_{12}\text{NClO}_2\text{H}$   $[\text{M} + \text{H}]^+$  : 246.0686.

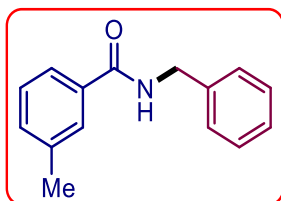

$^1\text{H}$  NMR (400 MHz,  $\text{CDCl}_3$ )  $\delta$  7.62 (s, 1H), 7.58-7.55 (m, 1H), 7.36-7.28 (m, 7H), 6.45 (s, 1H), 4.64 (d, 2H), 2.39 (s, 1H) ppm.  $^{13}\text{C}\{^1\text{H}\}$  NMR (101 MHz,  $\text{CDCl}_3$ )  $\delta$  167.7, 138.6, 138.4, 134.5, 132.4, 128.9, 128.6, 128.1, 127.9, 127.7, 124.0, 44.3, 21.5 ppm. HRMS (ESI):  $m/z = 226.1239$ , calcd. for  $\text{C}_{15}\text{H}_{15}\text{NO}_2\text{H}$   $[\text{M} + \text{H}]^+$  : 226.1232.

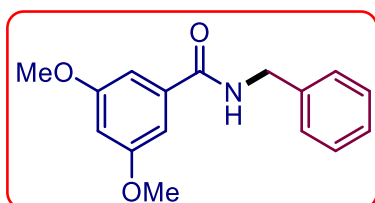

$^1\text{H}$  NMR (400 MHz,  $\text{CDCl}_3$ )  $\delta$  7.37-7.28 (m, 5H), 6.91 (d, 2H), 6.57 (s, 1H), 6.47 (s, 1H), 4.62 (d, 2H), 3.80 (s, 6H) ppm.  $^{13}\text{C}\{^1\text{H}\}$  NMR (101 MHz,  $\text{CDCl}_3$ )  $\delta$  167.3, 161.0, 138.2, 136.7, 128.9, 128.0, 127.8, 105.1, 103.7, 55.7, 44.3 ppm. HRMS (ESI):  $m/z = 272.1292$ , calcd. for  $\text{C}_{16}\text{H}_{17}\text{NO}_3\text{H}$   $[\text{M} + \text{H}]^+$  : 272.1287.

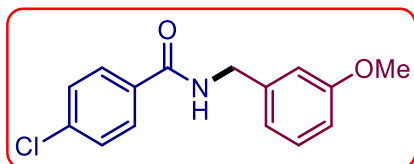

$^1\text{H}$  NMR (400 MHz,  $\text{CDCl}_3$ )  $\delta$  7.72 (d, 2H), 7.38 (d, 2H), 7.28-7.24 (m, 2H), 6.92-6.82 (m, 3H), 6.53 (s, 1H), 4.58 (d, 2H), 3.79 (s, 3H) ppm.  $^{13}\text{C}\{^1\text{H}\}$  NMR (101 MHz,  $\text{CDCl}_3$ )  $\delta$  166.5, 160.1, 139.6, 137.9, 132.8, 130.0, 129.0, 128.6, 120.2, 113.7, 113.2, 55.4, 44.3 ppm. HRMS (ESI):  $m/z = 276.0782$ , calcd. for  $\text{C}_{15}\text{H}_{14}\text{NClO}_2\text{H}$   $[\text{M} + \text{H}]^+$  : 276.0791.

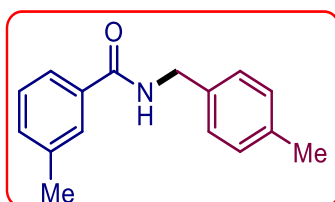

$^1\text{H}$  NMR (400 MHz,  $\text{CDCl}_3$ )  $\delta$  7.52 (s, 1H), 7.47-7.44 (m, 1H), 7.22-7.14 (m, 4H), 7.06 (d, 2H), 6.43 (s, 1H), 4.49 (d, 2H), 2.27 (d, 6H) ppm.  $^{13}\text{C}\{^1\text{H}\}$  NMR (101 MHz,  $\text{CDCl}_3$ )  $\delta$  167.6,

138.5, 137.4, 135.3, 134.5, 132.3, 129.5, 128.5, 128.0, 127.8, 124.0, 44.0, 21.4, 21.2 ppm.  
HRMS (ESI):  $m/z = 240.1392$ , calcd. for  $C_{16}H_{17}NOH$   $[M + H]^+$  : 240.1388.

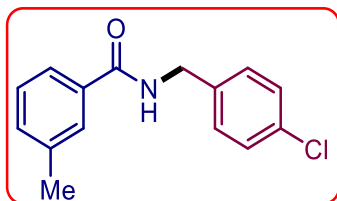

$^1H$  NMR (400 MHz,  $CDCl_3$ )  $\delta$  7.62 (s, 1H), 7.58-7.56 (m, 1H), 7.32-7.28 (m, 6H), 6.64 (s, 1H), 4.59 (d, 2H), 2.39 (s, 3H) ppm.  $^{13}C\{^1H\}$  NMR (101 MHz,  $CDCl_3$ )  $\delta$  167.8, 138.6, 137.0, 134.3, 133.4, 132.5, 129.3, 129.0, 128.6, 127.9, 124.0, 43.4, 21.4 ppm. HRMS (ESI):  $m/z = 260.0849$ , calcd. for  $C_{15}H_{14}NClOH$   $[M + H]^+$  : 260.0842.

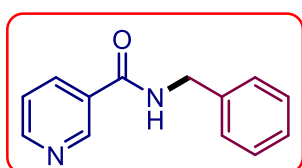

$^1H$  NMR (400 MHz,  $CDCl_3$ )  $\delta$  8.91 (s, 1H), 8.61 (t, 1H), 8.10 (d, 1H), 7.31-7.27 (m, 6H), 7.09 (s, 1H), 4.61 (d, 2H) ppm.  $^{13}C\{^1H\}$  NMR (101 MHz,  $CDCl_3$ )  $\delta$  165.7, 152.2, 148.0, 137.9, 135.4, 130.2, 128.9, 128.0, 127.8, 123.6, 44.2 ppm. HRMS (ESI):  $m/z = 213.1027$ , calcd. for  $C_{13}H_{12}N_2OH$   $[M + H]^+$  : 213.1028.

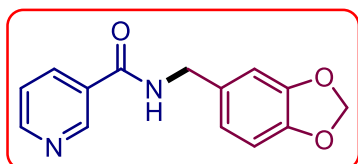

$^1H$  NMR (400 MHz,  $CDCl_3$ )  $\delta$  8.97 (s, 1H), 8.65 (d, 1H), 8.13 (d, 1H), 7.36 (dd, 1H), 6.92 (s, 1H), 6.82-6.73 (m, 3H), 5.92 (s, 2H), 4.52 (d, 2H) ppm.  $^{13}C\{^1H\}$  NMR (101 MHz,  $CDCl_3$ )  $\delta$  165.5, 152.1, 148.1, 147.8, 147.3, 135.6, 131.7, 130.3, 123.7, 121.4, 108.6, 108.5, 101.3, 44.1 ppm. HRMS (ESI):  $m/z = 257.0913$ , calcd. for  $C_{14}H_{12}N_2O_3H$   $[M + H]^+$  : 257.0926.

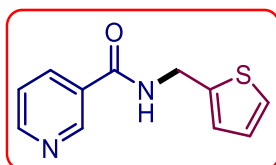

$^1H$  NMR (400 MHz,  $CDCl_3$ )  $\delta$  8.92 (s, 1H), 8.64 (d, 1H), 8.11 (d, 1H), 7.34 (dd, 1H), 7.22 (d, 1H), 7.11 (s, 1H), 7.01 (d, 1H), 6.95-6.93 (m, 1H), 4.79 (d, 2H) ppm.  $^{13}C\{^1H\}$  NMR (101 MHz,  $CDCl_3$ )  $\delta$  165.5, 152.3, 148.0, 140.4, 135.4, 130.0, 127.1, 126.6, 125.6, 123.6, 38.9 ppm. HRMS (ESI):  $m/z = 219.0581$ , calcd. for  $C_{11}H_{10}N_2SOH$   $[M + H]^+$  : 219.0592.

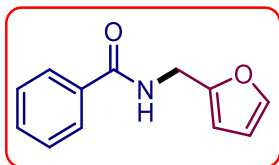

$^1\text{H}$  NMR (400 MHz,  $\text{CDCl}_3$ )  $\delta$  7.78 (d, 2H), 7.52-7.38 (m, 4H), 6.48 (s, 1H), 6.32 (d, 2H), 4.64 (d, 2H) ppm.  $^{13}\text{C}\{^1\text{H}\}$  NMR (101 MHz,  $\text{CDCl}_3$ )  $\delta$  167.4, 151.3, 142.5, 134.3, 131.8, 128.7, 127.1, 110.7, 107.9, 37.2 ppm. HRMS (ESI):  $m/z$  = 202.0865, calcd. for  $\text{C}_{12}\text{H}_{11}\text{NO}_2\text{H}$  [ $\text{M} + \text{H}$ ] $^+$  : 202.0868.

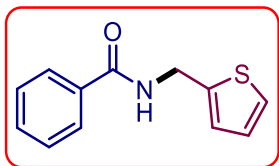

$^1\text{H}$  NMR (500 MHz,  $\text{CDCl}_3$ )  $\delta$  7.79-7.76 (m, 2H), 7.49-7.46 (m, 1H), 7.41-7.38 (m, 2H), 7.22 (dd, 1H), 7.02-7.00 (m, 1H), 6.95 (dd, 1H), 6.75 (s, 1H), 4.79 (d, 2H) ppm.  $^{13}\text{C}\{^1\text{H}\}$  NMR (126 MHz,  $\text{CDCl}_3$ )  $\delta$  167.4, 141.0, 134.2, 131.7, 128.7, 127.1, 127.0, 126.3, 125.4, 38.9 ppm. HRMS (ESI):  $m/z$  = 218.0640, calcd. for  $\text{C}_{12}\text{H}_{11}\text{NSOH}$  [ $\text{M} + \text{H}$ ] $^+$  : 218.0640.

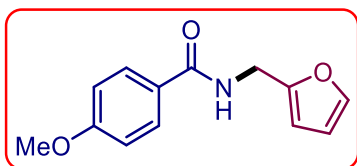

$^1\text{H}$  NMR (400 MHz,  $\text{CDCl}_3$ )  $\delta$  7.75 (d, 2H), 7.34 (s, 1H), 6.87 (d, 2H), 6.63 (s, 1H), 6.31 (s, 1H), 6.25 (d, 1H), 4.59 (d, 2H), 3.81 (s, 3H) ppm.  $^{13}\text{C}\{^1\text{H}\}$  NMR (101 MHz,  $\text{CDCl}_3$ )  $\delta$  166.9, 162.3, 151.6, 142.3, 129.0, 126.5, 113.8, 110.6, 107.6, 55.5, 37.0 ppm. HRMS (ESI):  $m/z$  = 232.09658, calcd. for  $\text{C}_{13}\text{H}_{13}\text{NO}_3\text{H}$  [ $\text{M} + \text{H}$ ] $^+$  : 232.0974.

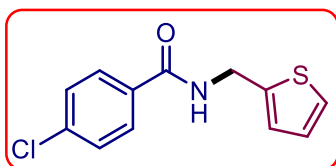

$^1\text{H}$  NMR (400 MHz,  $\text{CDCl}_3$ )  $\delta$  7.65 (d, 2H), 7.33 (d, 2H), 7.19 (s, 1H), 6.97 (d, 1H), 6.90 (t, 1H), 6.37 (s, 1H), 4.73 (d, 2H) ppm.  $^{13}\text{C}\{^1\text{H}\}$  NMR (101 MHz,  $\text{CDCl}_3$ )  $\delta$  166.2, 140.6, 138.1, 132.6, 129.0, 128.6, 127.2, 126.6, 125.7, 39.0 ppm. HRMS (ESI):  $m/z$  = 252.0235, calcd. for  $\text{C}_{12}\text{H}_{10}\text{NClSOH}$  [ $\text{M} + \text{H}$ ] $^+$  : 252.0250.

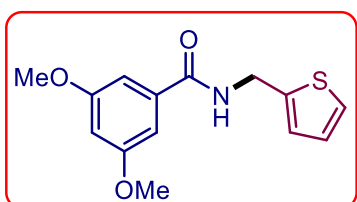

$^1\text{H}$  NMR (400 MHz,  $\text{CDCl}_3$ )  $\delta$  7.23 (d, 1H), 7.02 (s, 1H), 6.97-6.94 (m, 1H), 6.90 (d, 2H), 6.56-6.54 (m, 1H), 4.78 (d, 2H), 3.79 (d, 6H) ppm.  $^{13}\text{C}\{^1\text{H}\}$  NMR (101 MHz,  $\text{CDCl}_3$ )  $\delta$  167.1, 161.0, 140.8, 136.5, 127.1, 126.3, 125.4, 105.1, 103.8, 55.7, 39.0 ppm. HRMS (ESI):  $m/z = 278.0839$ , calcd. for  $\text{C}_{14}\text{H}_{15}\text{NSO}_3\text{H}$   $[\text{M} + \text{H}]^+$  : 278.0851.

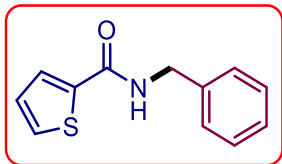

$^1\text{H}$  NMR (400 MHz,  $\text{CDCl}_3$ )  $\delta$  7.45-7.39 (m, 2H), 7.29-7.18 (m, 5H), 6.99-6.97 (m, 1H), 6.32 (s, 1H), 4.54 (d, 2H) ppm.  $^{13}\text{C}\{^1\text{H}\}$  NMR (101 MHz,  $\text{CDCl}_3$ )  $\delta$  161.9, 138.9, 138.2, 130.2, 128.9, 128.3, 128.1, 127.8, 44.1 ppm. HRMS (ESI):  $m/z = 218.0630$ , calcd. for  $\text{C}_{12}\text{H}_{11}\text{NSOH}$   $[\text{M} + \text{H}]^+$  : 218.0640.

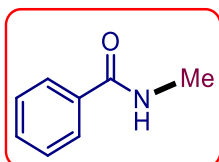

$^1\text{H}$  NMR (400 MHz,  $\text{CDCl}_3$ )  $\delta$  7.77-7.75 (m, 2H), 7.51-7.47 (m, 1H), 7.44-7.41 (m, 2H), 3.03 (d, 3H) ppm. GCMS:  $m/z = 135$ , calcd. for  $\text{C}_8\text{H}_9\text{NO}$   $[\text{M}]^+$  : 135.17.

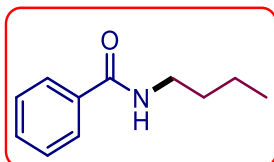

$^1\text{H}$  NMR (400 MHz,  $\text{CDCl}_3$ )  $\delta$  7.75 (d, 2H), 7.41 (dt, 3H), 6.54 (s, 1H), 3.40 (q, 2H), 1.56 (p, 2H), 1.37 (m, 2H), 0.91 (t, 3H) ppm.  $^{13}\text{C}\{^1\text{H}\}$  NMR (101 MHz,  $\text{CDCl}_3$ )  $\delta$  167.7, 134.9, 131.3, 128.5, 127.0, 39.9, 31.8, 20.2, 13.8 ppm. HRMS (ESI):  $m/z = 178.1230$ , calcd. for  $\text{C}_{11}\text{H}_{15}\text{NOH}$   $[\text{M} + \text{H}]^+$  : 178.1232

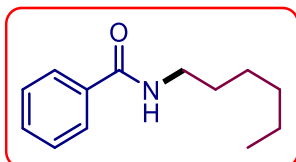

$^1\text{H}$  NMR (400 MHz,  $\text{CDCl}_3$ )  $\delta$  7.75 (d, 2H), 7.46-7.35 (m, 3H), 6.54 (s, 1H), 3.39 (q, 2H), 1.61-1.54 (s, 2H), 1.35-1.24 (m, 6H), 0.86 (t, 1H) ppm.  $^{13}\text{C}\{^1\text{H}\}$  NMR (101 MHz,  $\text{CDCl}_3$ )  $\delta$  167.7, 134.9, 131.3, 128.5, 127.0, 40.2, 31.6, 29.7, 26.7, 22.6, 14.1 ppm. HRMS (ESI):  $m/z = 206.1534$ , calcd. for  $\text{C}_{13}\text{H}_{19}\text{NOH}$   $[\text{M} + \text{H}]^+$  : 206.1545.

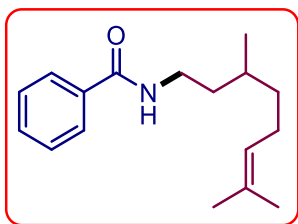

$^1\text{H}$  NMR (400 MHz,  $\text{CDCl}_3$ )  $\delta$  7.75 (d, 2H), 7.49-7.38 (m, 3H), 6.22 (s, 1H), 5.10 (t, 1H), 3.53-3.39 (m, 2H), 2.06-1.90 (m, 2H), 1.66 (s, 3H), 1.64-1.49 (m, 5H), 1.46-1.32 (m, 2H), 1.25-1.15 (m, 1H), 0.94 (d, 3H) ppm.  $^{13}\text{C}\{^1\text{H}\}$  NMR (101 MHz,  $\text{CDCl}_3$ )  $\delta$  167.6, 135.0, 131.5, 131.4, 128.6, 126.9, 124.7, 38.3, 37.1, 36.7, 30.4, 25.8, 25.5, 19.5, 17.8 ppm. HRMS (ESI):  $m/z$  = 260.2014, calcd. for  $\text{C}_{17}\text{H}_{25}\text{NOH}$   $[\text{M} + \text{H}]^+$  : 260.2014.

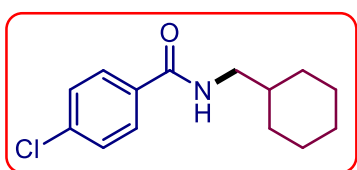

$^1\text{H}$  NMR (400 MHz,  $\text{CDCl}_3$ )  $\delta$  7.70 (d, 2H), 7.39 (d, 2H), 6.21 (s, 1H), 3.28 (t, 2H), 1.78-1.67 (m, 6H), 1.30-1.15 (m, 3H), 1.03-0.93 (m, 2H) ppm.  $^{13}\text{C}\{^1\text{H}\}$  NMR (101 MHz,  $\text{CDCl}_3$ )  $\delta$  166.7, 137.7, 133.4, 128.9, 128.4, 46.5, 38.1, 31.1, 26.5, 25.9 ppm. HRMS (ESI):  $m/z$  = 252.1162, calcd. for  $\text{C}_{14}\text{H}_{18}\text{NClOH}$   $[\text{M} + \text{H}]^+$  : 252.1155.

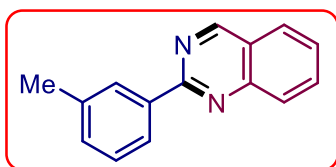

$^1\text{H}$  NMR (400 MHz,  $\text{CDCl}_3$ )  $\delta$  9.47 (s, 1H), 8.42 (d, 2H), 8.10 (d, 1H), 7.91 (t, 2H), 7.61 (t, 1H), 7.44 (t, 1H), 7.33 (d, 1H), 2.49 (s, 3H).  $^{13}\text{C}\{^1\text{H}\}$  NMR (101 MHz,  $\text{CDCl}_3$ )  $\delta$  161.3, 160.6, 150.9, 138.4, 138.0, 134.3, 131.6, 129.3, 128.7, 127.4, 127.3, 125.9, 123.7, 21.7 ppm. HRMS (ESI):  $m/z$  = 221.1085, calcd. for  $\text{C}_{15}\text{H}_{12}\text{N}_2\text{H}$   $[\text{M} + \text{H}]^+$  : 221.1079.

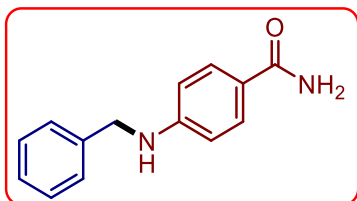

$^1\text{H}$  NMR (400 MHz,  $\text{DMSO-}d_6$ )  $\delta$  7.60 (d, 2H), 7.52 (s, 1H), 7.36-7.30 (m, 4H), 7.25-7.20 (m, 1H), 6.84 (s, 1H), 6.77 (t, 1H), 6.55 (d, 2H), 4.32 (d, 2H) ppm.  $^{13}\text{C}\{^1\text{H}\}$  NMR (101 MHz,  $\text{DMSO-}d_6$ )  $\delta$  168.4, 151.6, 140.2, 129.4, 128.8, 127.6, 127.2, 121.6, 111.5, 46.5 ppm. HRMS (ESI):  $m/z$  = 227.1181, calcd. for  $\text{C}_{14}\text{H}_{14}\text{N}_2\text{OH}$   $[\text{M} + \text{H}]^+$  : 227.1184.

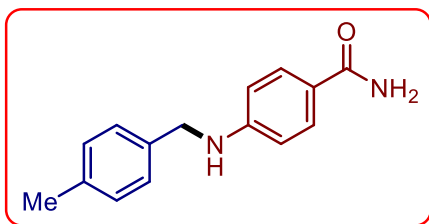

$^1\text{H}$  NMR (500 MHz, DMSO-*d*<sub>6</sub>)  $\delta$  7.63-7.61 (m, 2H), 7.50 (s, 1H), 7.24-7.22 (m, 2H), 7.13-7.11 (m, 2H), 6.81(s, 1H), 6.69 (t, 1H), 6.57-6.54 (m, 2H), 4.27 (d, 2H), 2.27 (s, 3H) ppm.  $^{13}\text{C}\{^1\text{H}\}$  NMR (126 MHz, DMSO-*d*<sub>6</sub>)  $\delta$  168.5, 151.6, 137.1, 136.2, 129.4, 129.3, 127.6, 121.7, 111.5, 46.3, 21.1 ppm. HRMS (ESI):  $m/z$  = 241.1337, calcd. for C<sub>15</sub>H<sub>16</sub>N<sub>2</sub>OH [M + H]<sup>+</sup> : 241.1341.

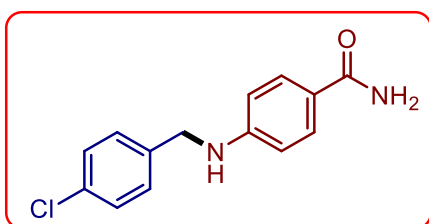

$^1\text{H}$  NMR (400 MHz, DMSO-*d*<sub>6</sub>)  $\delta$  7.61 (d, 2H), 7.52 (s, 1H), 7.42-7.35 (m, 4H), 6.86 (s, 1H), 6.82 (t, 1H), 6.54 (d, 2H), 4.32 (d, 2H) ppm.  $^{13}\text{C}\{^1\text{H}\}$  NMR (101 MHz, DMSO-*d*<sub>6</sub>)  $\delta$  168.4, 151.3, 139.4, 131.7, 129.5, 129.4, 128.7, 121.8, 111.5, 45.7 ppm. HRMS (ESI):  $m/z$  = 261.0790, calcd. for C<sub>14</sub>H<sub>13</sub>N<sub>2</sub>ClOH [M + H]<sup>+</sup> : 261.0795.

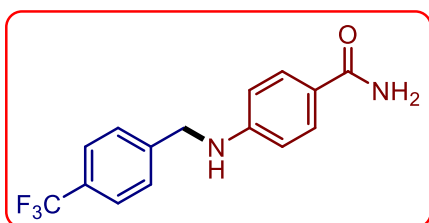

$^1\text{H}$  NMR (400 MHz, DMSO-*d*<sub>6</sub>)  $\delta$  7.67 (d, 2H), 7.60 (d, 2H), 7.55-7.50 (m, 3H), 6.90-6.84 (m, 2H), 6.54 (d, 2H), 4.42 (d, 2H) ppm.  $^{13}\text{C}\{^1\text{H}\}$  NMR (101 MHz, DMSO-*d*<sub>6</sub>)  $\delta$  168.4, 151.3, 145.4, 129.5, 128.2, 128.1 (t,  $J$  (C, F) = 31.5 Hz), 125.7 (q,  $J$  (C, F) = 3.78 Hz), 123.5 (t,  $J$  (C, F) = 271.47 Hz), 122.0, 111.5, 46.0 ppm. HRMS (ESI):  $m/z$  = 295.1059, calcd. for C<sub>15</sub>H<sub>13</sub>F<sub>3</sub>N<sub>2</sub>OH [M + H]<sup>+</sup> : 295.1058.

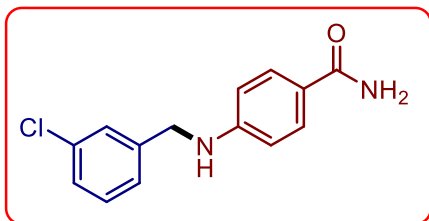

$^1\text{H}$  NMR (500 MHz, DMSO-*d*<sub>6</sub>)  $\delta$  7.63 (d, 2H), 7.53 (s, 1H), 7.39-7.29 (m, 4H), 6.86-6.81 (m, 2H), 6.57 (d, 2H), 4.35 (d, 2H) ppm.  $^{13}\text{C}\{^1\text{H}\}$  NMR (126 MHz, DMSO-*d*<sub>6</sub>)  $\delta$  168.5, 151.3,

143.1, 133.6, 130.7, 129.5, 127.3, 127.1, 126.3, 122.0, 111.6, 45.9 ppm. HRMS (ESI):  $m/z$  = 261.0801, calcd. for  $C_{14}H_{13}N_2ClOH$   $[M + H]^+$  : 261.0795

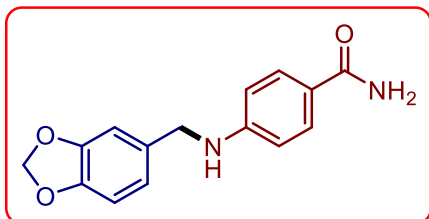

$^1H$  NMR (400 MHz, DMSO-*d*<sub>6</sub>)  $\delta$  7.63-7.60 (m, 2H), 7.53 (s, 1H), 6.91-6.81 (m, 4H), 6.71 (t, 1H), 6.56 (d, 2H), 5.97 (s, 1H), 4.22 (d, 2H) ppm.  $^{13}C\{^1H\}$  NMR (101 MHz, DMSO-*d*<sub>6</sub>)  $\delta$  168.0, 151.0, 147.3, 146.0, 133.6, 129.0, 121.2, 120.3, 111.1, 108.1, 107.7, 100.8, 45.8 ppm. HRMS (ESI):  $m/z$  = 271.1085, calcd. for  $C_{15}H_{14}N_2O_3H$   $[M + H]^+$  : 271.1083.

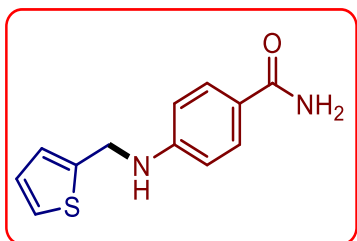

$^1H$  NMR (400 MHz, DMSO-*d*<sub>6</sub>)  $\delta$  7.62 (d, 2H), 7.54 (s, 1H), 7.37 (d, 1H), 7.05 (d, 1H), 6.97-6.95 (m, 1H), 6.86 (s, 1H), 6.78 (t, 1H), 6.61 (d, 2H), 4.50 (d, 2H) ppm.  $^{13}C\{^1H\}$  NMR (101 MHz, DMSO-*d*<sub>6</sub>)  $\delta$  168.4, 151.2, 144.1, 129.4, 127.2, 125.5, 125.1, 122.0, 111.7, 41.9 ppm. HRMS (ESI):  $m/z$  = 233.0743, calcd. for  $C_{12}H_{12}N_2SOH$   $[M + H]^+$  : 233.0749.

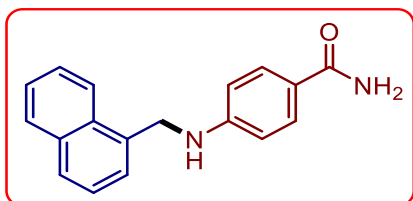

$^1H$  NMR (400 MHz, DMSO-*d*<sub>6</sub>)  $\delta$  8.14 (d, 1H), 7.96 (d, 1H), 7.84 (d, 1H), 7.68 (d, 2H), 7.59-7.43 (m, 5H), 6.91 (s, 1H), 6.81 (t, 1H), 6.66 (d, 2H), 4.78 (d, 2H) ppm.  $^{13}C\{^1H\}$  NMR (101 MHz, DMSO-*d*<sub>6</sub>)  $\delta$  168.6, 151.8, 134.9, 133.9, 131.6, 129.6, 129.0, 127.9, 126.6, 126.3, 125.9, 125.5, 124.0, 121.6, 111.4, 44.7 ppm. HRMS (ESI):  $m/z$  = 277.1342, calcd. for  $C_{18}H_{16}N_2OH$   $[M + H]^+$  : 277.1341.

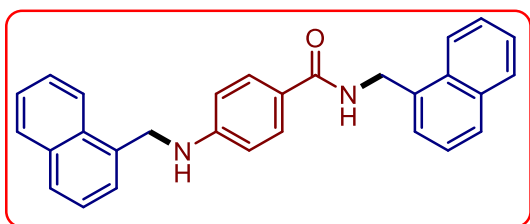

$^1\text{H}$  NMR (500 MHz,  $\text{CDCl}_3$ )  $\delta$  8.09 (d, 1H), 8.00-7.97 (m, 1H), 7.89-7.86(m, 2H), 7.81 (t, 2H), 7.63 (d, 2H), 7.54-7.39 (m, 9H), 6.60 (d, 2H), 6.18 (t, 1H), 5.07 (d, 2H), 4.74 (d, 2H), 4.33 (s, 1H) ppm.  $^{13}\text{C}\{^1\text{H}\}$  NMR (126 MHz,  $\text{CDCl}_3$ )  $\delta$  167.1, 151.0, 134.1, 133.6, 131.8, 131.6, 129.0, 129.0, 128.9, 128.7, 128.6, 126.9, 126.8, 126.6, 126.2, 126.1, 126.1, 126.1, 125.6, 125.6, 123.8, 123.4, 123.0, 112.0, 46.1, 42.4 ppm. HRMS (ESI):  $m/z = 417.1984$ , calcd. for  $\text{C}_{29}\text{H}_{24}\text{N}_2\text{OH}$  [ $\text{M} + \text{H}$ ] $^+$  : 417.1967.

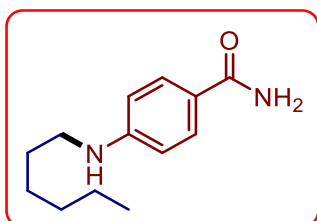

$^1\text{H}$  NMR (400 MHz,  $\text{DMSO-}d_6$ )  $\delta$  7.63 (d, 2H), 7.52 (s, 1H), 6.83 (s, 1H), 6.52 (d, 2H), 6.11 (t, 1H), 3.03 (q, 2H), 1.52 (q, 2H), 1.37-1.27 (m, 6H), 0.87 (t, 3H) ppm.  $^{13}\text{C}\{^1\text{H}\}$  NMR (101 MHz,  $\text{DMSO-}d_6$ )  $\delta$  168.0, 151.5, 129.1, 120.5, 110.5, 42.4, 40.1, 39.9, 39.5, 39.3, 38.9, 31.1, 28.5, 26.3, 22.1, 13.9 ppm. HRMS (ESI):  $m/z = 221.1657$ , calcd. for  $\text{C}_{13}\text{H}_{20}\text{N}_2\text{OH}$  [ $\text{M} + \text{H}$ ] $^+$  : 221.1654.

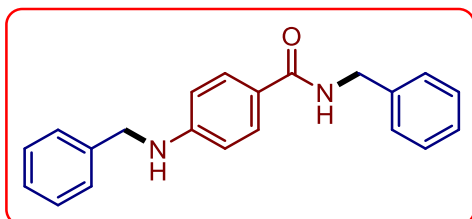

$^1\text{H}$  NMR (400 MHz,  $\text{CDCl}_3$ )  $\delta$  7.64 (d, 2H), 7.34-7.27 (m, 10H), 6.61-6.57 (m, 2H), 4.61 (t, 2H), 4.36 (d, 2H) ppm.  $^{13}\text{C}\{^1\text{H}\}$  NMR (101 MHz,  $\text{CDCl}_3$ )  $\delta$  167.4, 150.9, 138.8, 138.7, 128.8, 128.8, 128.7, 128.7, 127.9, 127.5, 127.4, 122.6, 112.0, 47.7, 43.9 ppm. HRMS (ESI):  $m/z = 317.1657$ , calcd. for  $\text{C}_{21}\text{H}_{20}\text{N}_2\text{OH}$  [ $\text{M} + \text{H}$ ] $^+$  : 317.1654.

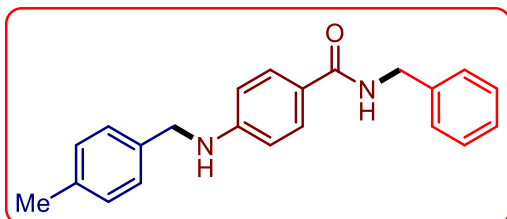

$^1\text{H}$  NMR (400 MHz,  $\text{CDCl}_3$ )  $\delta$  7.55 (d, 2H), 7.25 (d, 4H), 7.21-7.17 (m, 1H), 7.15-7.05 (m, 4H), 6.52 (d, 2H), 6.21 (s, 1H), 4.53 (d, 2H), 4.23 (s, 2H), 2.26 (s, 3H) ppm.  $^{13}\text{C}\{^1\text{H}\}$  NMR (101 MHz,  $\text{CDCl}_3$ )  $\delta$  167.3, 150.7, 138.8, 137.3, 135.4, 129.5, 128.8, 128.0, 127.6, 127.5, 123.0, 112.3, 47.8, 44.1, 21.2 ppm. HRMS (ESI):  $m/z = 331.1810$ , calcd. for  $\text{C}_{22}\text{H}_{22}\text{N}_2\text{OH}$  [ $\text{M} + \text{H}$ ] $^+$  : 331.1810.



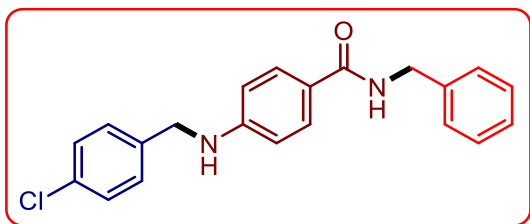

$^1\text{H}$  NMR (400 MHz,  $\text{CDCl}_3$ )  $\delta$  7.55 (d, 2H), 7.23-7.05 (m, 8H), 6.49-6.47 (m, 2H), 6.22 (s, 1H), 4.52 (d, 2H), 4.26 (s, 2H) ppm.  $^{13}\text{C}\{^1\text{H}\}$  (101 MHz,  $\text{CDCl}_3$ )  $\delta$  167.3, 150.6, 138.8, 137.2, 133.3, 129.0, 128.8, 128.7, 128.0, 127.6, 123.1, 112.2, 47.2, 44.1 ppm. HRMS (ESI):  $m/z$  = 351.1262, calcd. for  $\text{C}_{21}\text{H}_{19}\text{N}_2\text{ClOH}$   $[\text{M} + \text{H}]^+$  : 351.1264.

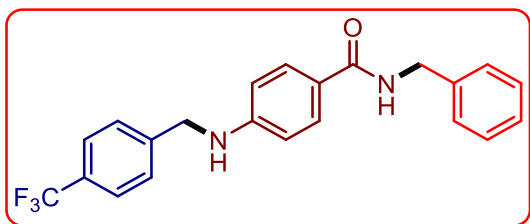

$^1\text{H}$  NMR (400 MHz,  $\text{CDCl}_3$ )  $\delta$  7.56-7.50 (m, 4H), 7.37 (d, 2H), 7.28-7.17 (m, 6H), 6.50 (d, 2H), 6.20 (t, 1H), 4.52 (d, 2H), 4.37 (s, 2H) ppm.  $^{13}\text{C}\{^1\text{H}\}$  NMR (101 MHz,  $\text{CDCl}_3$ )  $\delta$  167.2, 150.3, 142.9, 138.8, 128.9, 128.8, 128.0, 127.7, 127.5, 125.8 (q,  $J$  (C, F) = 3.72 Hz), 123.5, 112.4, 47.5, 44.1 ppm. HRMS (ESI):  $m/z$  = 385.1525, calcd. for  $\text{C}_{22}\text{H}_{19}\text{F}_3\text{N}_2\text{OH}$   $[\text{M} + \text{H}]^+$  : 385.1528.

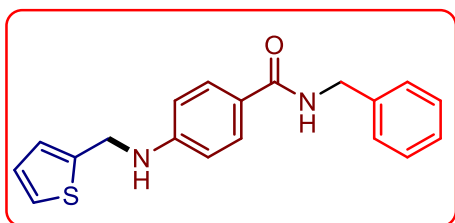

$^1\text{H}$  NMR (400 MHz,  $\text{CDCl}_3$ )  $\delta$  7.57 (d, 2H), 7.29-7.13 (m, 6H), 7.14 (d, 1H), 6.94 (s, 1H), 6.88 (t, 1H), 6.57 (d, 2H), 6.21 (t, 1H), 4.53 (d, 2H), 4.46 (s, 2H) ppm.  $^{13}\text{C}\{^1\text{H}\}$  NMR (101 MHz,  $\text{CDCl}_3$ )  $\delta$  167.3, 150.1, 141.8, 138.8, 128.8, 128.7, 128.0, 127.6, 127.1, 125.6, 125.0, 123.6, 112.6, 44.1, 43.2 ppm. HRMS (ESI):  $m/z$  = 323.1215, calcd. for  $\text{C}_{19}\text{H}_{18}\text{N}_2\text{SOH}$   $[\text{M} + \text{H}]^+$  : 323.1218.

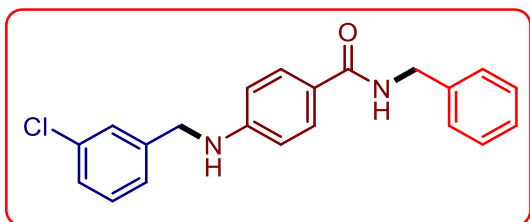

$^1\text{H}$  NMR (400 MHz,  $\text{CDCl}_3$ )  $\delta$  7.56 (d, 2H), 7.27-7.13 (m, 10H), 6.51 (d, 2H), 6.19 (s, 1H), 4.54 (d, 2H), 4.28 (s, 2H) ppm.  $^{13}\text{C}\{^1\text{H}\}$  NMR (101 MHz,  $\text{CDCl}_3$ )  $\delta$  167.2, 150.4, 140.9, 138.8,

134.8, 130.2, 129.0, 129.0, 128.9, 128.9, 128.0, 127.8, 127.6, 127.5, 125.5, 123.5, 112.4, 47.5, 44.1 ppm. HRMS (ESI):  $m/z = 351.1263$ , calcd. for  $C_{21}H_{19}N_2ClOH$   $[M + H]^+$  : 351.1264.

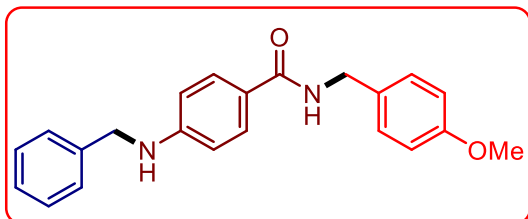

$^1H$  NMR (400 MHz,  $CDCl_3$ )  $\delta$  7.52 (d, 2H), 7.24-7.15 (m, 7H), 6.76 (d, 2H), 6.51 (d, 2H), 6.13 (t, 1H), 4.43 (d, 2H), 4.26 (s, 2H), 3.69 (s, 3H) ppm.  $^{13}C\{^1H\}$  NMR (101 MHz,  $CDCl_3$ )  $\delta$  167.2, 159.1, 150.2, 138.3, 130.9, 129.4, 128.9, 128.8, 127.7, 127.7, 123.5, 114.2, 112.6, 55.4, 48.2, 43.6 ppm. HRMS (ESI):  $m/z = 347.1760$ , calcd. for  $C_{22}H_{22}N_2O_2H$   $[M + H]^+$  : 347.1760.

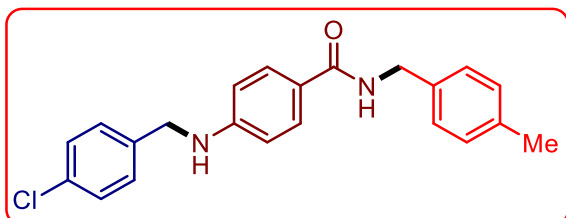

$^1H$  NMR (400 MHz,  $CDCl_3$ )  $\delta$  7.54 (d, 2H), 7.23-7.05 (m, 8H), 6.48 (d, 2H), 6.14 (s, 1H), 4.48 (d, 2H), 4.41 (s, 1H), 4.26 (s, 2H), 2.26 (s, 3H) ppm.  $^{13}C\{^1H\}$  NMR (101 MHz,  $CDCl_3$ )  $\delta$  167.2, 150.5, 137.3, 137.2, 135.7, 133.3, 129.5, 129.0, 128.8, 128.7, 128.0, 123.2, 112.1, 47.2, 43.9, 21.2 ppm. HRMS (ESI):  $m/z = 365.1412$ , calcd. for  $C_{22}H_{21}ClN_2OH$   $[M + H]^+$  : 365.1421.

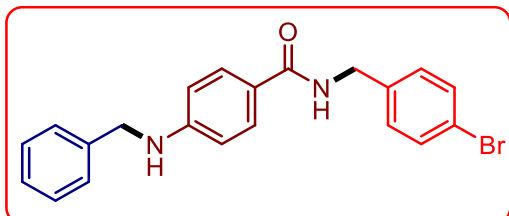

$^1H$  NMR (400 MHz,  $CDCl_3$ )  $\delta$  7.55 (d, 2H), 7.35 (d, 2H), 7.27-7.18 (m, 5H), 7.11 (d, 2H), 6.51 (d, 2H), 6.29 (t, 1H), 4.46 (d, 2H), 4.29 (s, 2H) ppm.  $^{13}C\{^1H\}$  NMR (101 MHz,  $CDCl_3$ )  $\delta$  167.4, 151.0, 138.6, 138.0, 131.8, 129.6, 128.9, 128.9, 127.6, 127.5, 122.6, 121.3, 112.1, 47.9, 43.3 ppm. HRMS (ESI):  $m/z = 395.0760$ , calcd. for  $C_{21}H_{19}N_2BrOH$   $[M + H]^+$  : 395.0759.

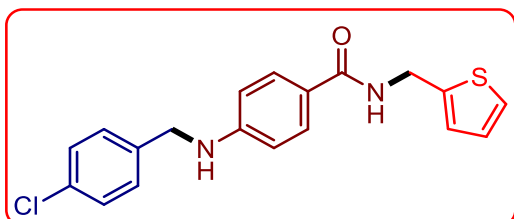

$^1H$  NMR (400 MHz,  $CDCl_3$ )  $\delta$  7.54 (d, 2H), 7.20 (q, 4H), 7.14 (d, 1H), 6.93 (d, 1H), 6.87 (t, 1H), 6.49 (d, 2H), 6.26 (s, 1H), 4.68 (d, 2H), 4.26 (s, 2H) ppm.  $^{13}C\{^1H\}$  NMR (101 MHz,

$\text{CDCl}_3$ )  $\delta$  167.0, 150.5, 141.5, 137.1, 133.3, 129.0, 128.9, 128.7, 127.0, 126.1, 125.3, 123.0, 112.3, 47.2, 38.8 ppm. HRMS (ESI):  $m/z$  = 357.0823, calcd. for  $\text{C}_{19}\text{H}_{17}\text{N}_2\text{ClSOH}$   $[\text{M} + \text{H}]^+$  : 357.0828.

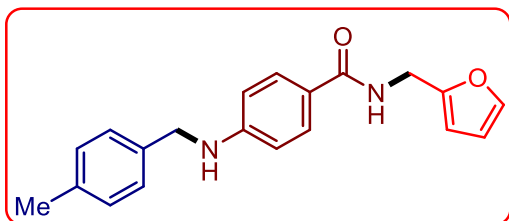

$^1\text{H}$  NMR (400 MHz,  $\text{CDCl}_3$ )  $\delta$  7.53 (d, 2H), 7.14-7.05 (m, 4H), 6.49 (d, 2H), 6.26 (t, 1H), 6.22 (d, 1H), 6.16 (s, 1H), 4.50 (d, 2H), 4.21 (s, 2H), 2.25 (s, 3H) ppm.  $^{13}\text{C}\{^1\text{H}\}$  NMR (101 MHz,  $\text{CDCl}_3$ )  $\delta$  167.2, 151.9, 150.9, 142.2, 137.2, 135.6, 129.5, 128.9, 127.5, 122.5, 112.0, 110.6, 107.5, 47.6, 37.0, 21.2 ppm. HRMS (ESI):  $m/z$  = 321.1600, calcd. for  $\text{C}_{20}\text{H}_{20}\text{N}_2\text{O}_2\text{H}$   $[\text{M} + \text{H}]^+$  : 321.1603.

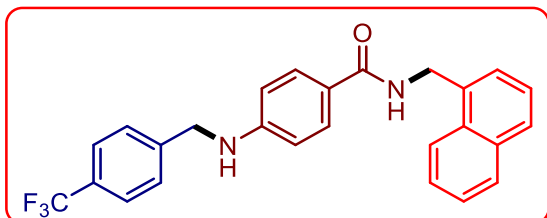

$^1\text{H}$  NMR (500 MHz,  $\text{CDCl}_3$ )  $\delta$  8.08-8.06 (m, 1H), 7.88 (dd, 1H), 7.82 (d, 1H), 7.58 (t, 4H), 7.54-7.41 (m, 9H), 6.52 (d, 2H), 6.19 (t, 1H), 5.05 (d, 2H), 4.54 (s, 1H), 4.42 (s, 2H) ppm.  $^{13}\text{C}\{^1\text{H}\}$  NMR (126 MHz,  $\text{CDCl}_3$ )  $\delta$  167.0, 150.4, 143.0, 134.1, 134.0, 131.7, 128.9, 128.8, 127.5, 126.9, 126.8, 126.1, 125.8 (q,  $J$  (C, F) = 3.7 Hz), 125.6, 123.8, 112.2, 47.4, 42.4 ppm. HRMS (ESI):  $m/z$  = 435.1701, calcd. for  $\text{C}_{26}\text{H}_{21}\text{N}_2\text{F}_3\text{OH}$   $[\text{M} + \text{H}]^+$  : 435.1684.

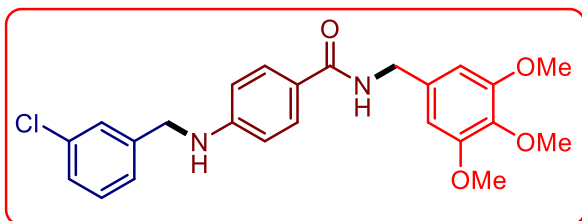

$^1\text{H}$  NMR (400 MHz,  $\text{CDCl}_3$ )  $\delta$  7.64 (d, 2H), 7.32 (s, 1H), 7.25-7.20 (m, 2H), 6.57 (d, 2H), 6.55 (s, 2H), 6.34 (t, 1H), 4.53 (d, 2H), 4.36 (s, 1H), 3.82 (d, 9H) ppm.  $^{13}\text{C}\{^1\text{H}\}$  NMR (101 MHz,  $\text{CDCl}_3$ )  $\delta$  167.3, 153.5, 150.6, 140.9, 137.3, 134.7, 134.5, 130.1, 128.9, 127.7, 127.4, 125.4, 123.0, 112.1, 105.0, 61.0, 56.2, 47.3, 44.4 ppm. HRMS (ESI):  $m/z$  = 441.1578, calcd. for  $\text{C}_{24}\text{H}_{25}\text{N}_2\text{ClO}_4\text{H}$   $[\text{M} + \text{H}]^+$  : 441.1581.

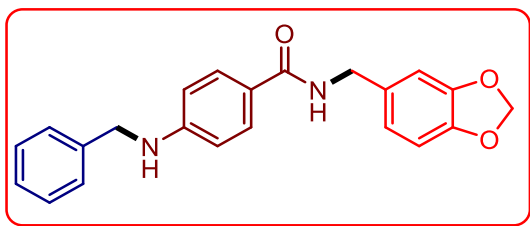

$^1\text{H}$  NMR (400 MHz,  $\text{CDCl}_3$ )  $\delta$  7.61 (d, 2H), 7.35-7.25 (m, 6H), 6.80-6.71 (m, 3H), 6.56 (d, 2H), 6.35 (t, 1H), 5.90 (s, 2H), 4.47 (d, 2H), 4.34 (s, 2H) ppm.  $^{13}\text{C}\{^1\text{H}\}$  NMR (101 MHz,  $\text{CDCl}_3$ )  $\delta$  167.3, 150.9, 147.9, 146.9, 138.7, 132.7, 128.8, 127.5, 127.5, 122.7, 121.1, 112.0, 108.6, 108.4, 101.1, 47.8, 43.8 ppm. HRMS (ESI):  $m/z = 361.1554$ , calcd. for  $\text{C}_{22}\text{H}_{20}\text{N}_2\text{O}_3\text{H}$   $[\text{M} + \text{H}]^+$  : 361.1552.

**$^1\text{H}$  and  $^{13}\text{C}\{^1\text{H}\}$  NMR spectra of isolated compounds 5a-5al in  $\text{CDCl}_3$  (\*) from catalytic reactions**

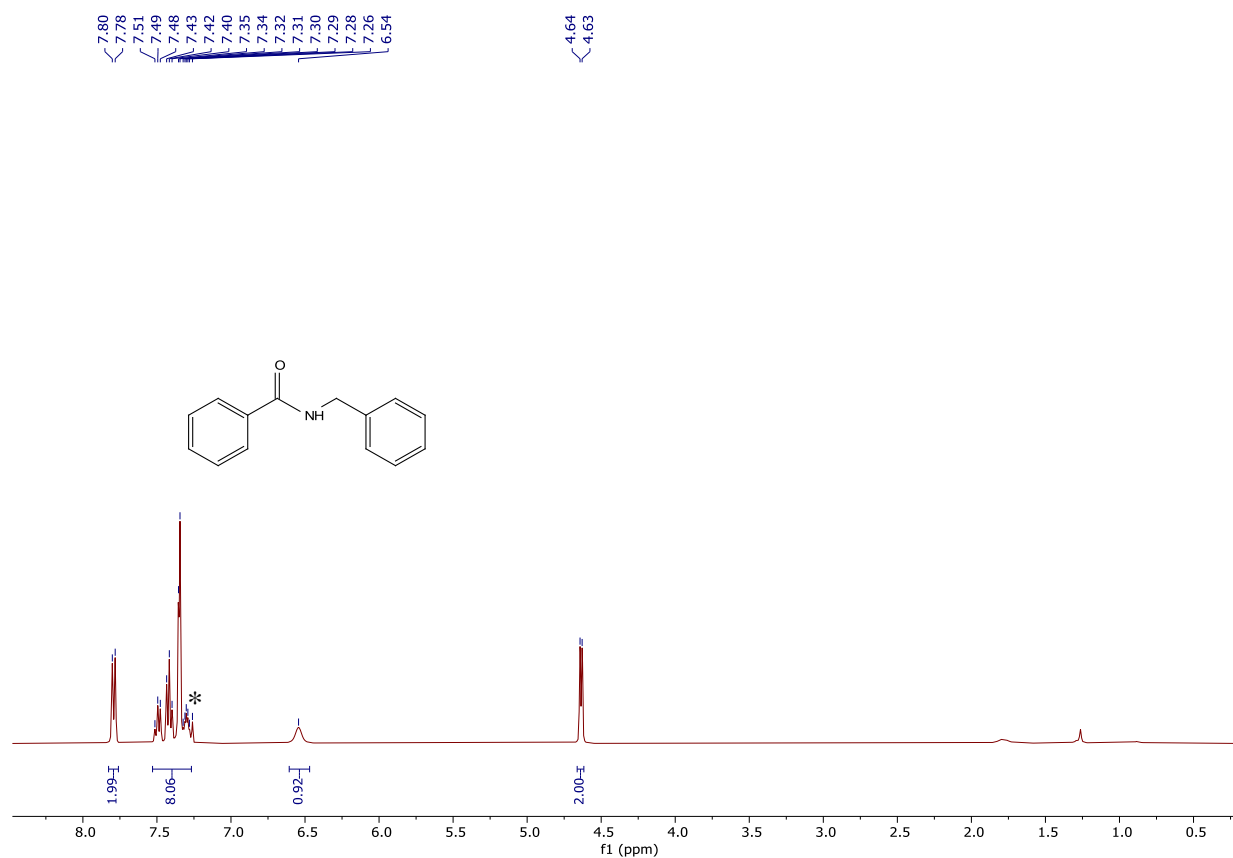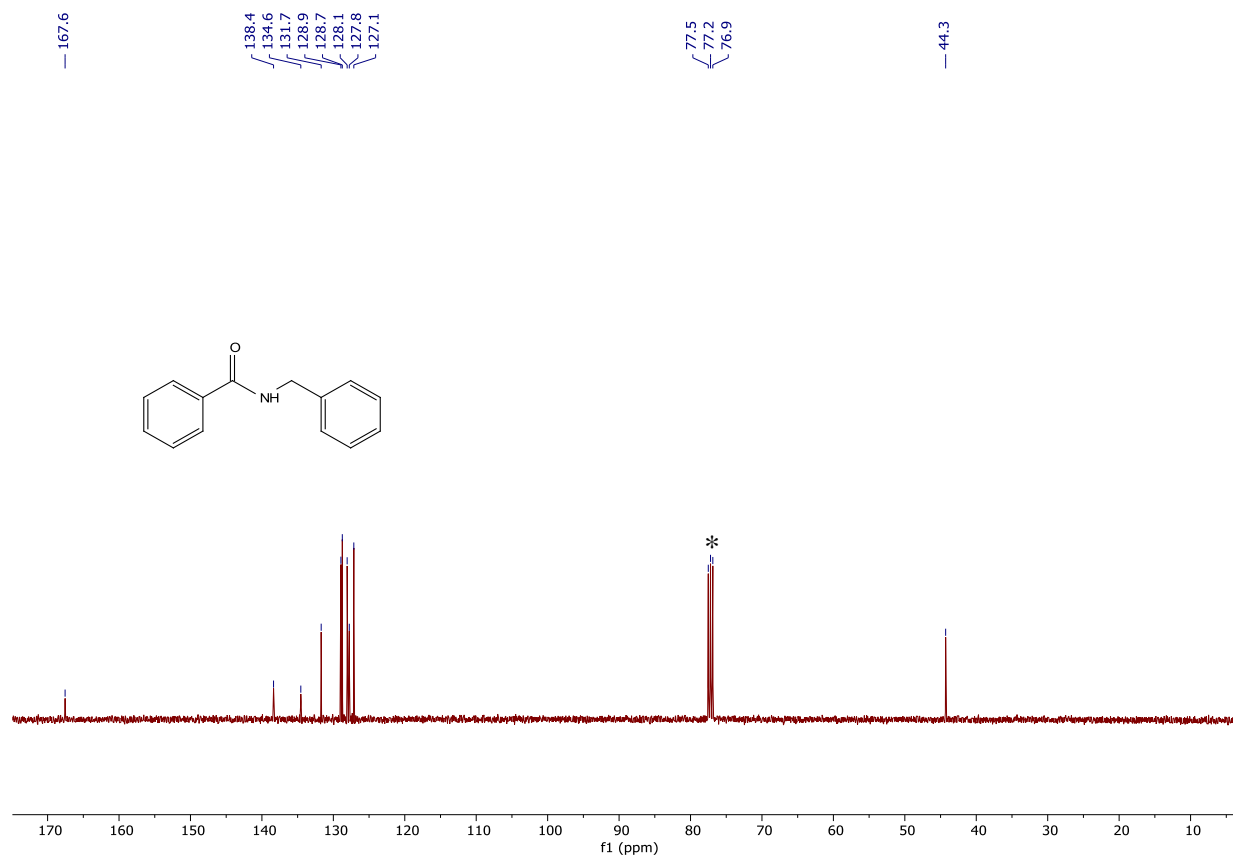

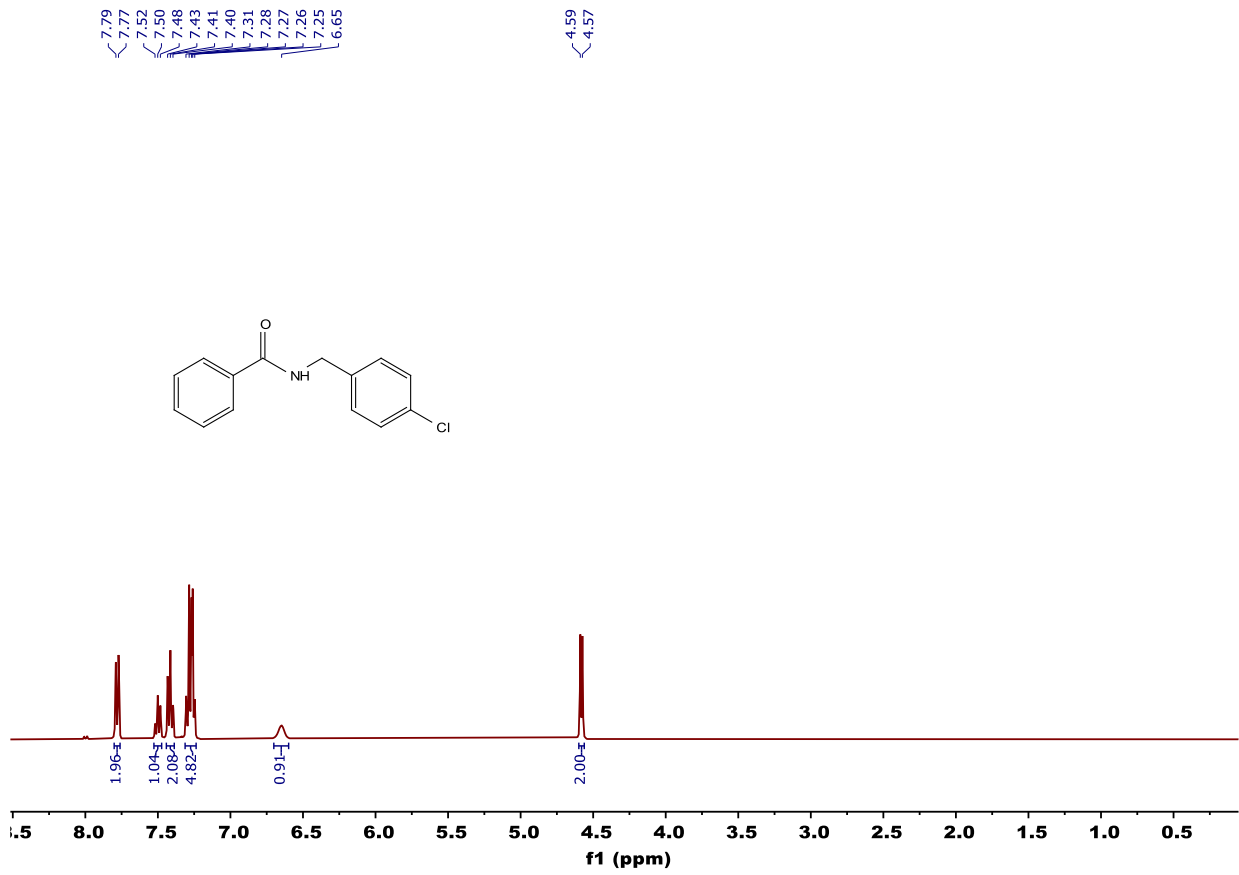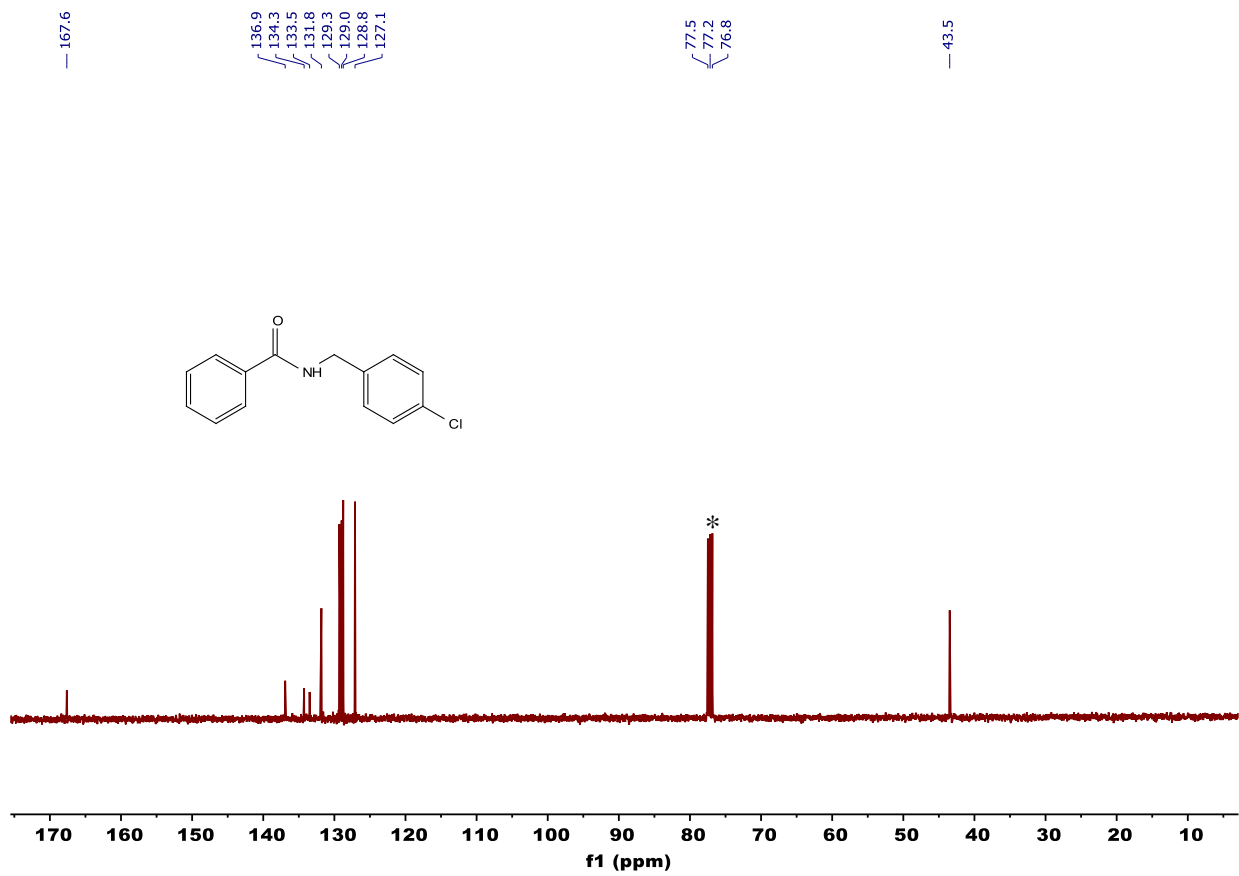

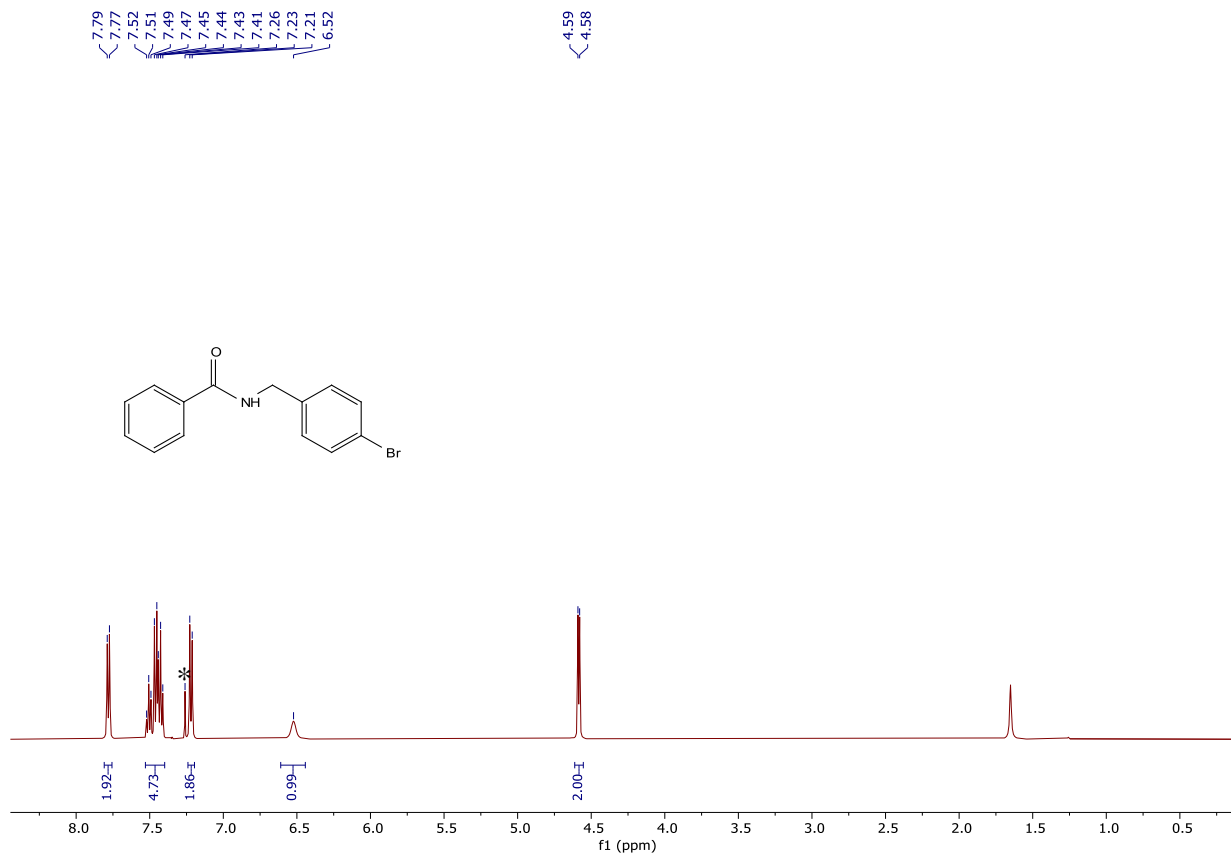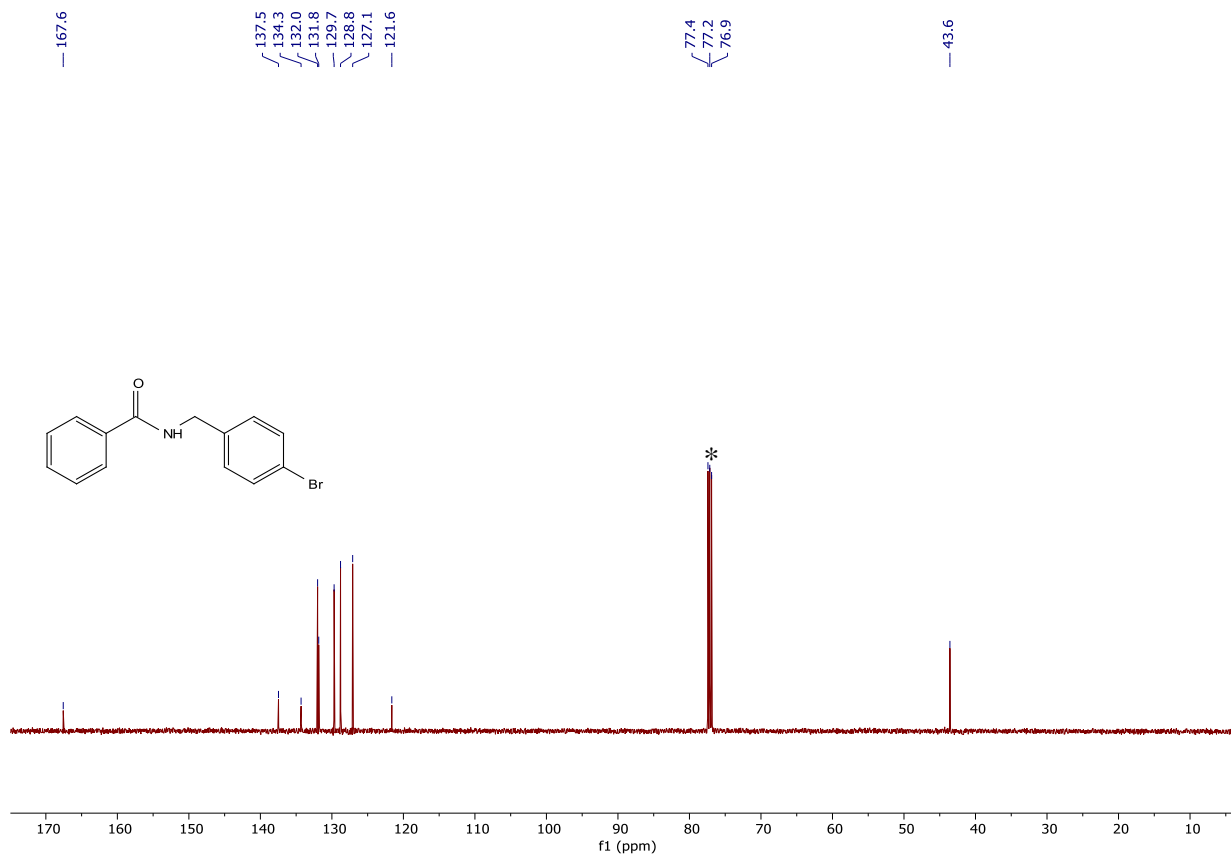

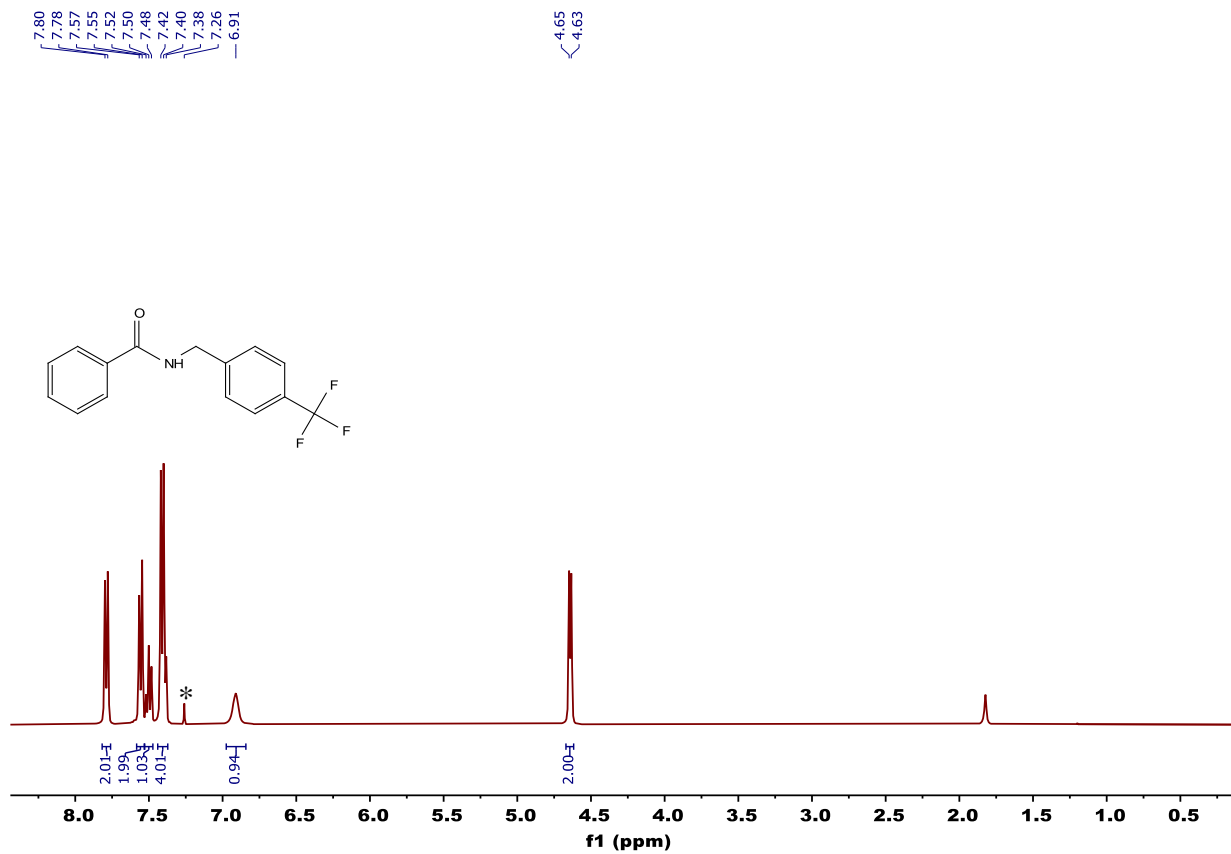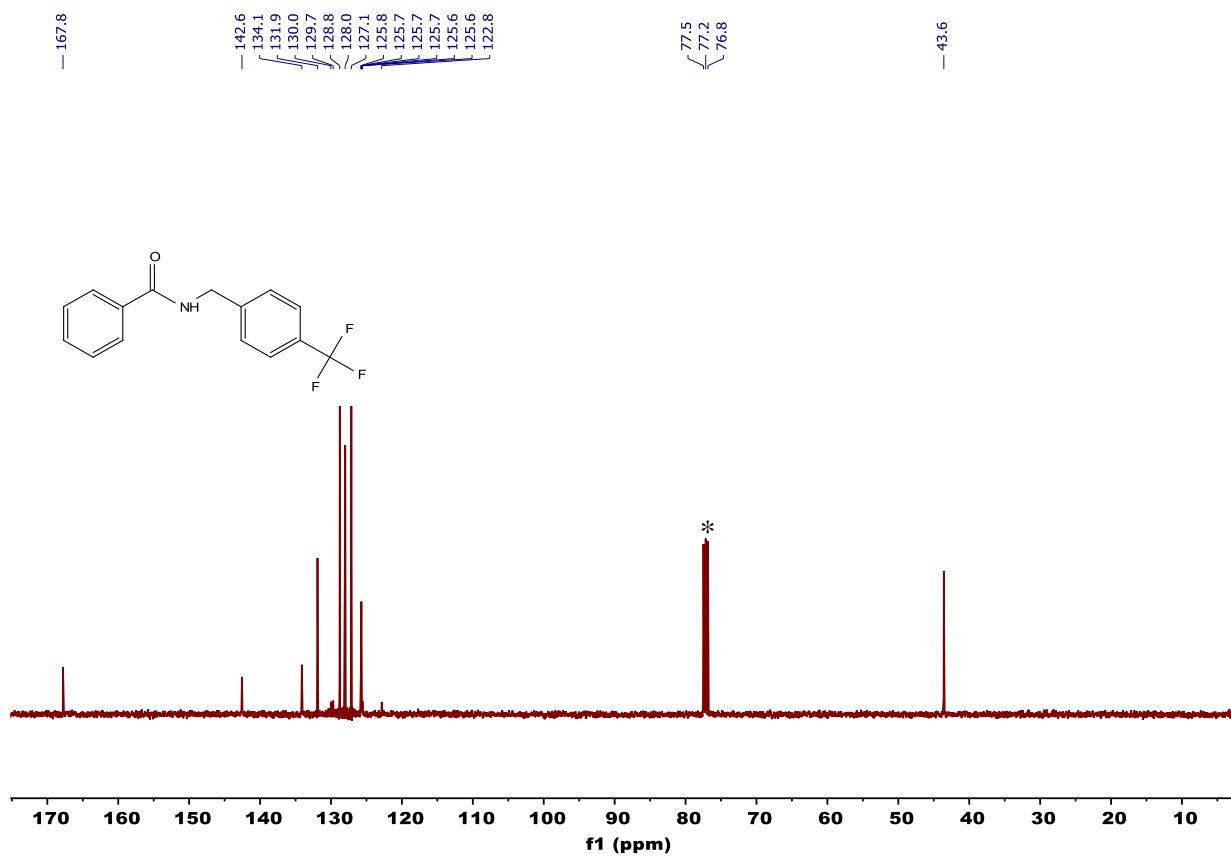



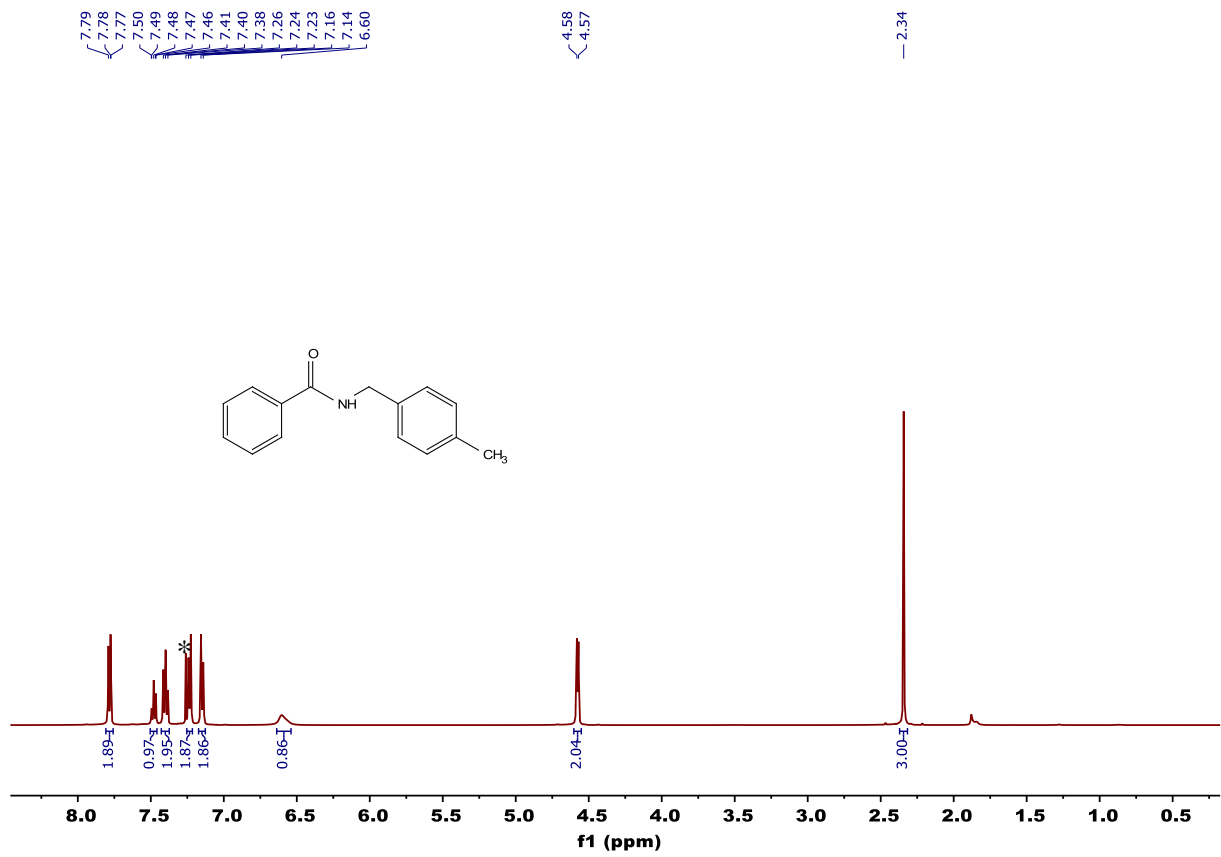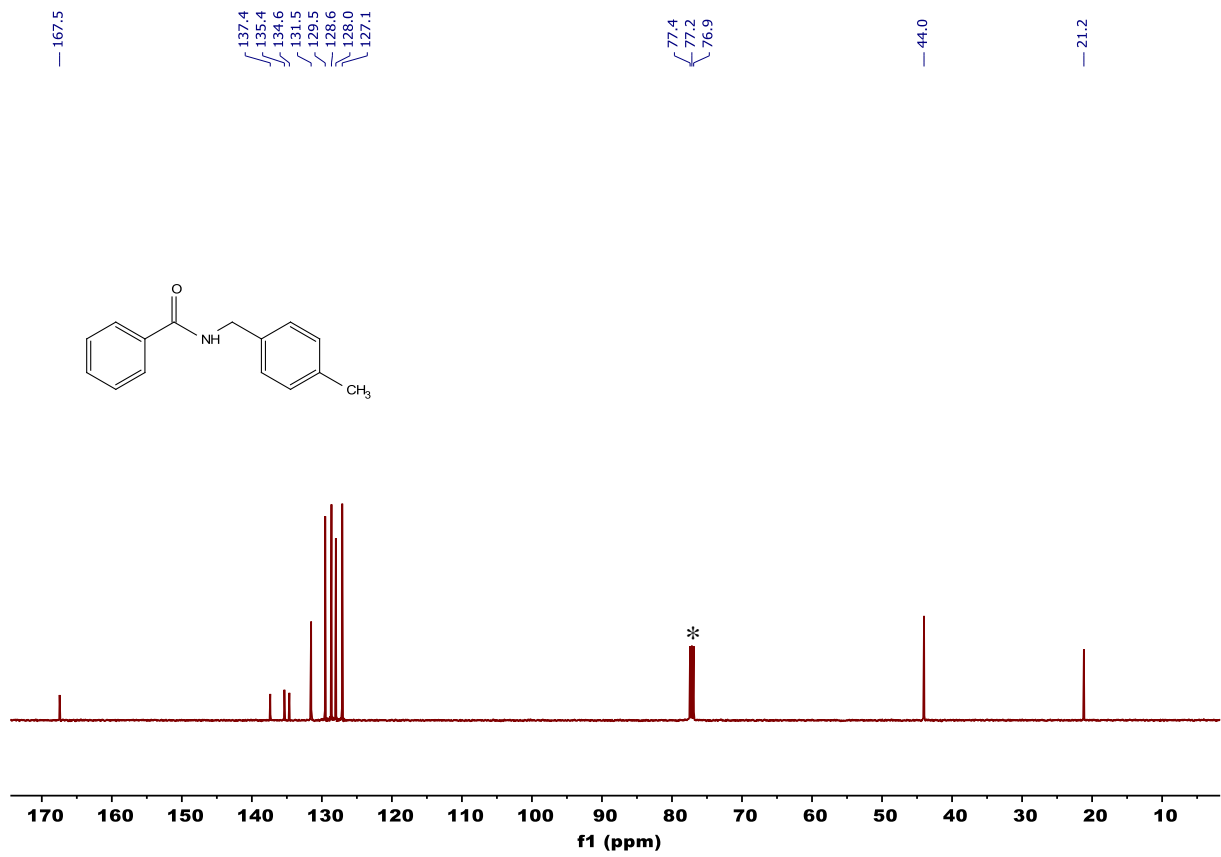

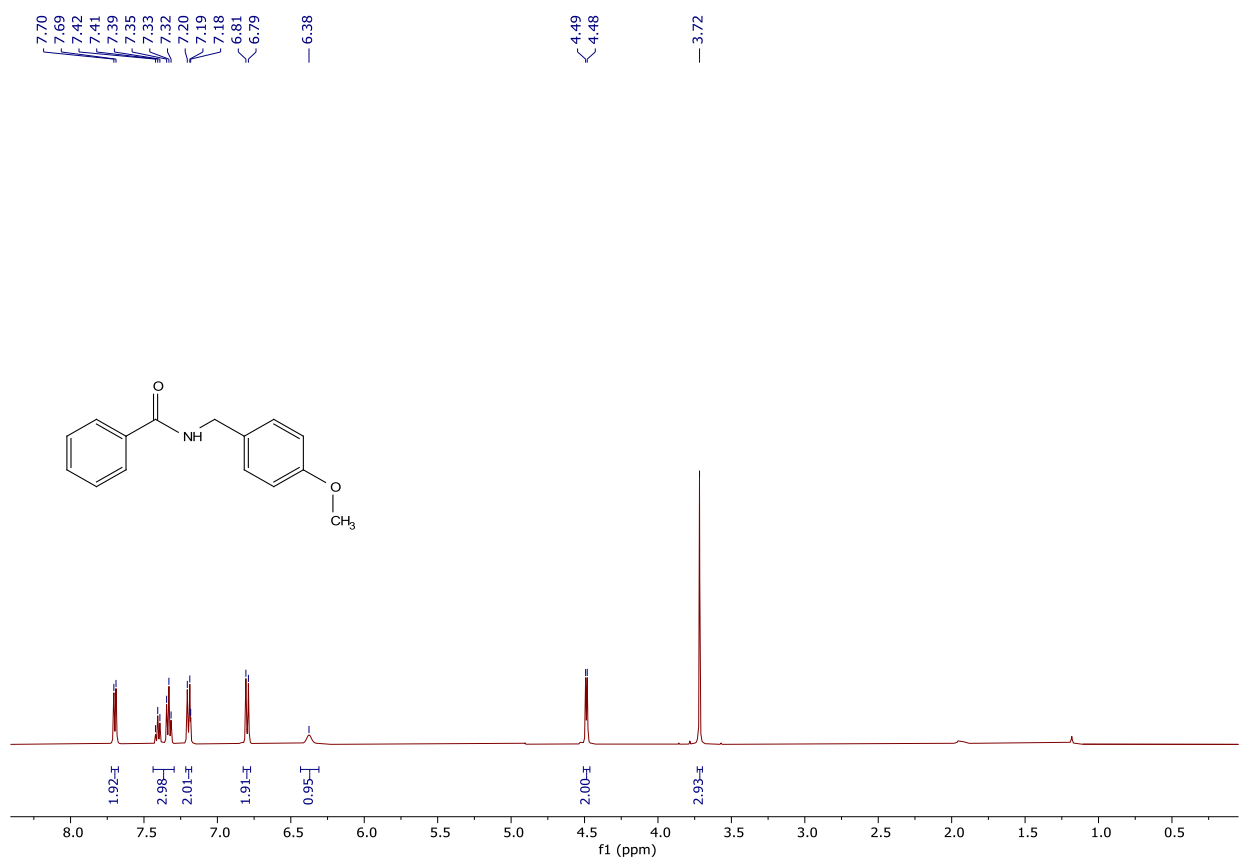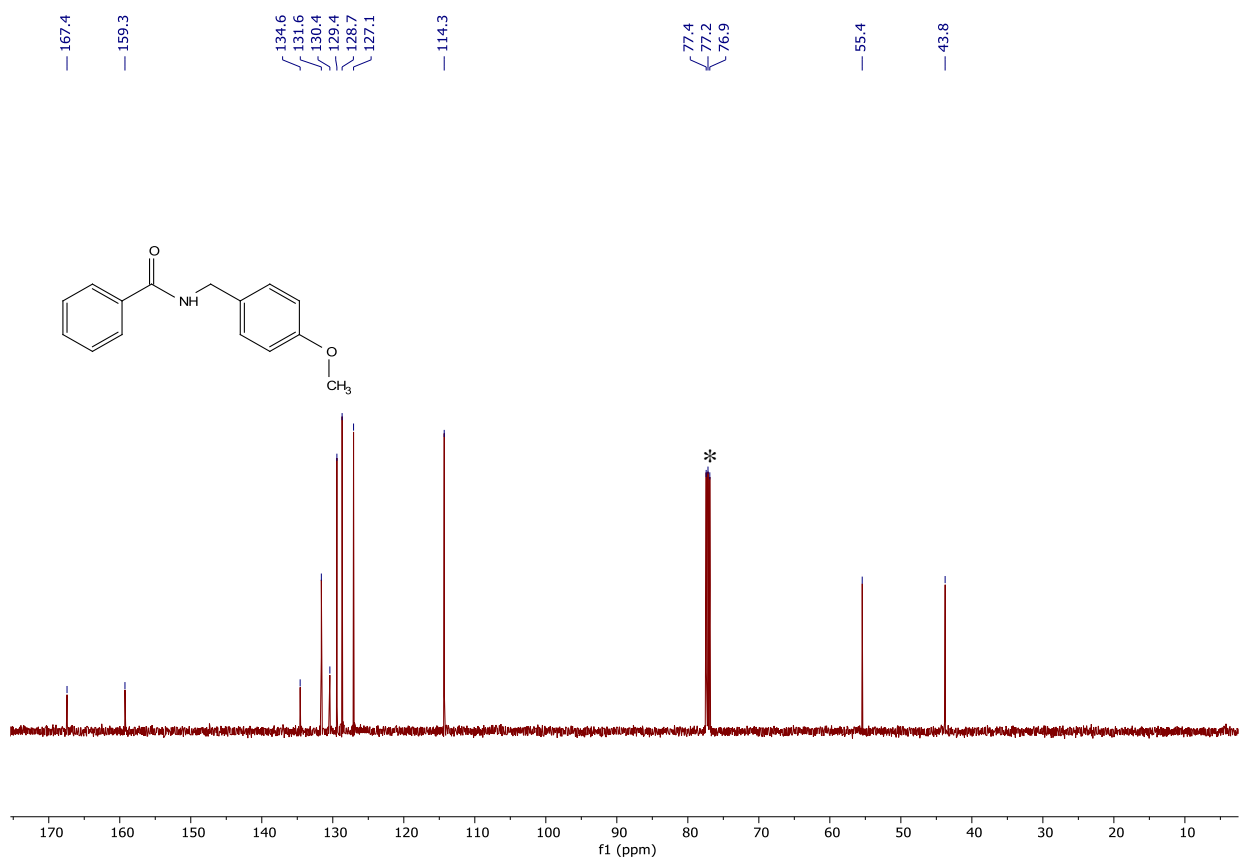

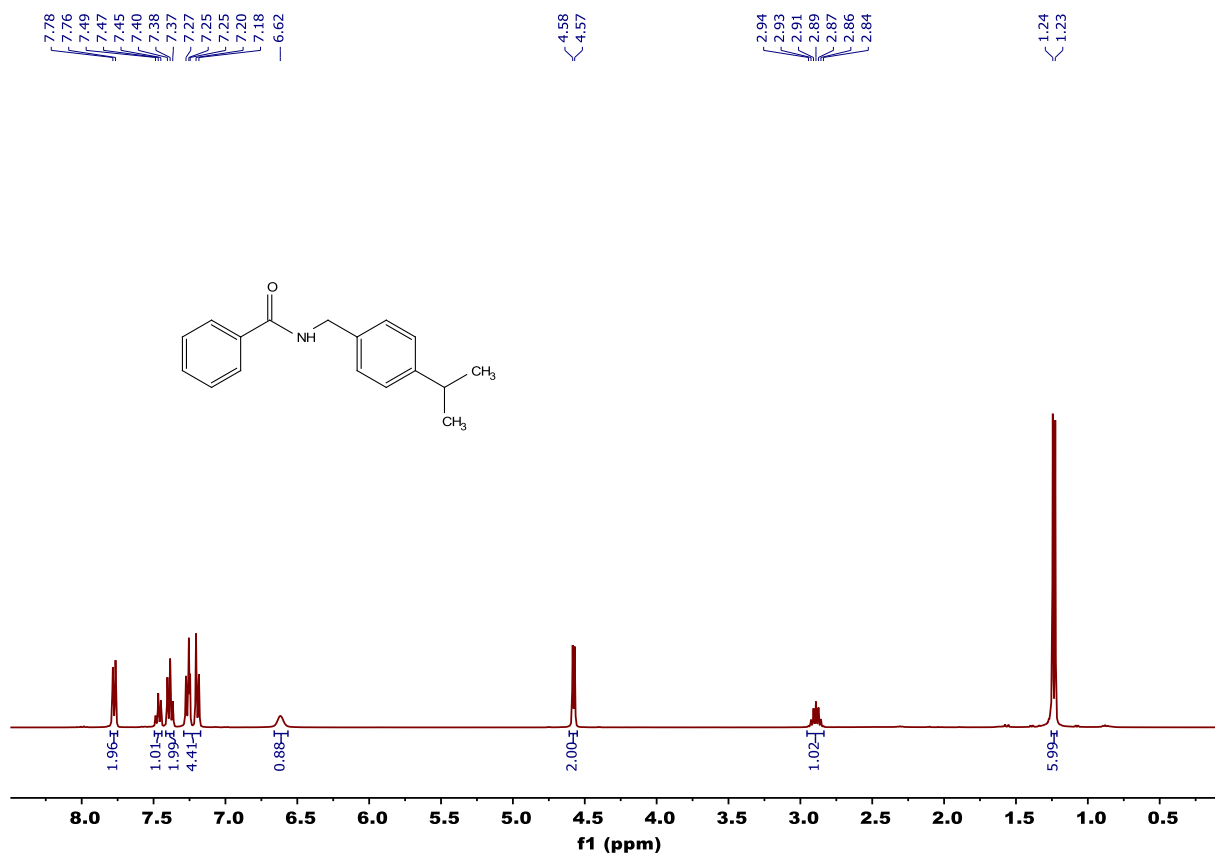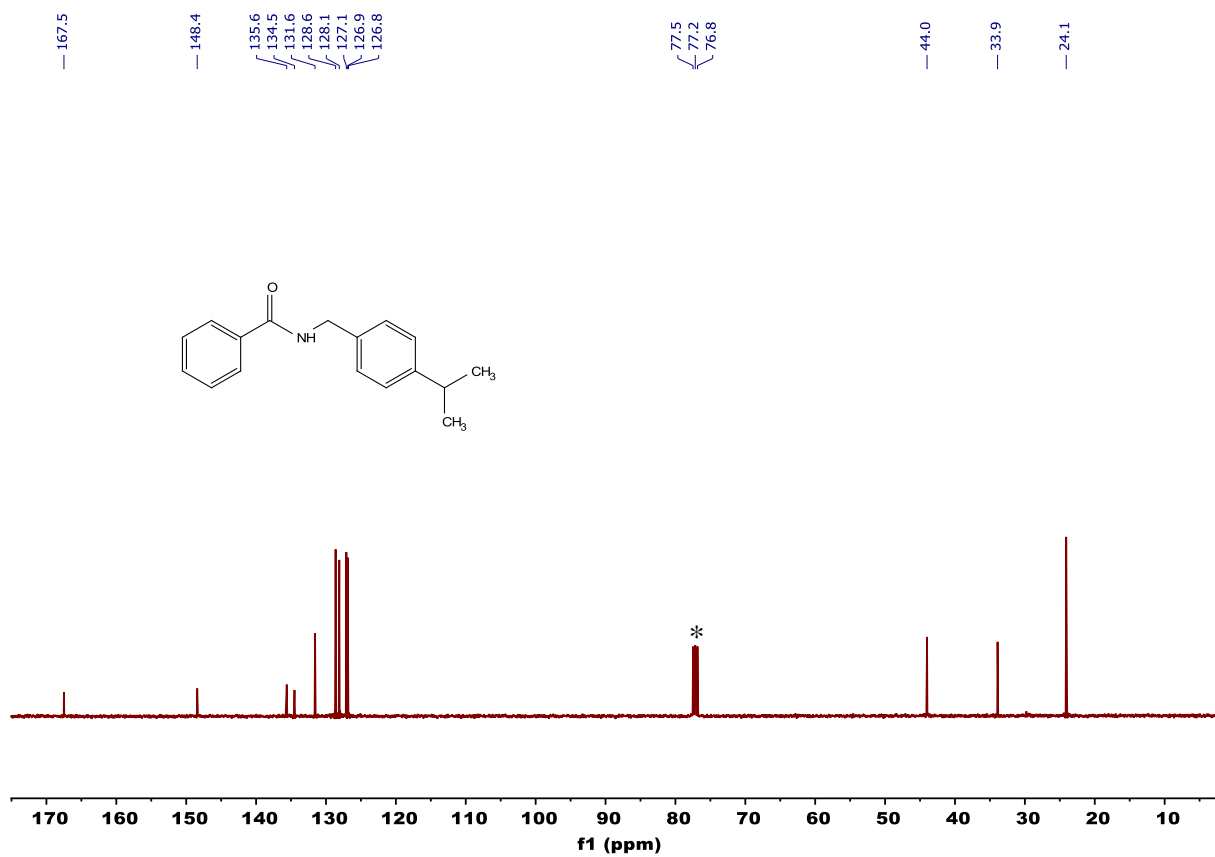

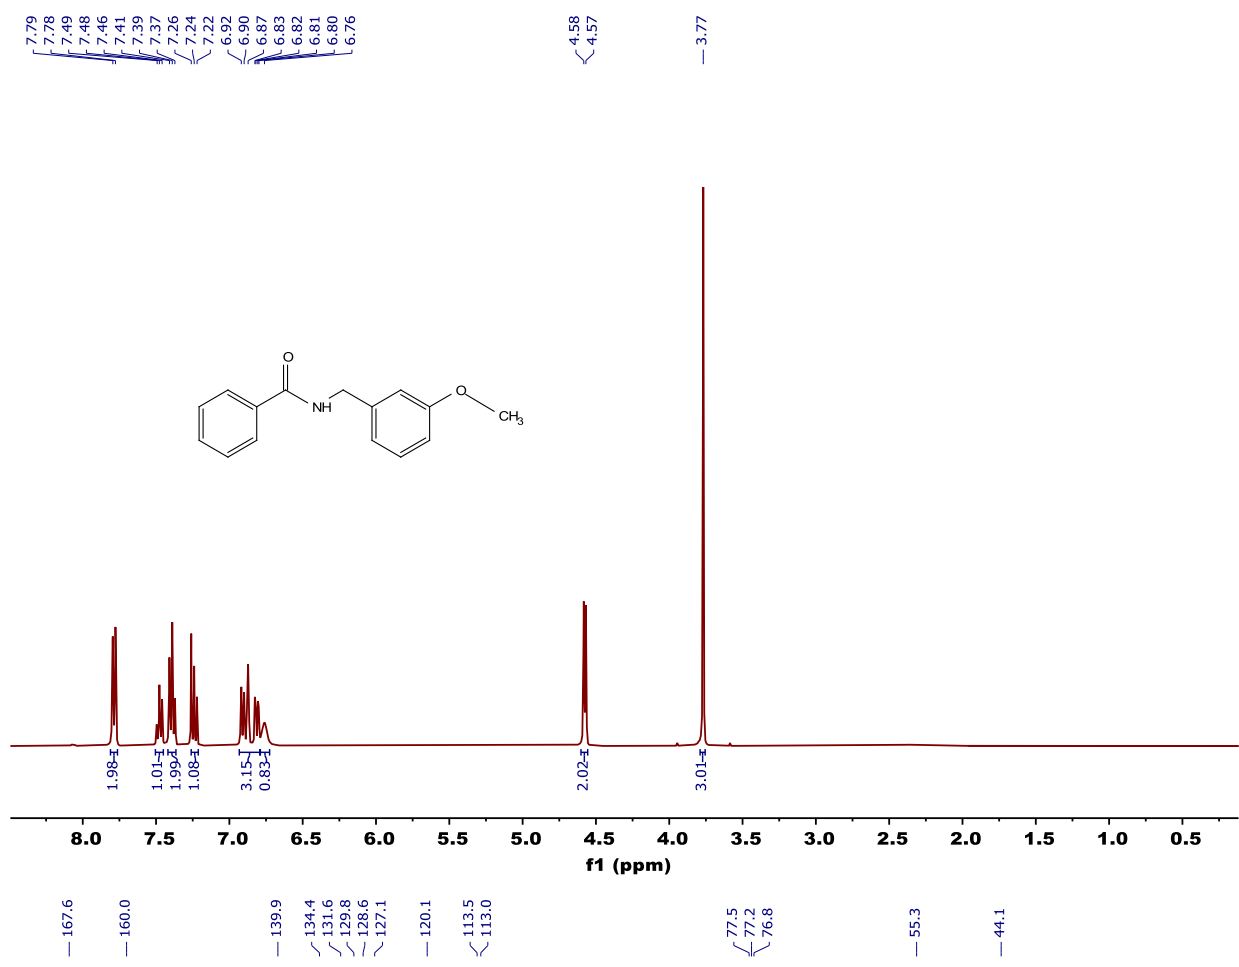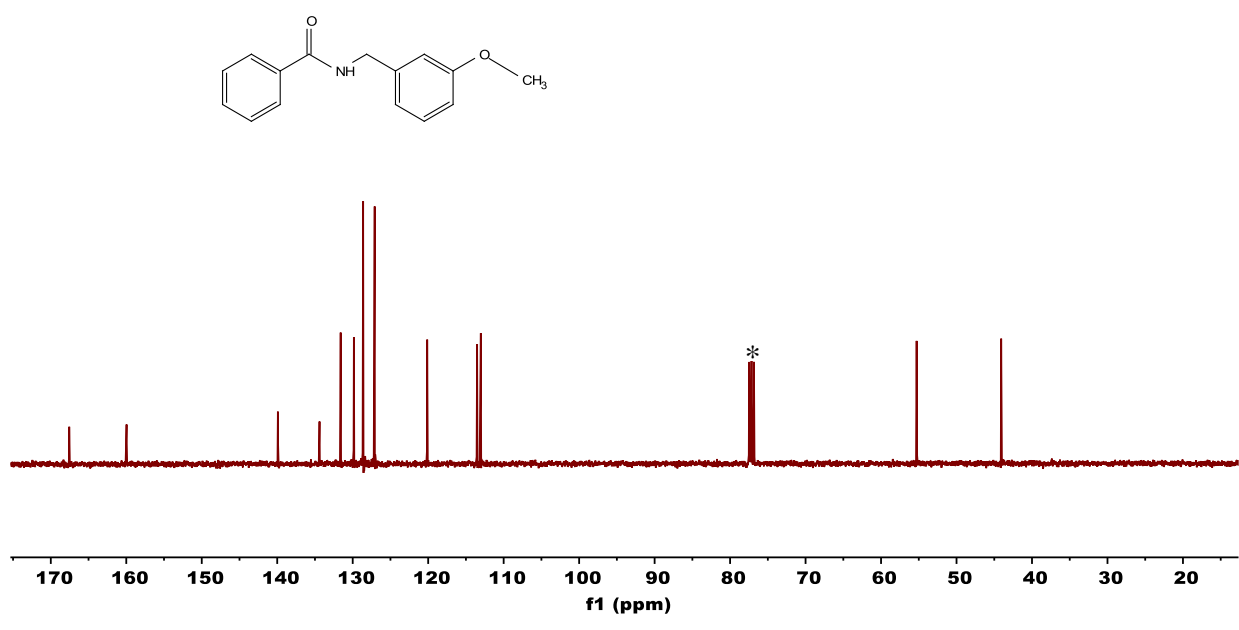

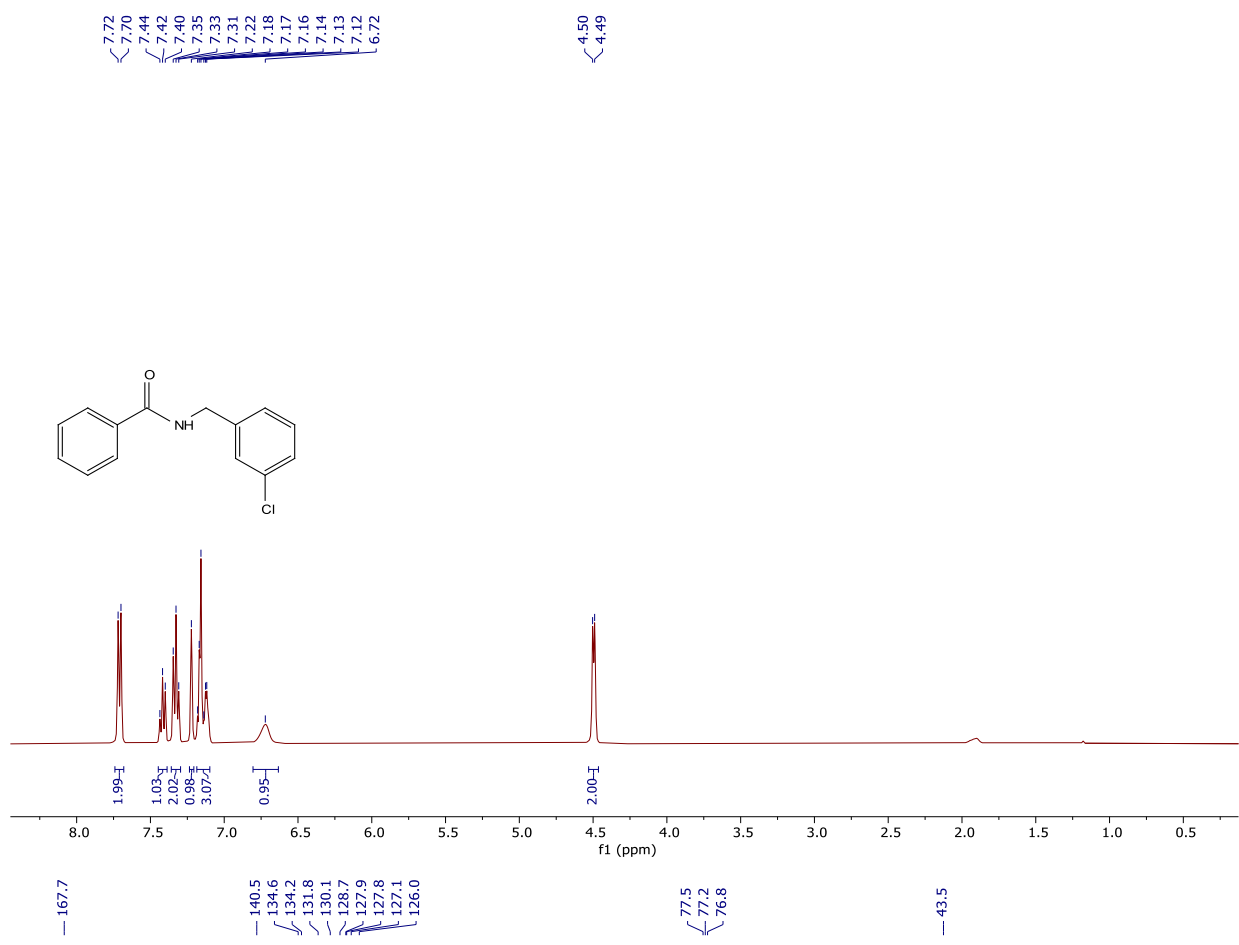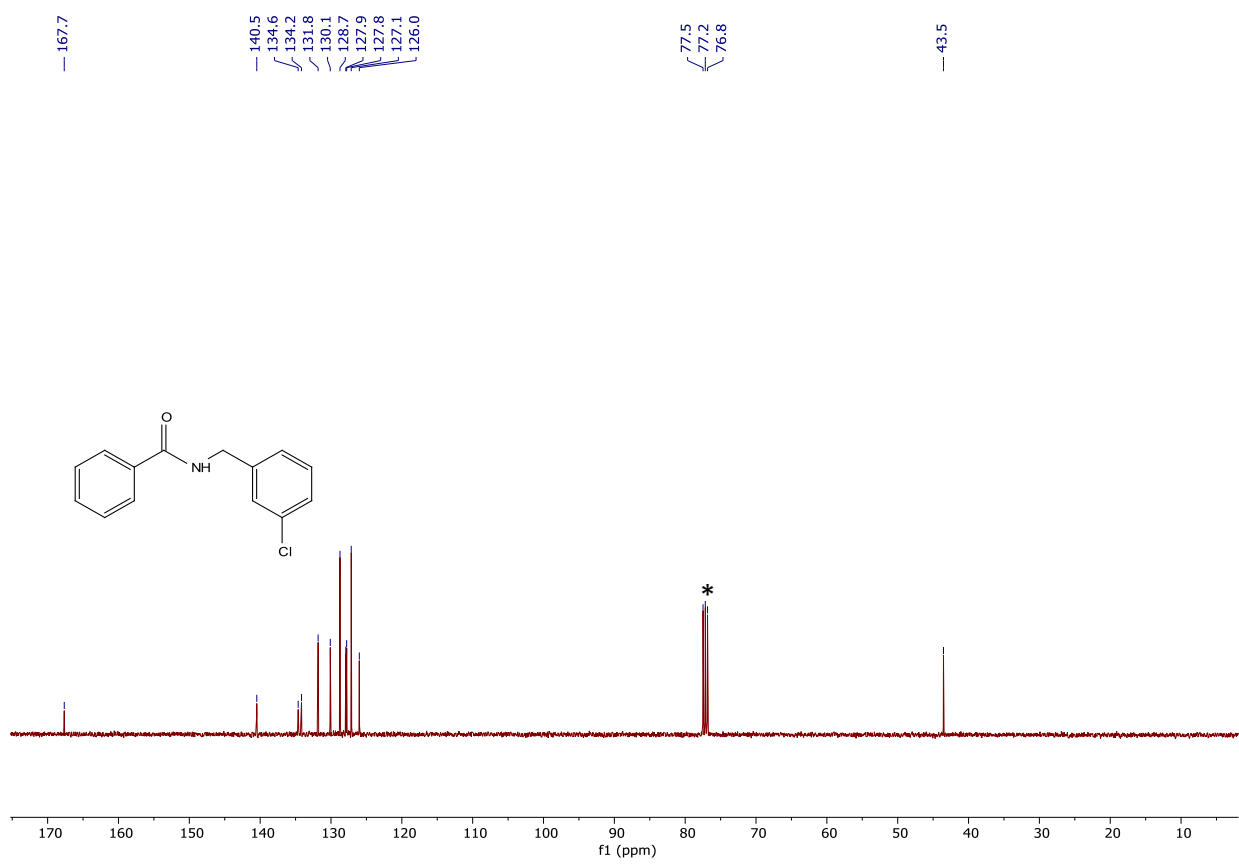

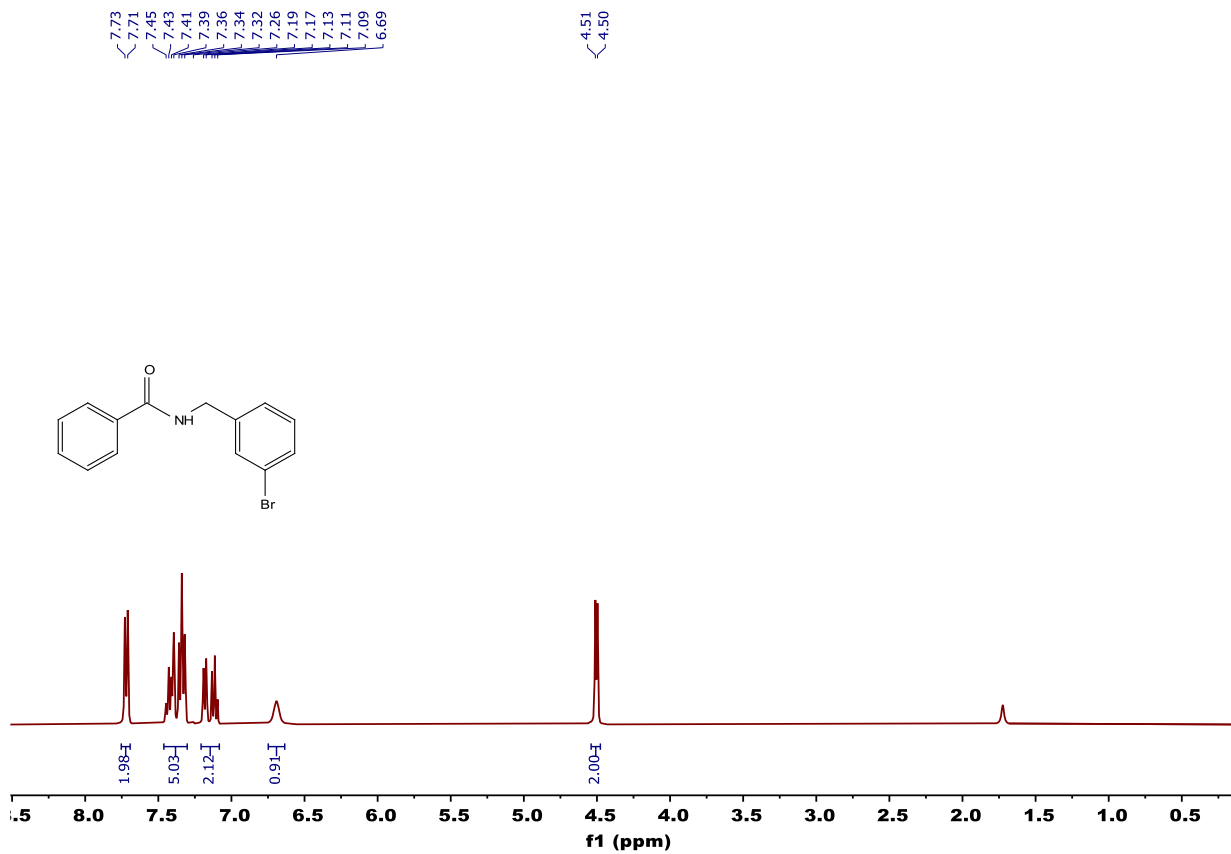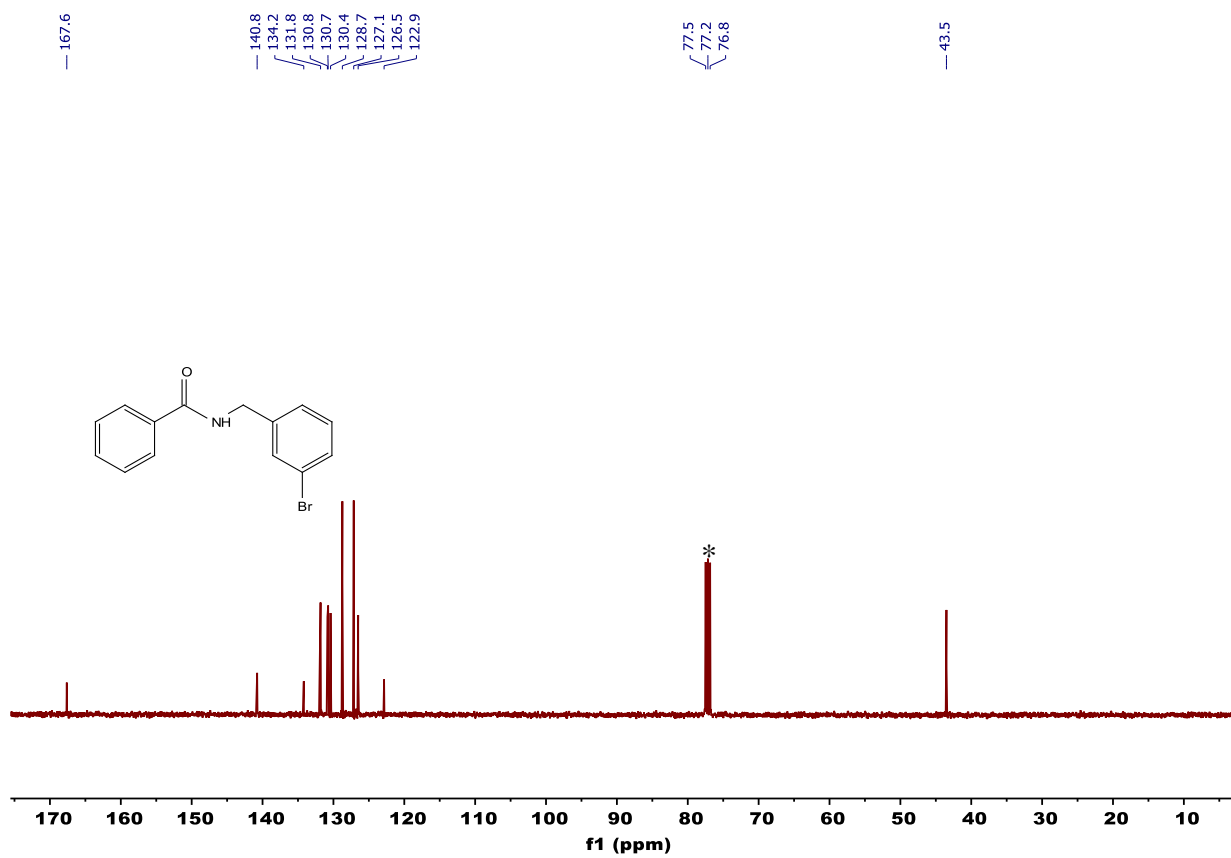

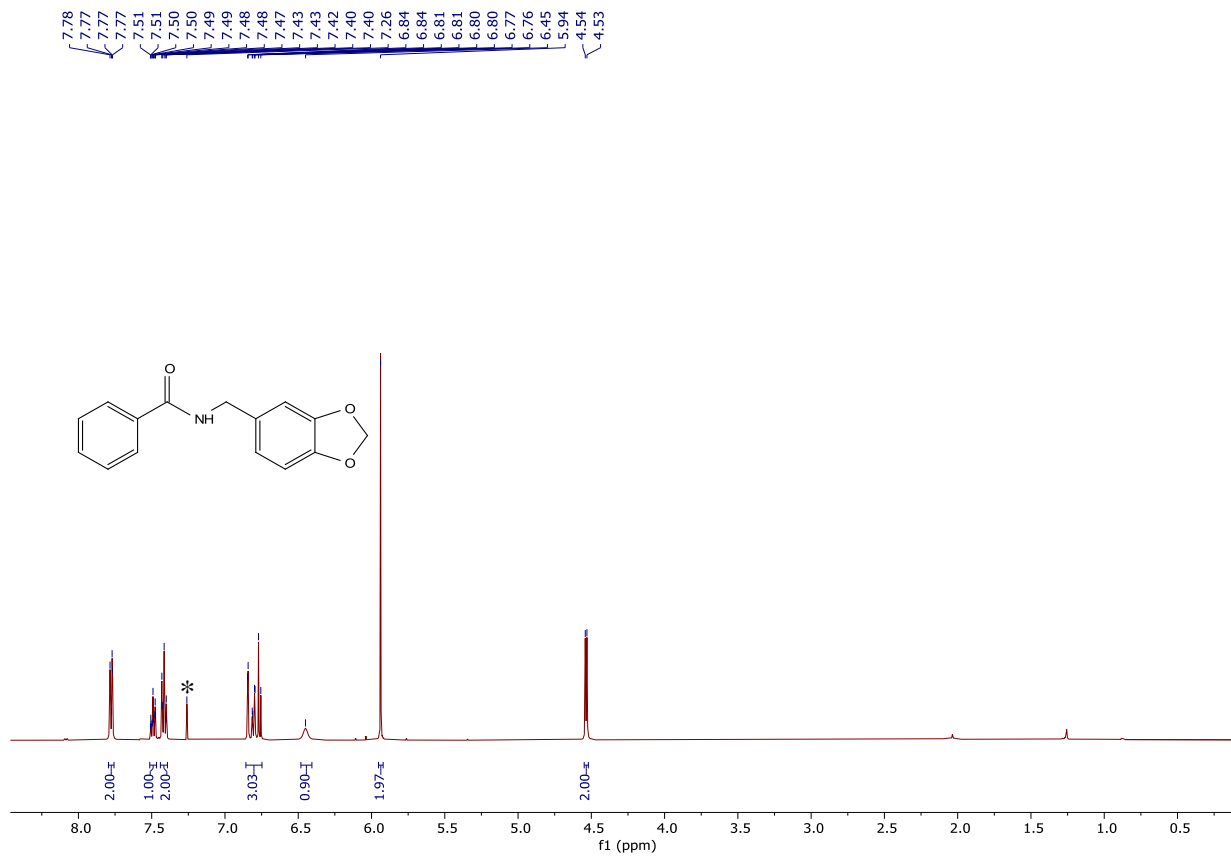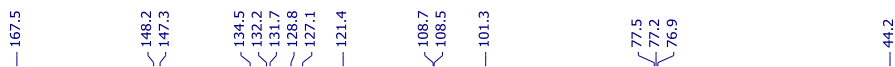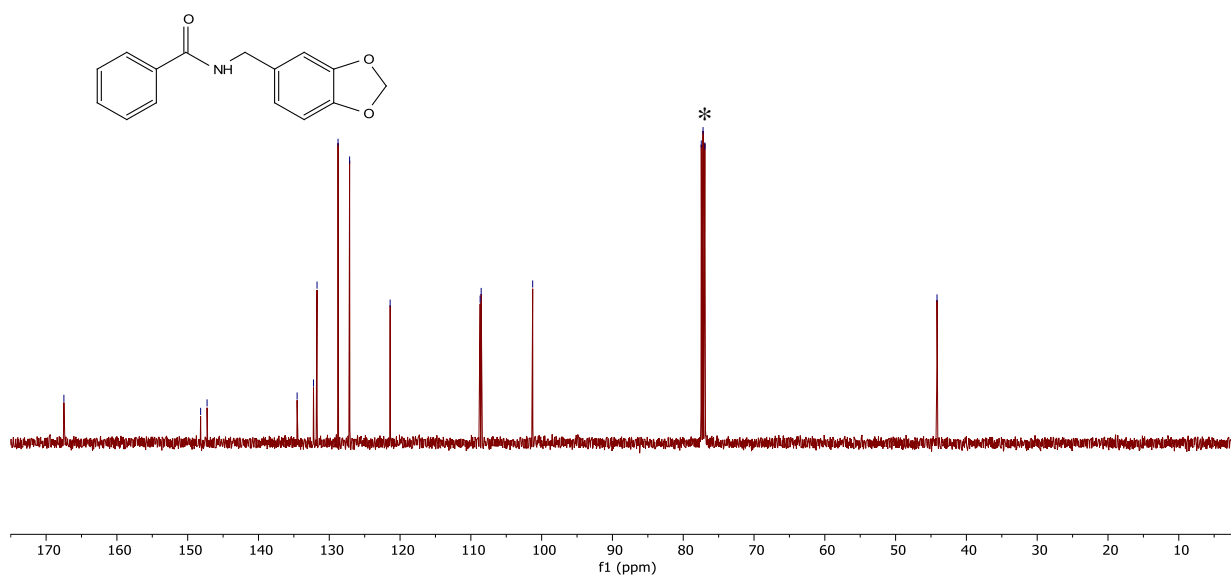

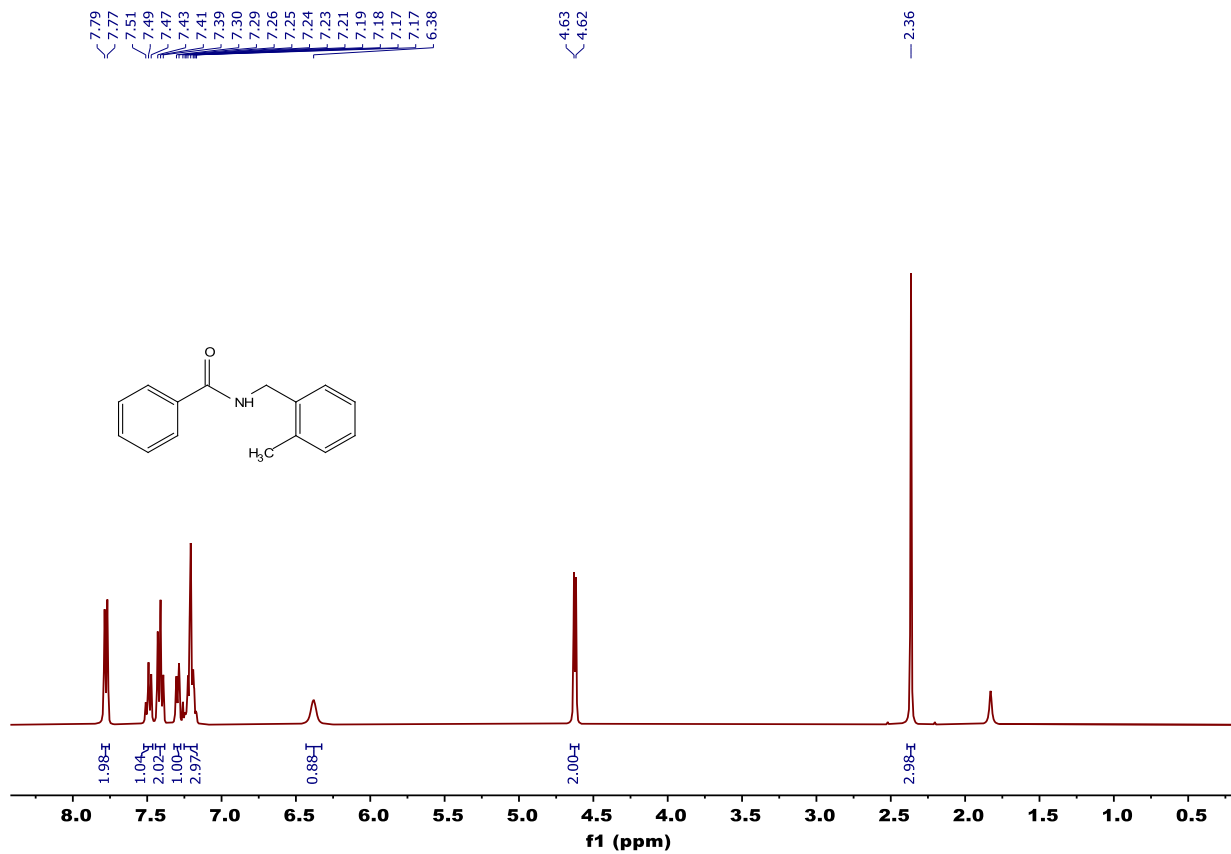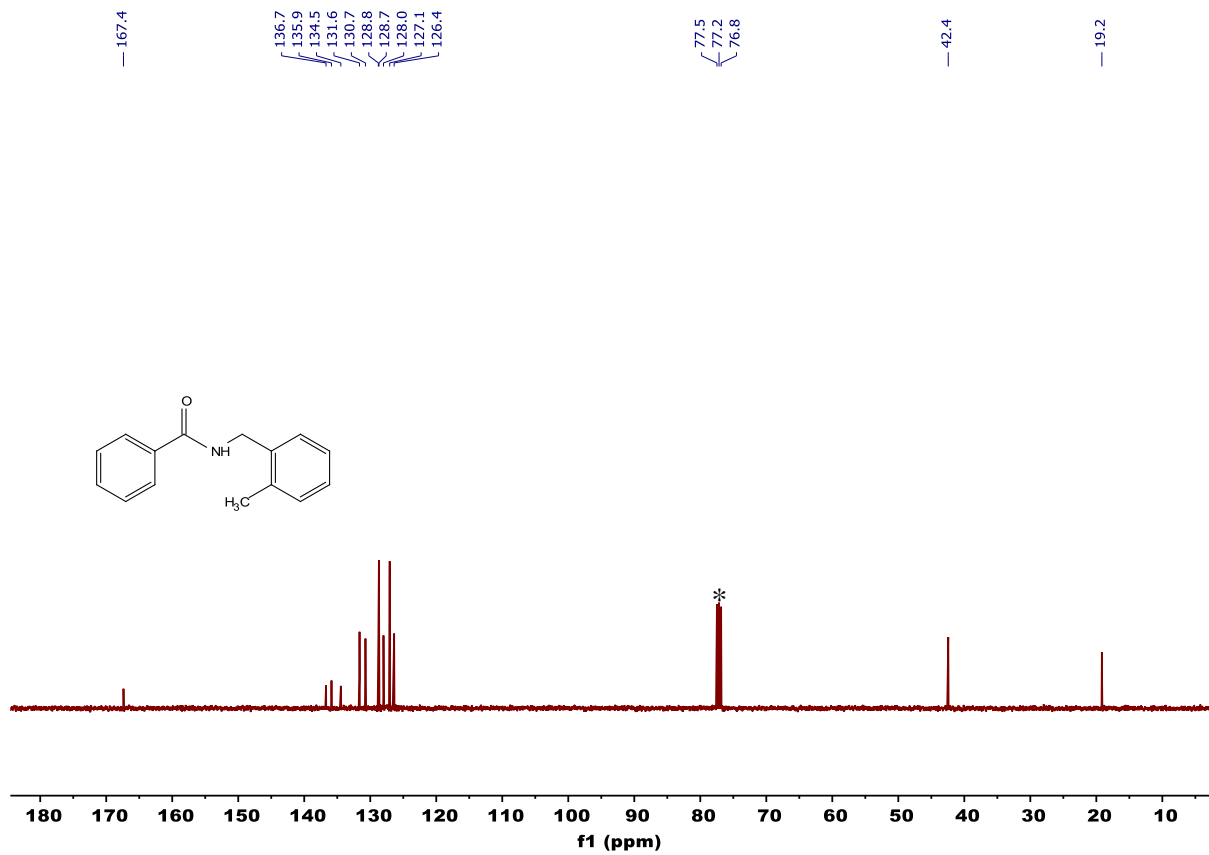



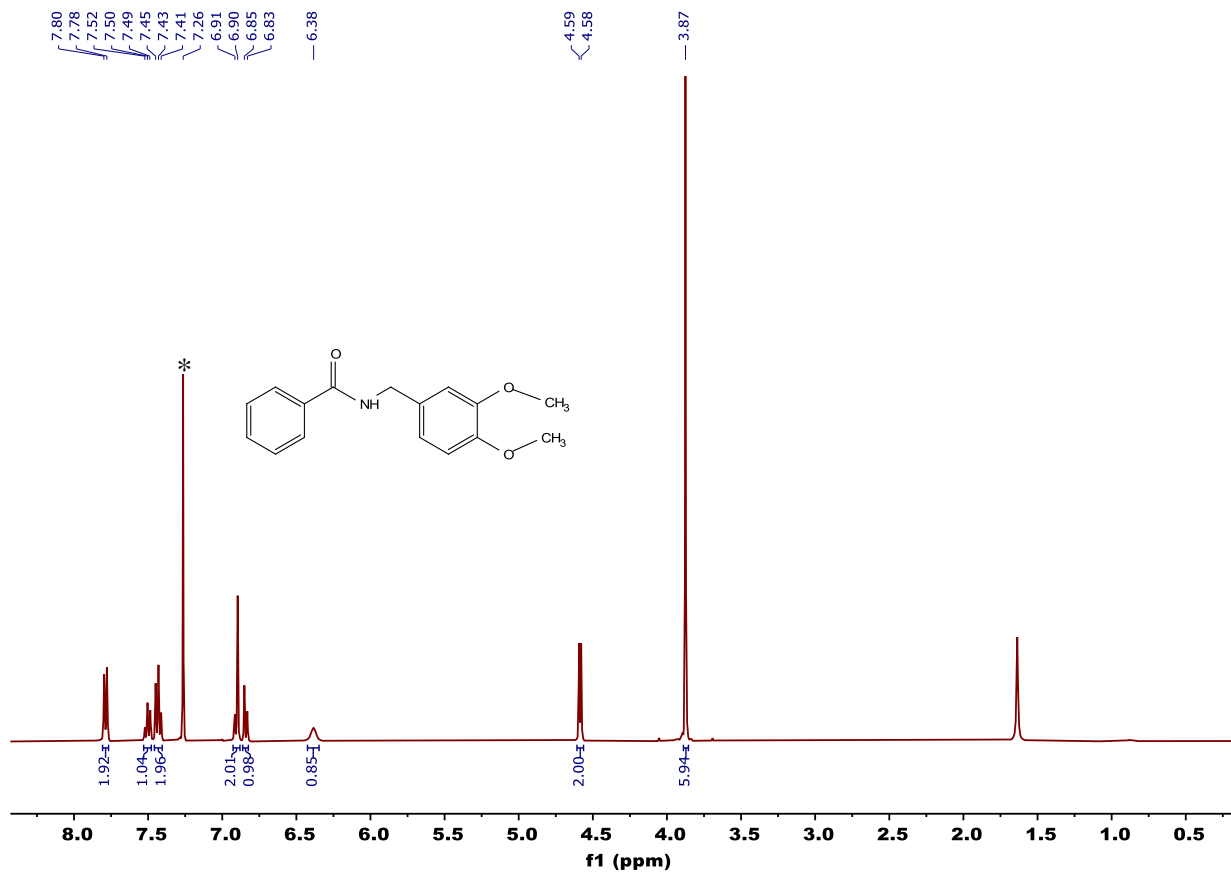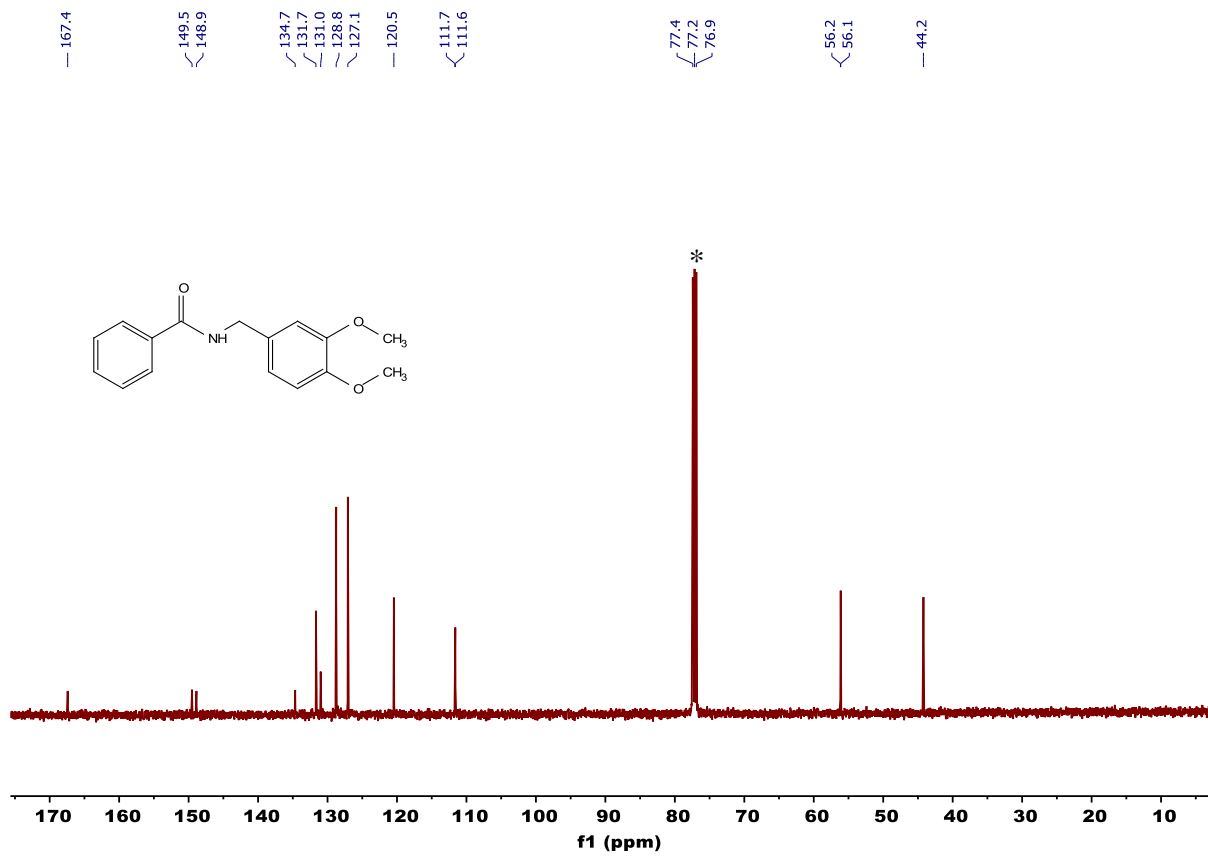

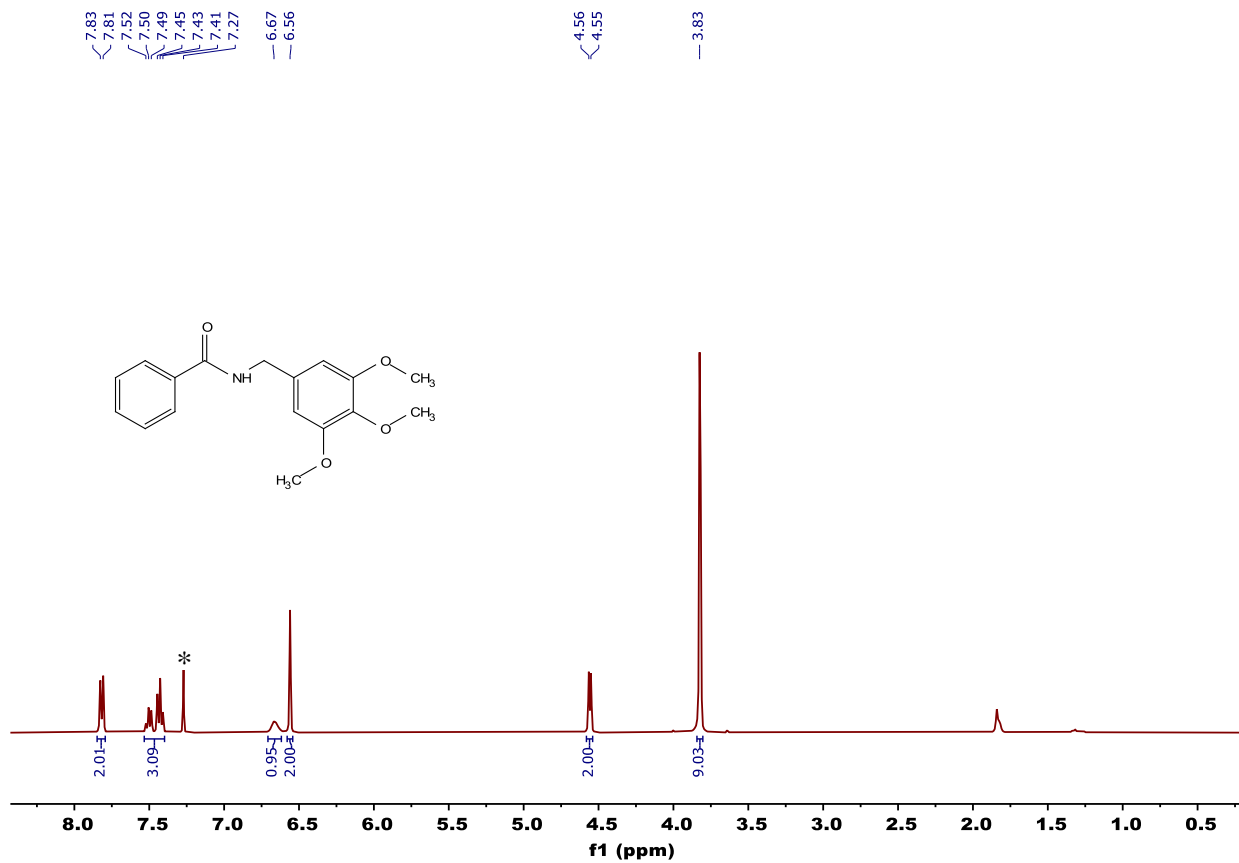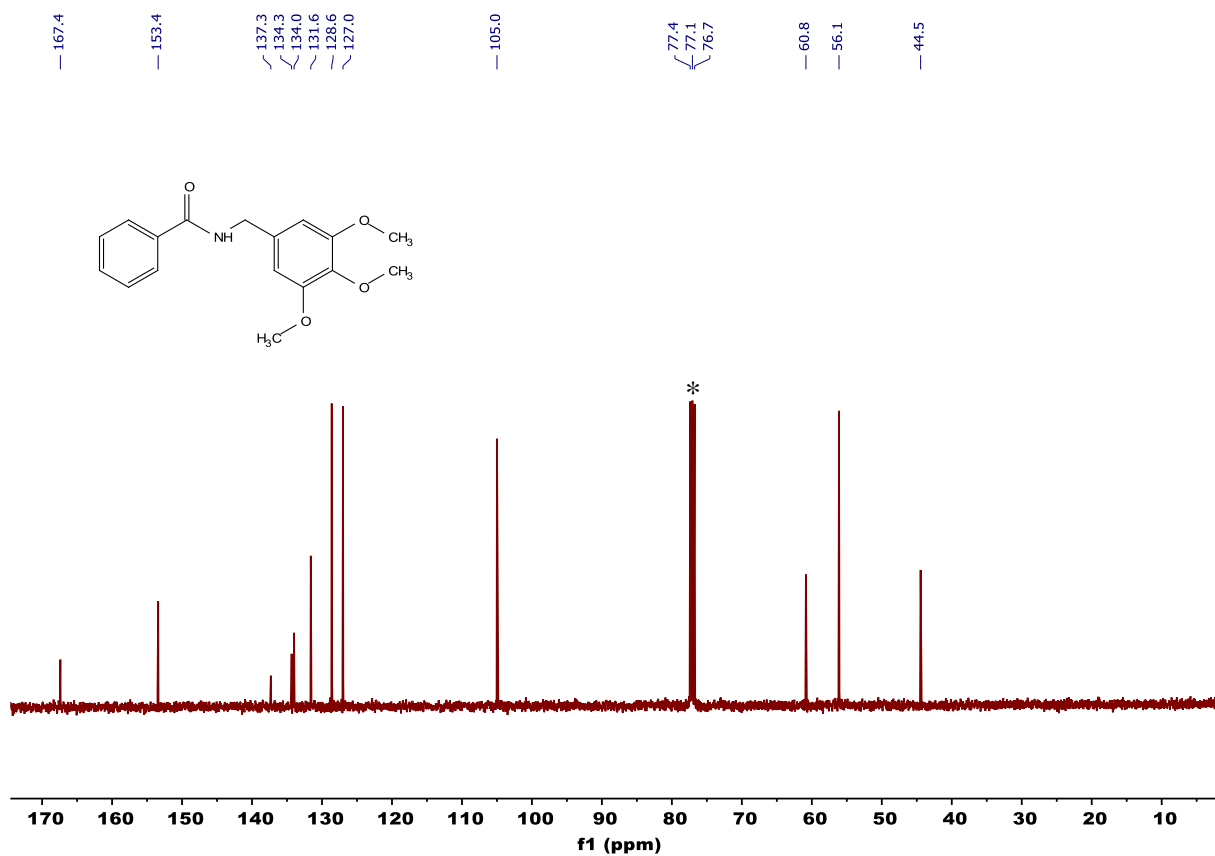

8.09  
7.90  
7.89  
7.88  
7.84  
7.83  
7.76  
7.74  
7.74  
7.58  
7.56  
7.55  
7.53  
7.51  
7.50  
7.48  
7.47  
7.45  
7.44  
7.42  
7.39  
7.38  
7.36  
7.26  
6.46  
5.08  
5.07

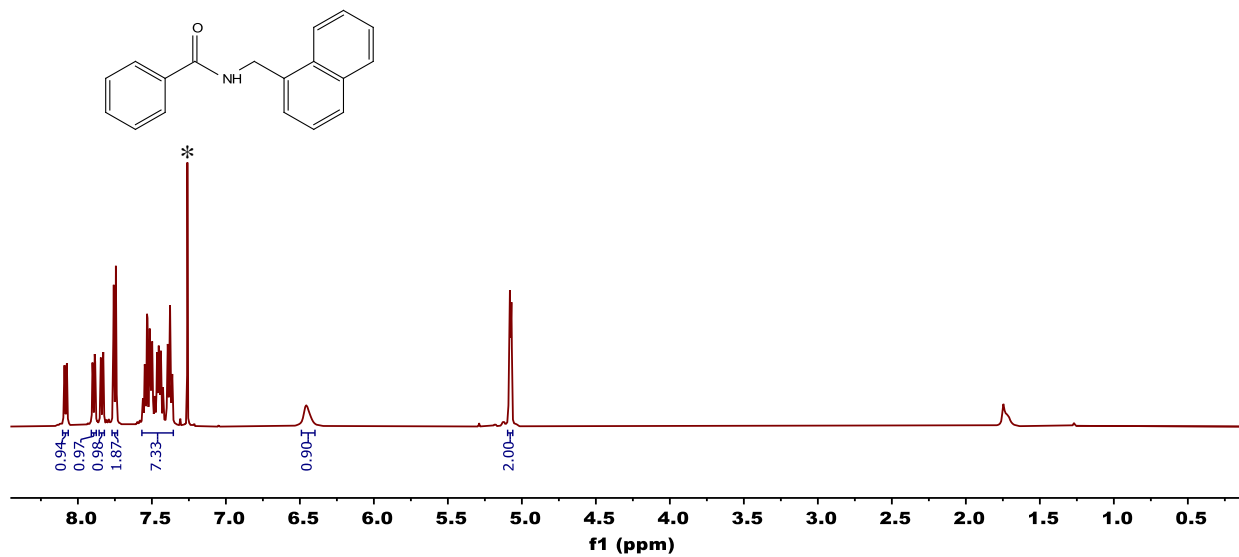

167.3  
134.5  
133.5  
131.6  
128.9  
128.7  
127.1  
127.0  
126.9  
126.2  
125.6  
123.6  
77.4  
77.2  
76.9  
42.5

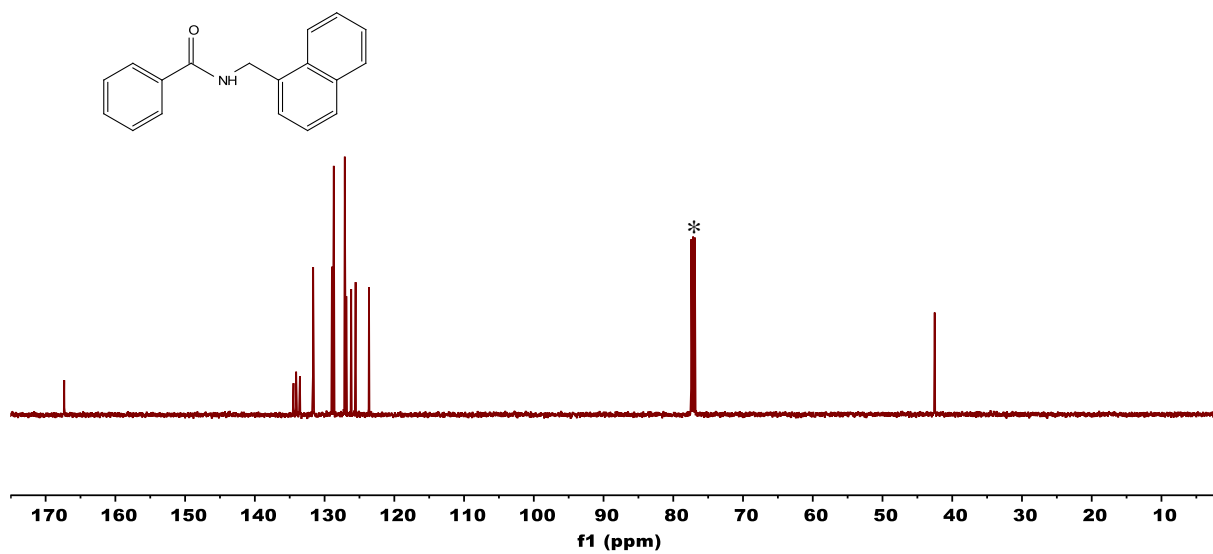

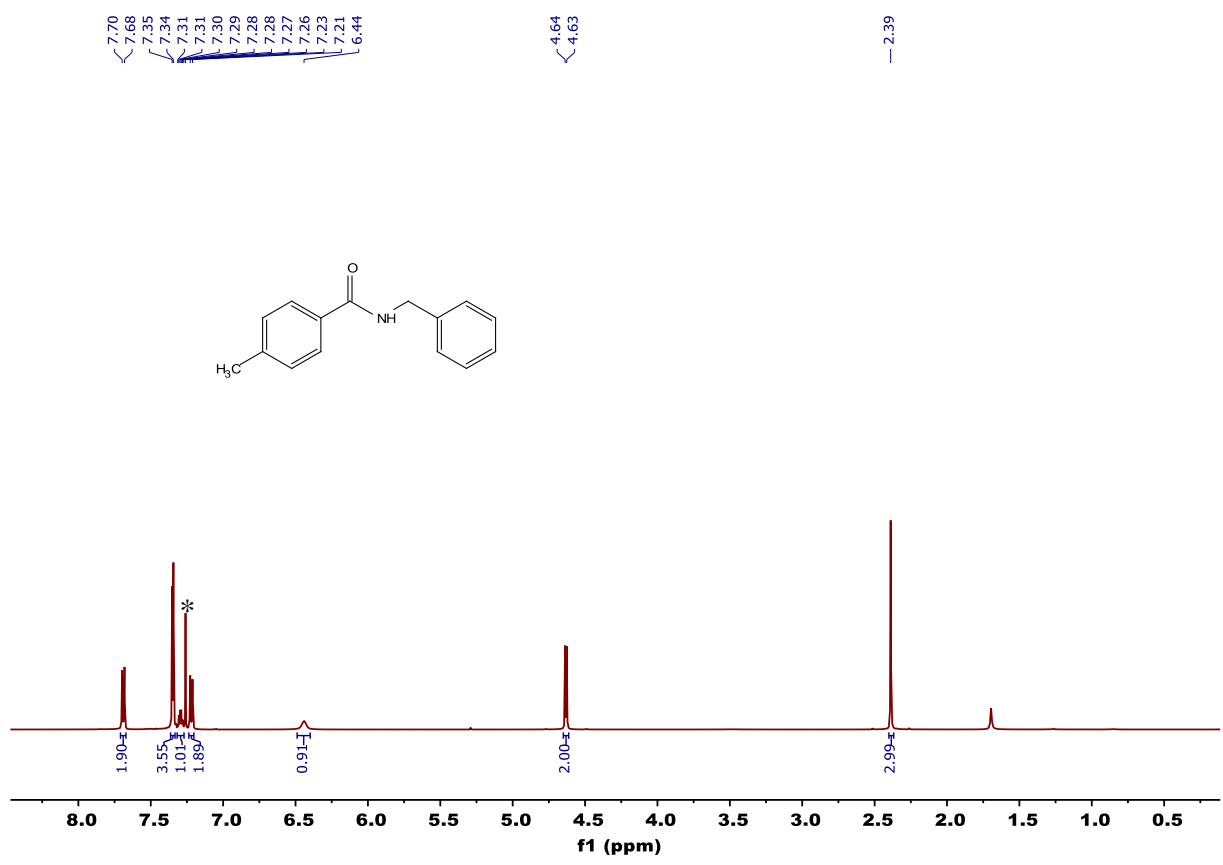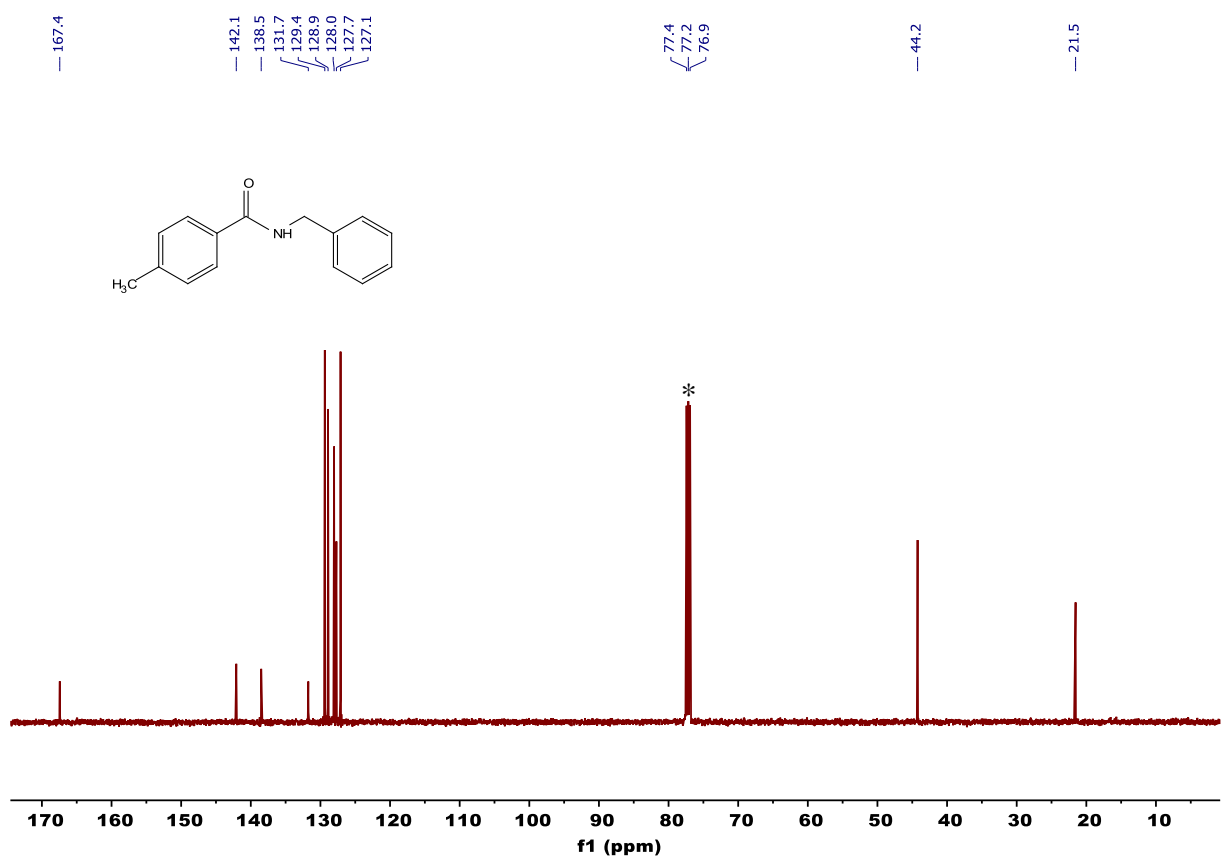

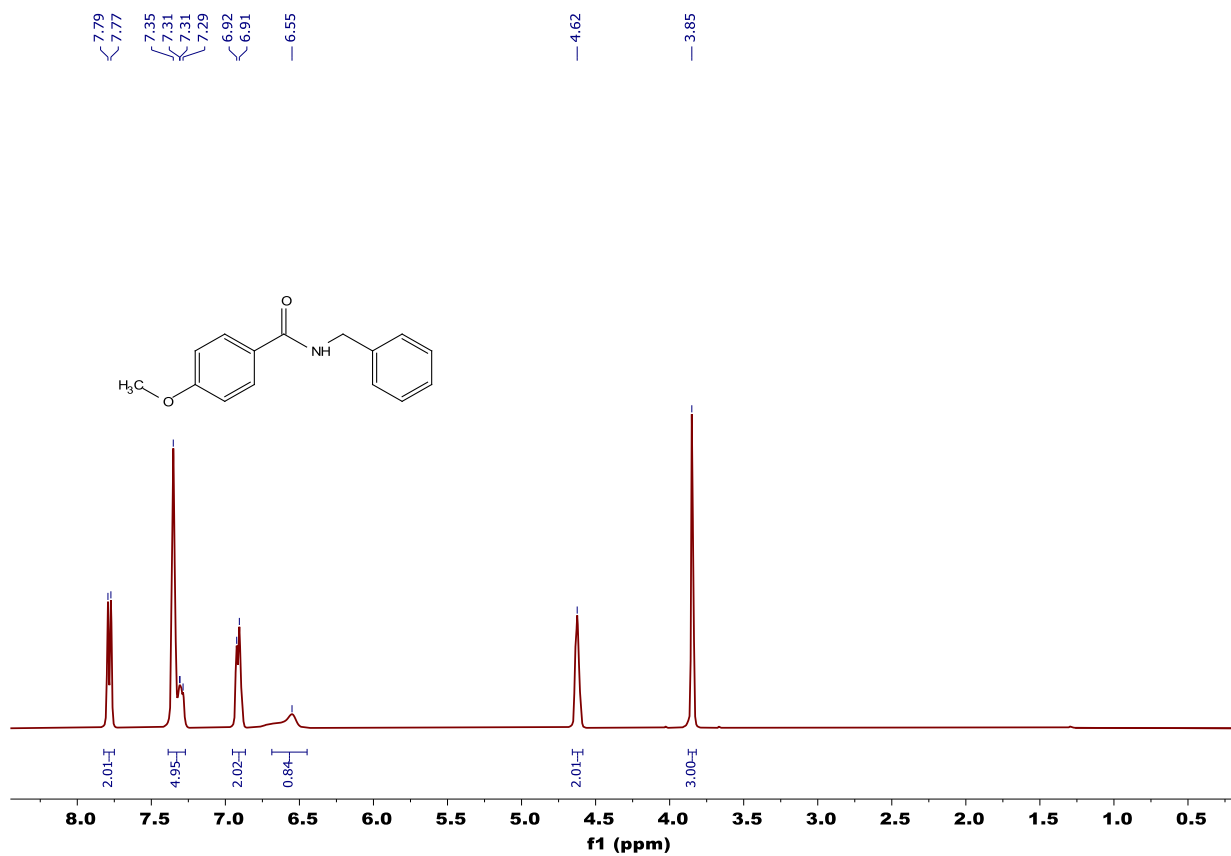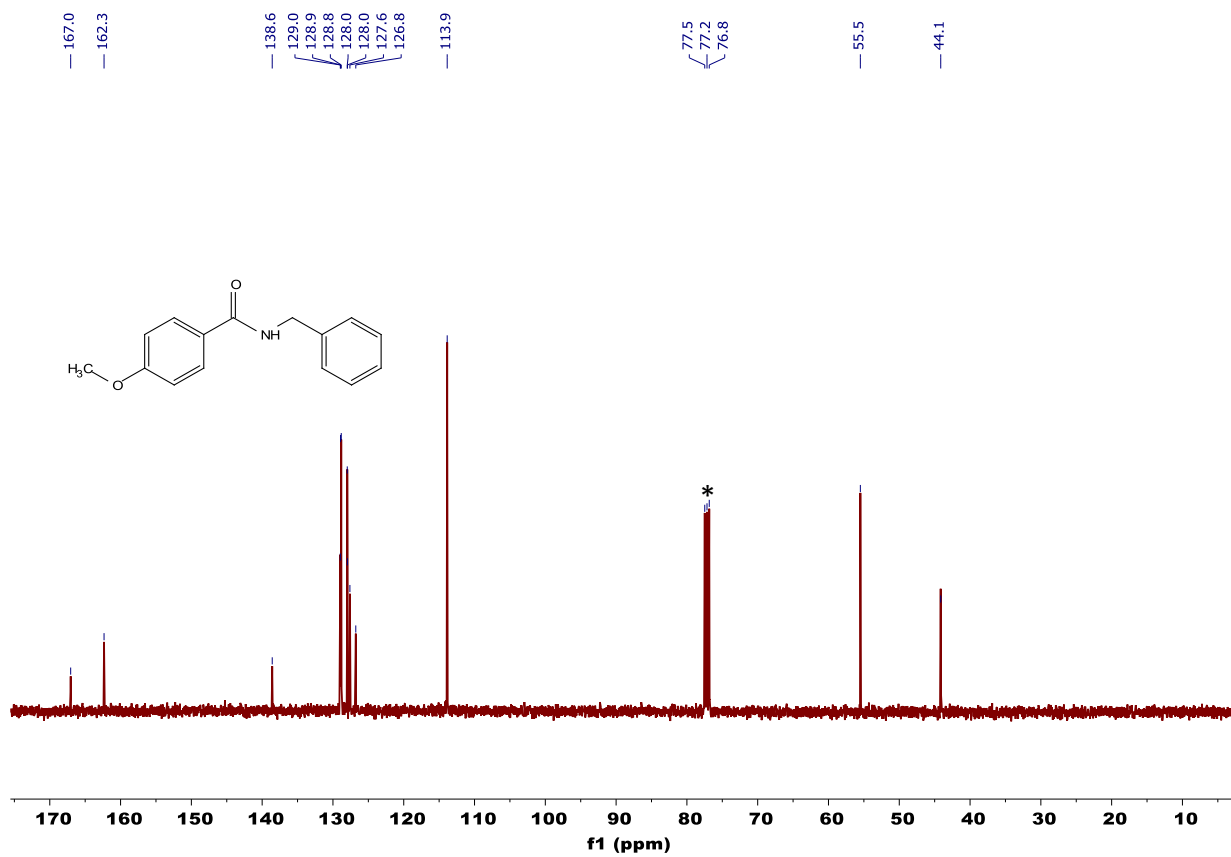

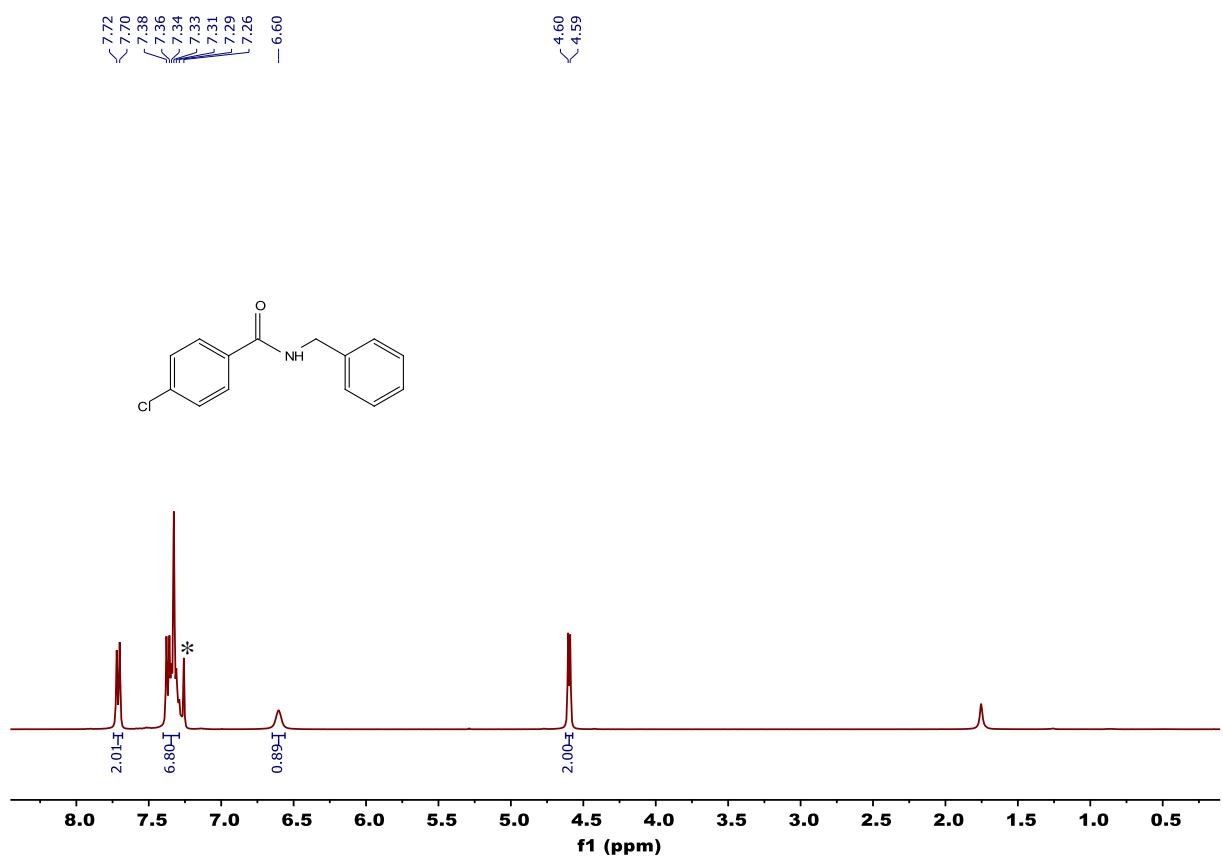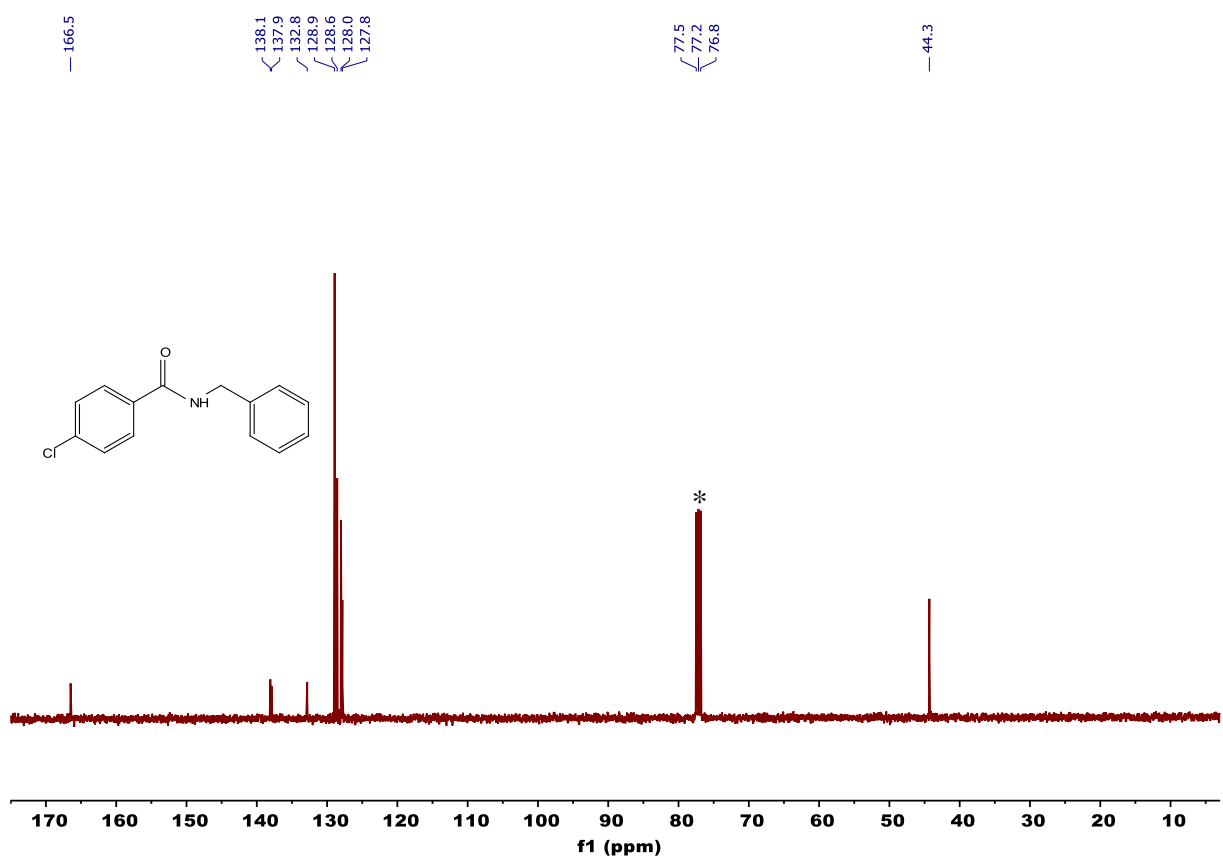

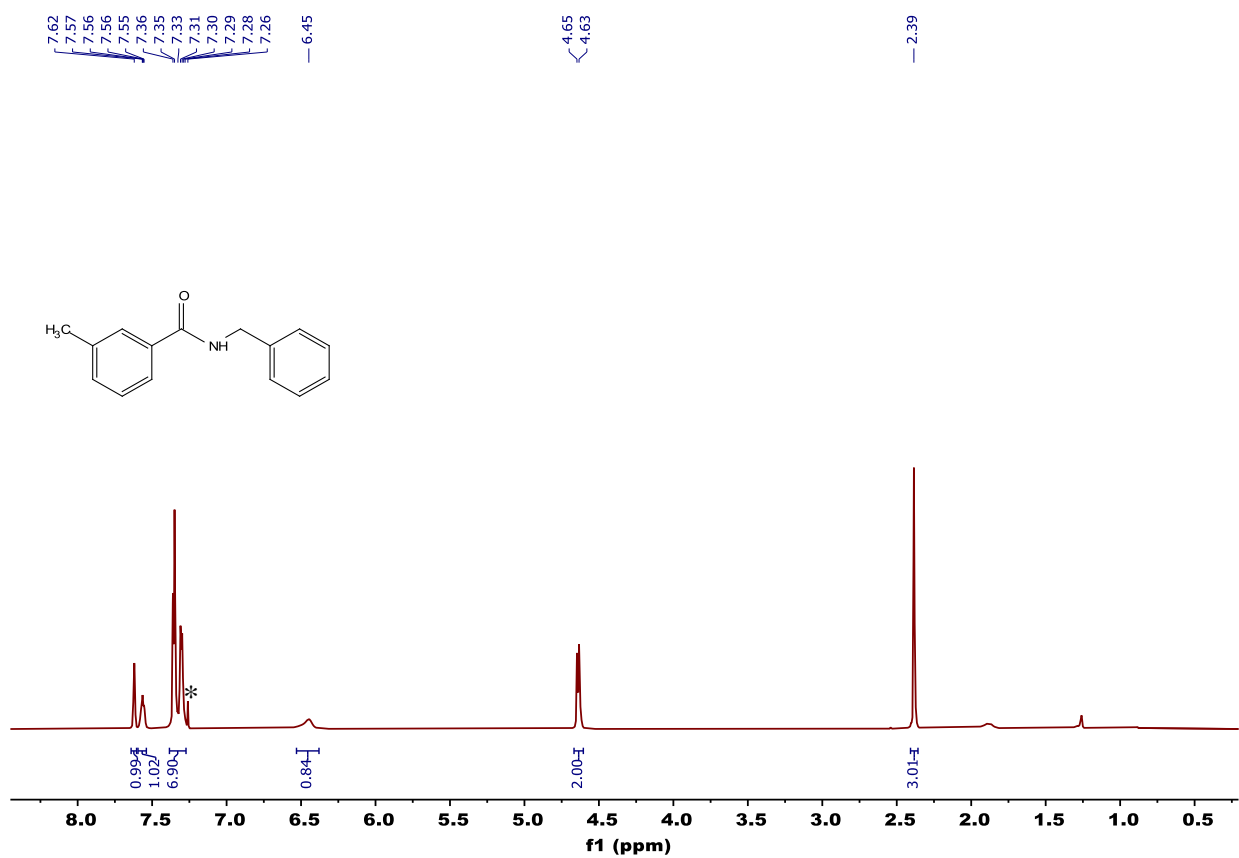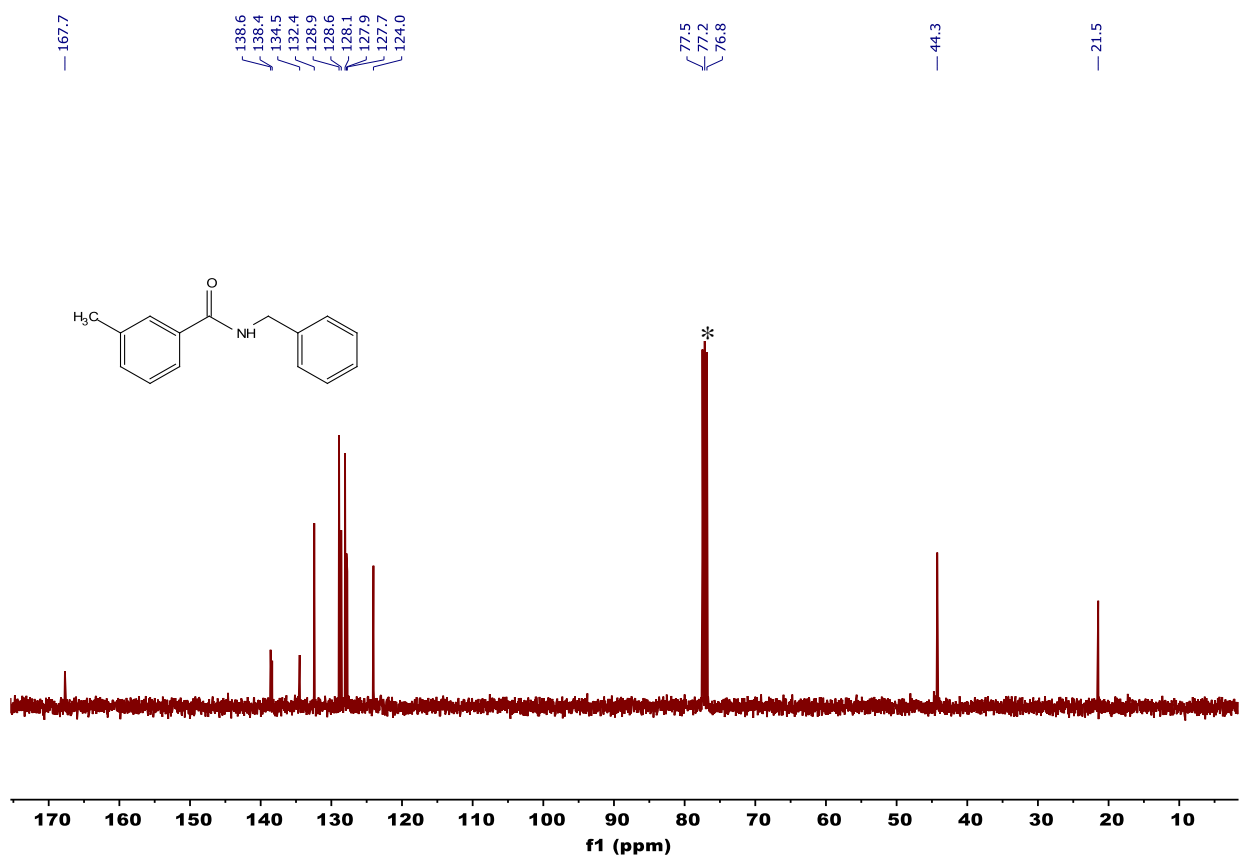

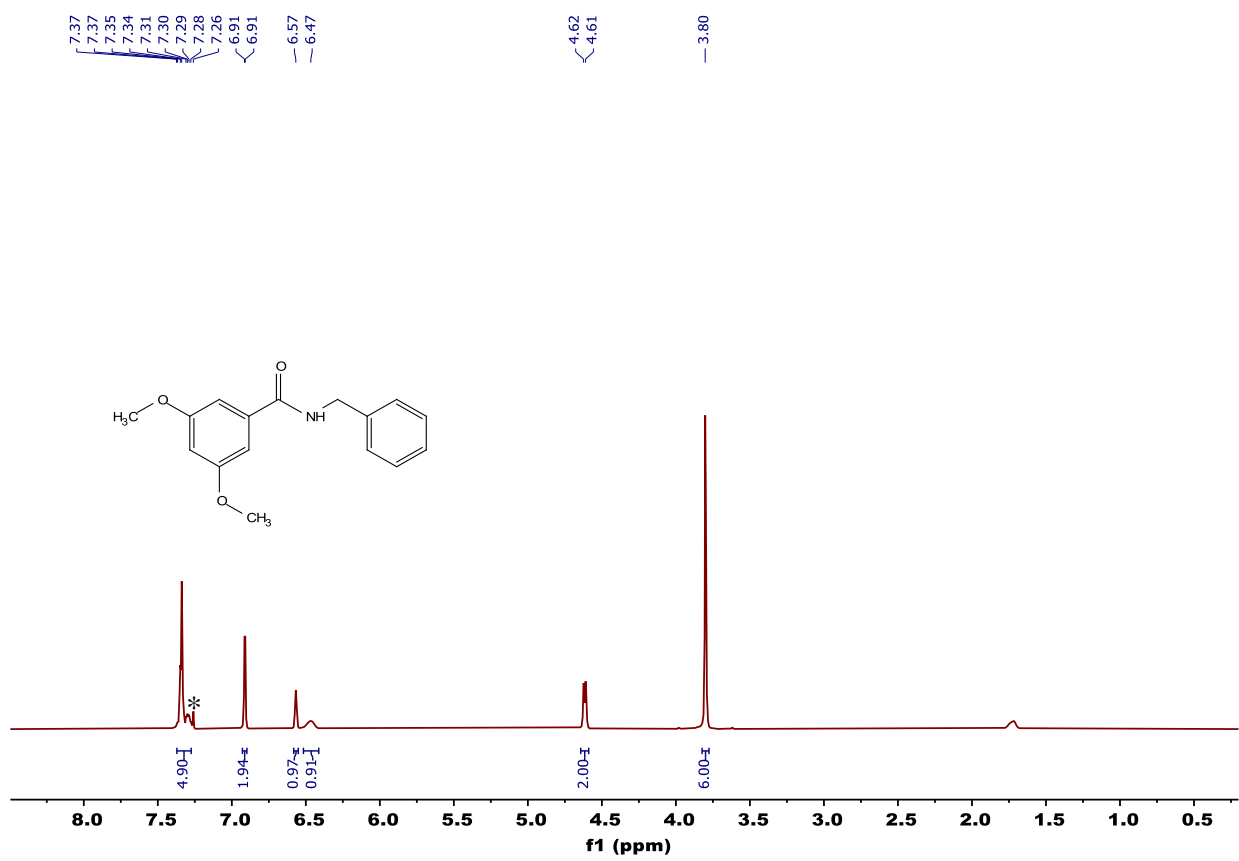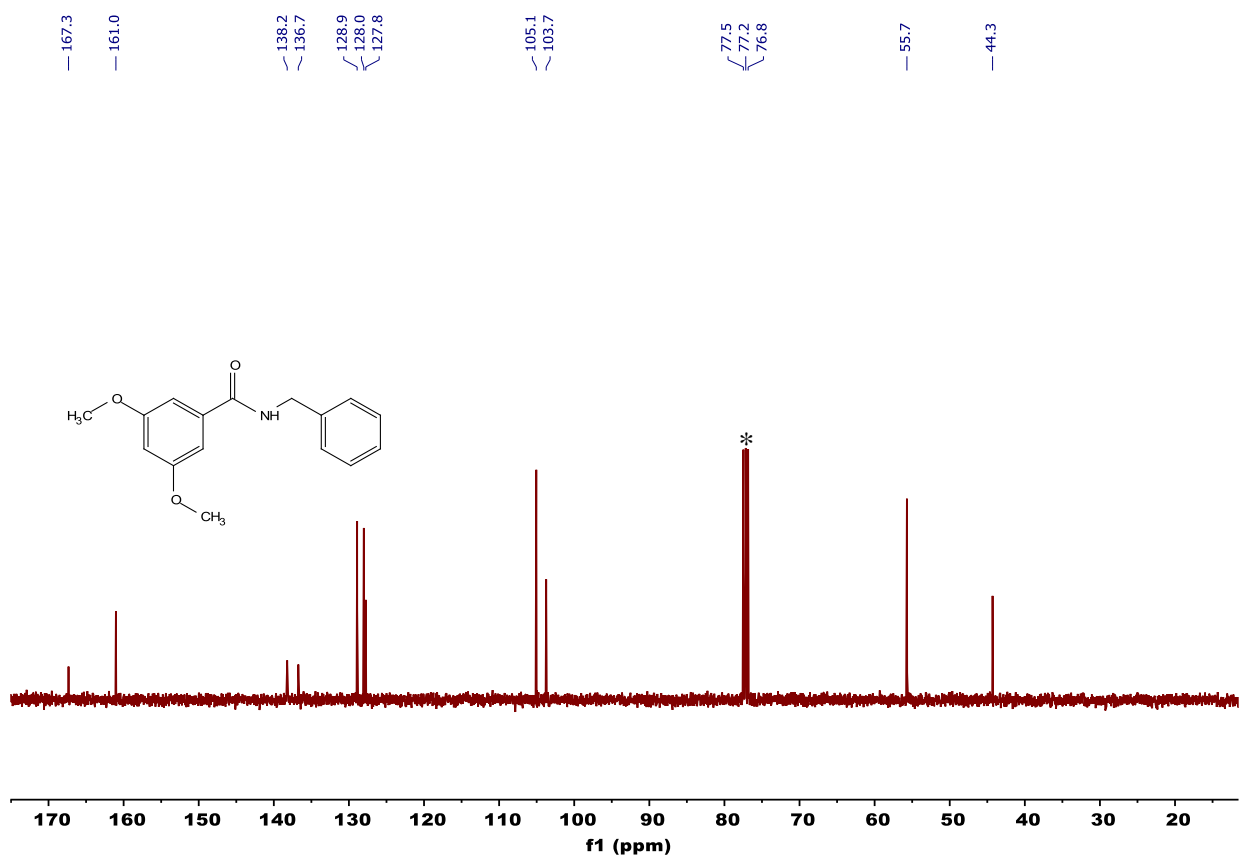



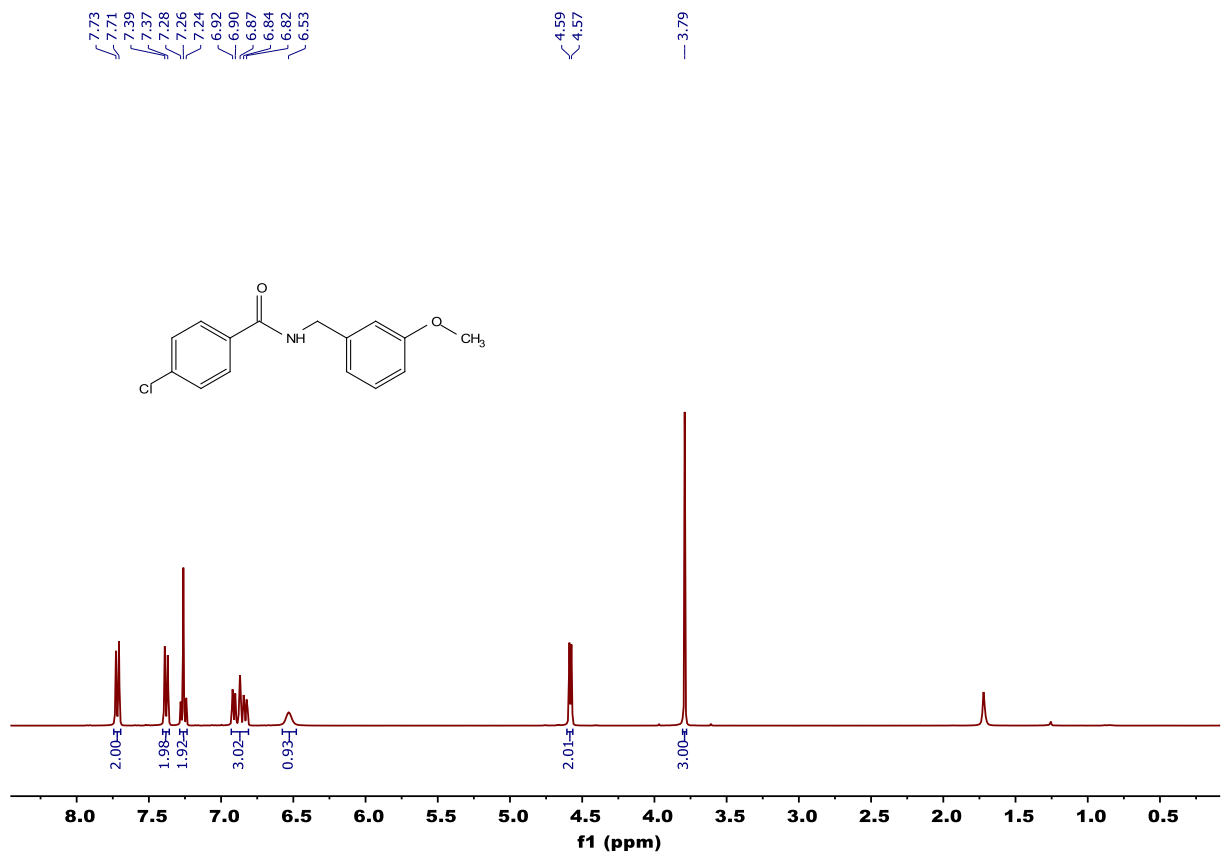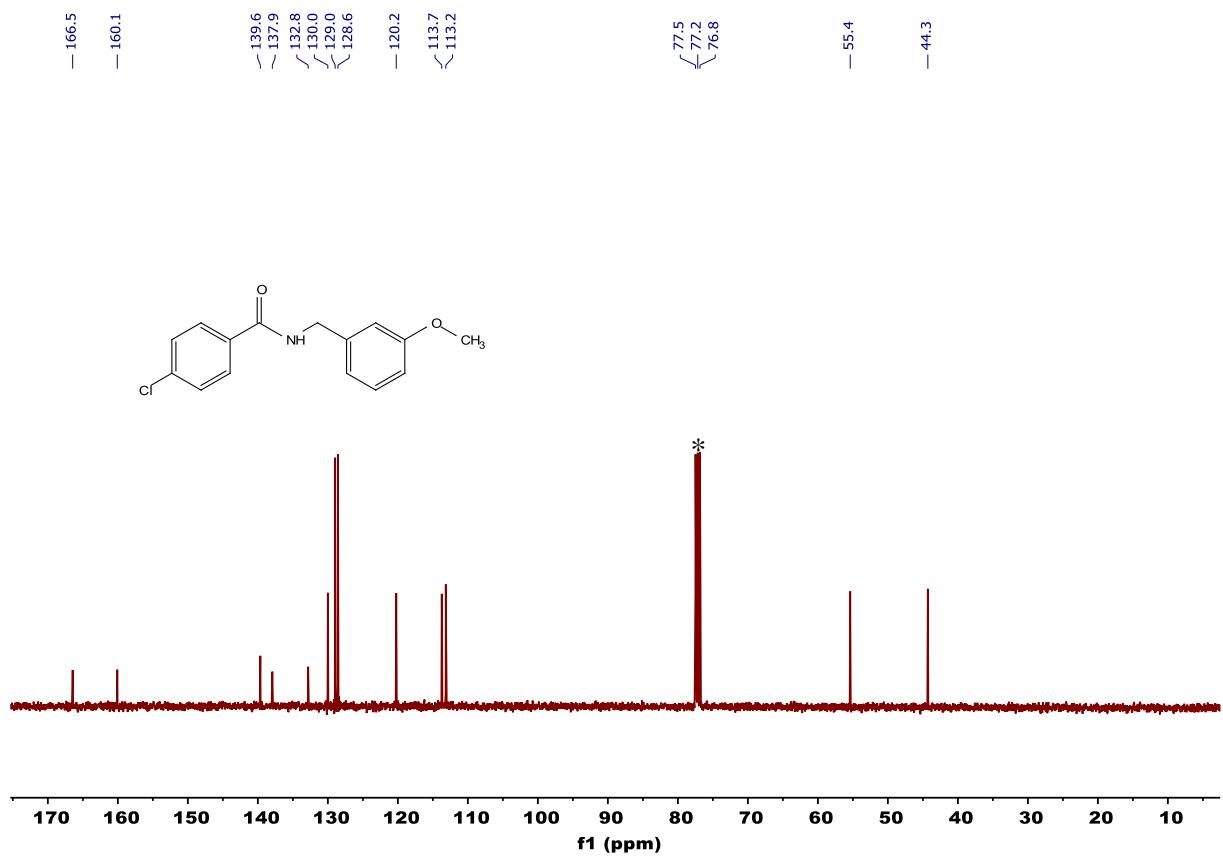

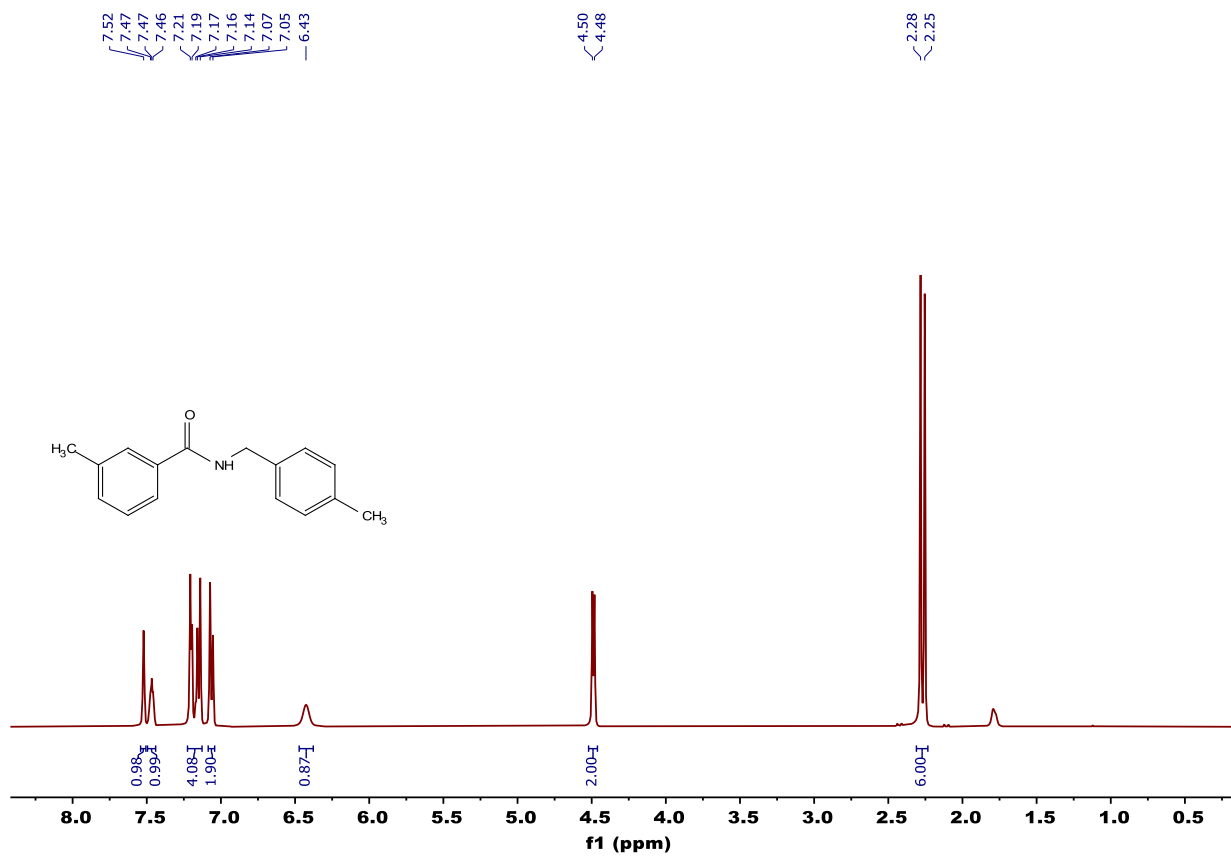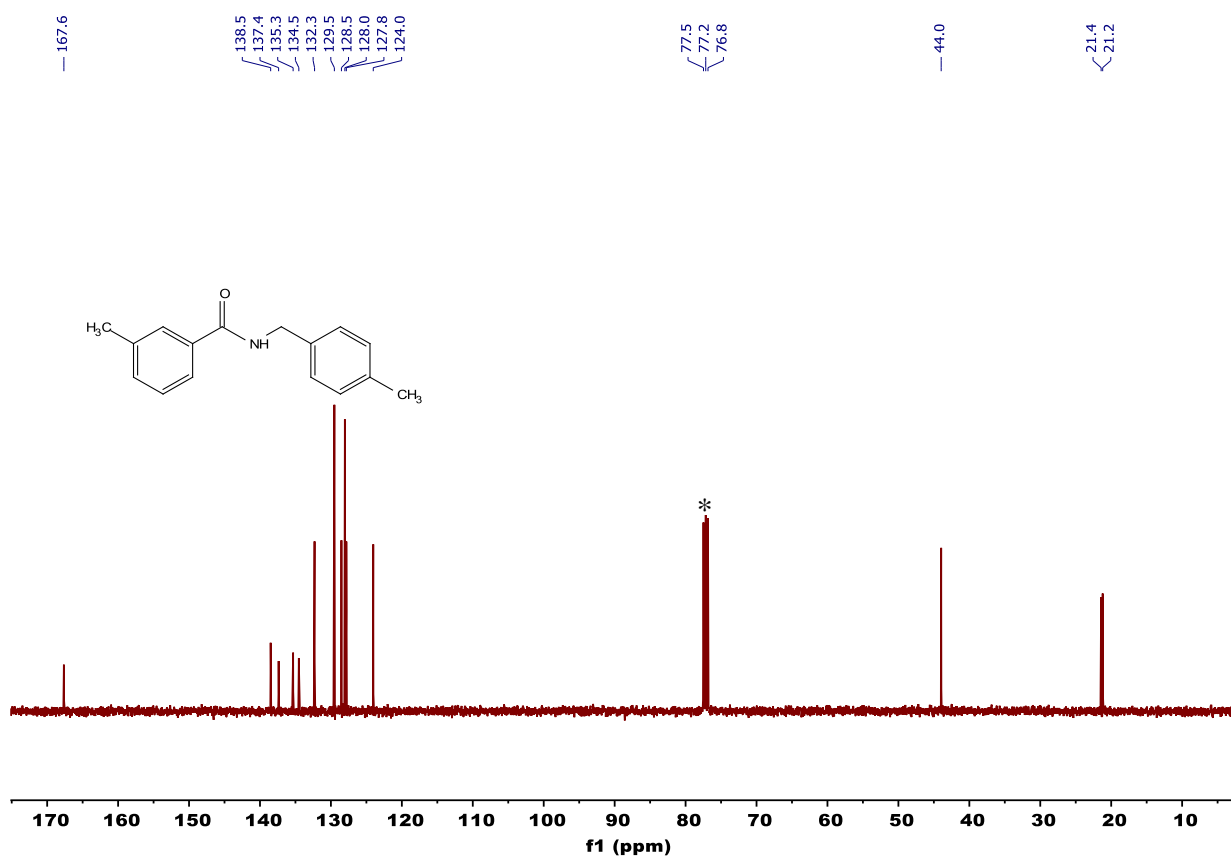

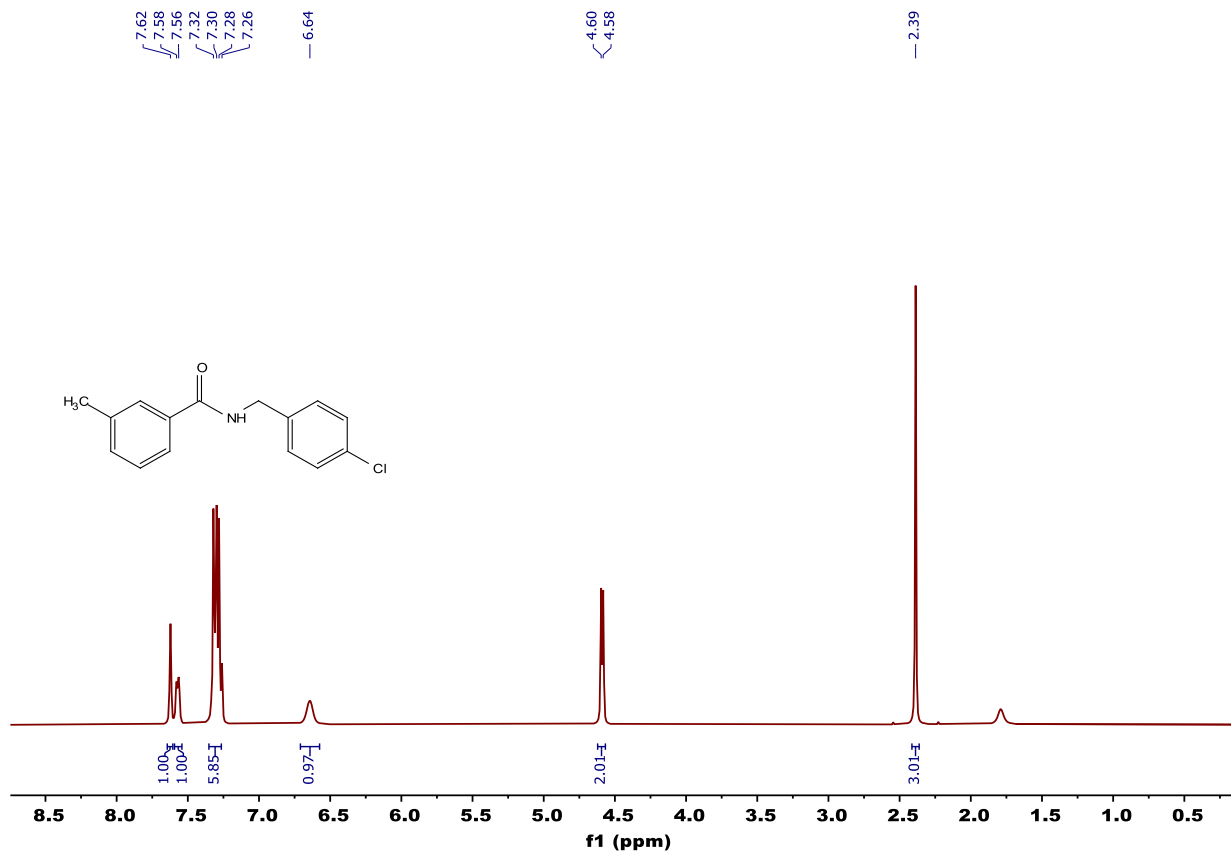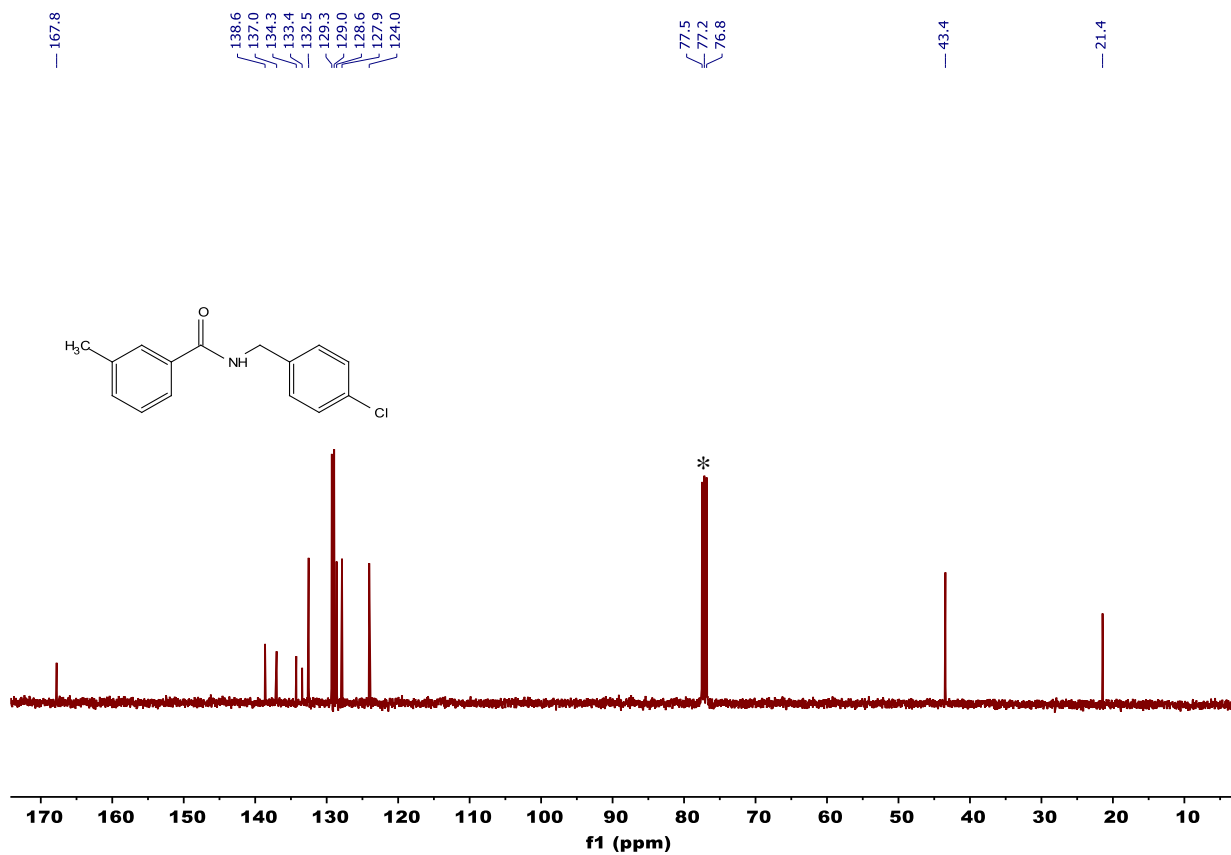

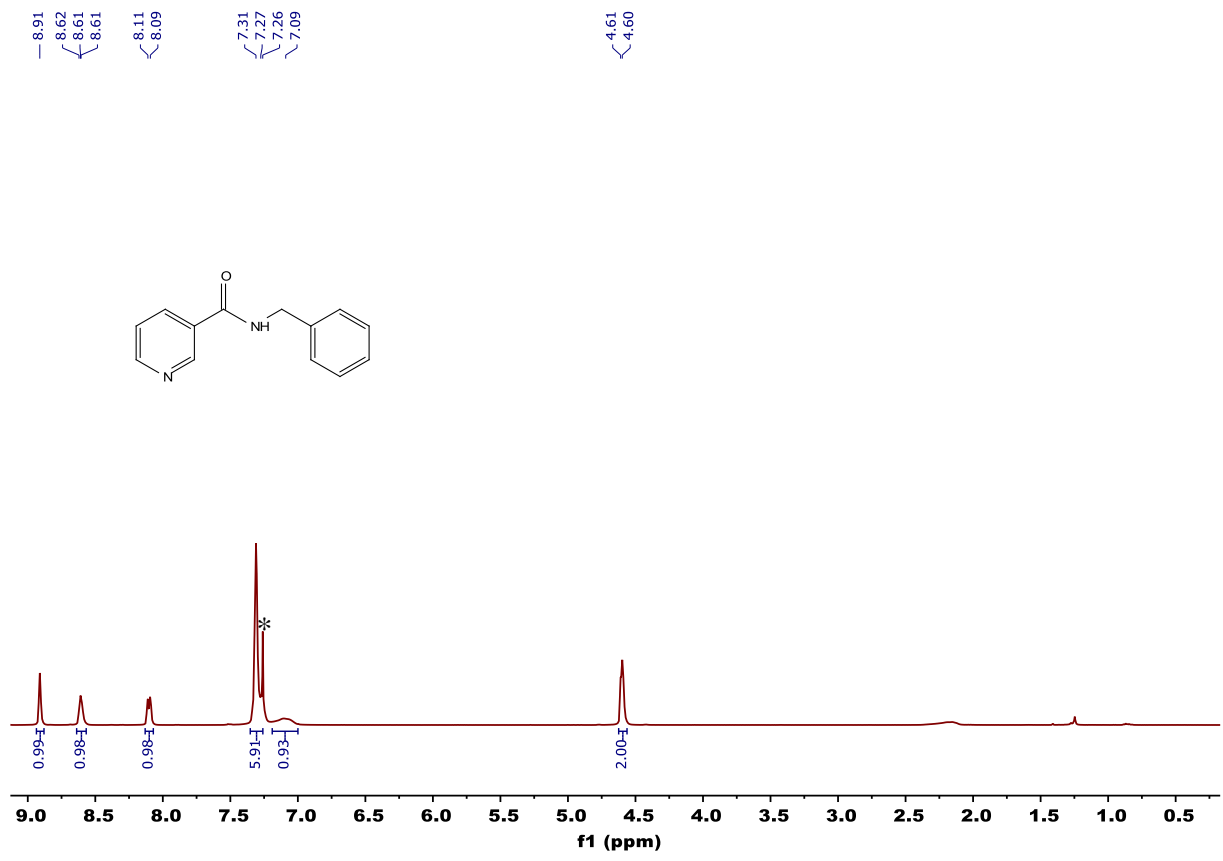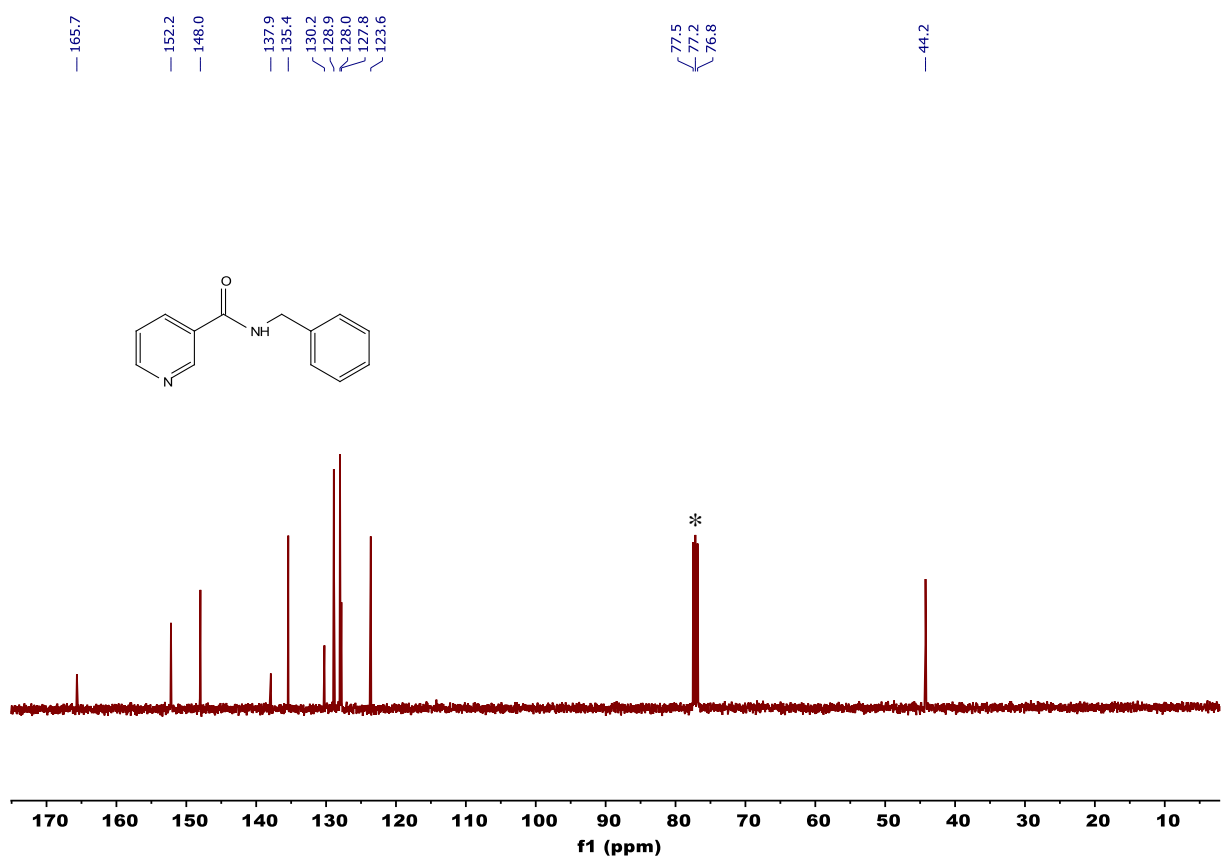

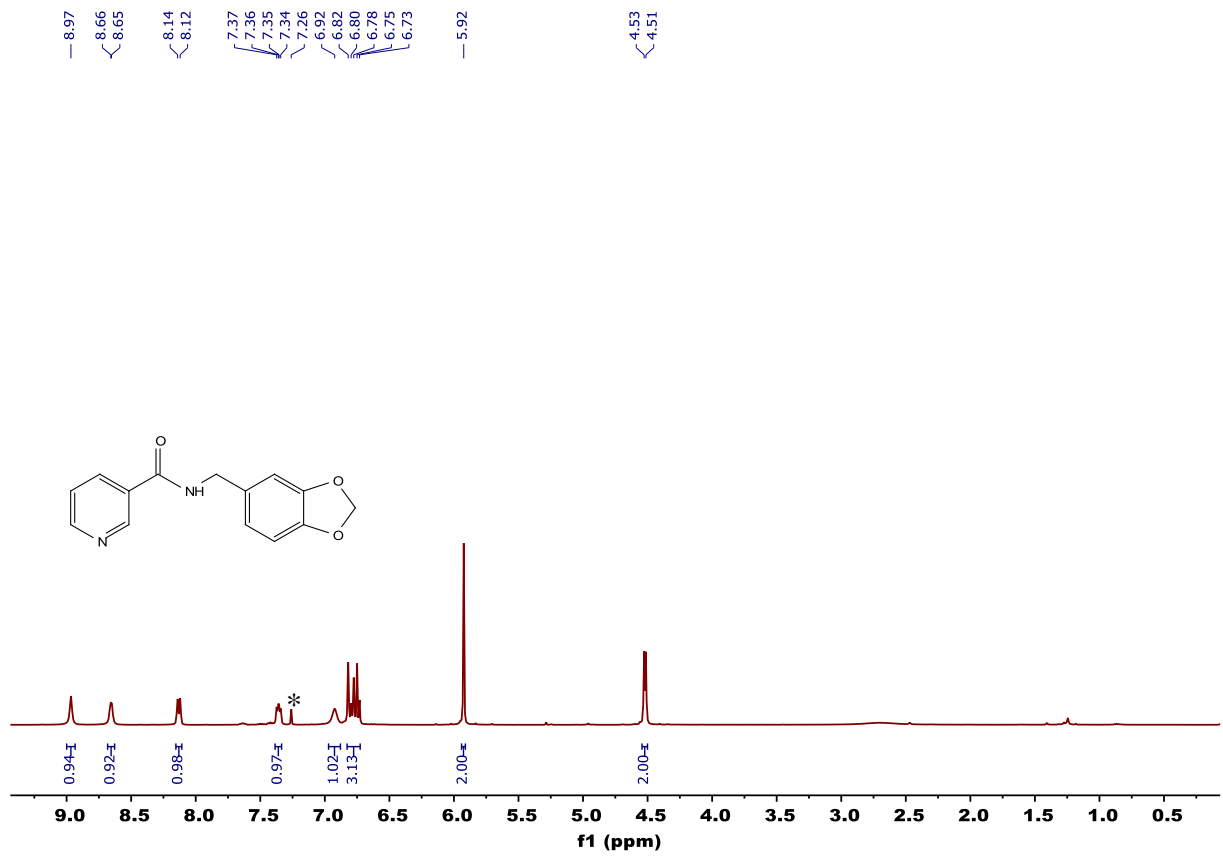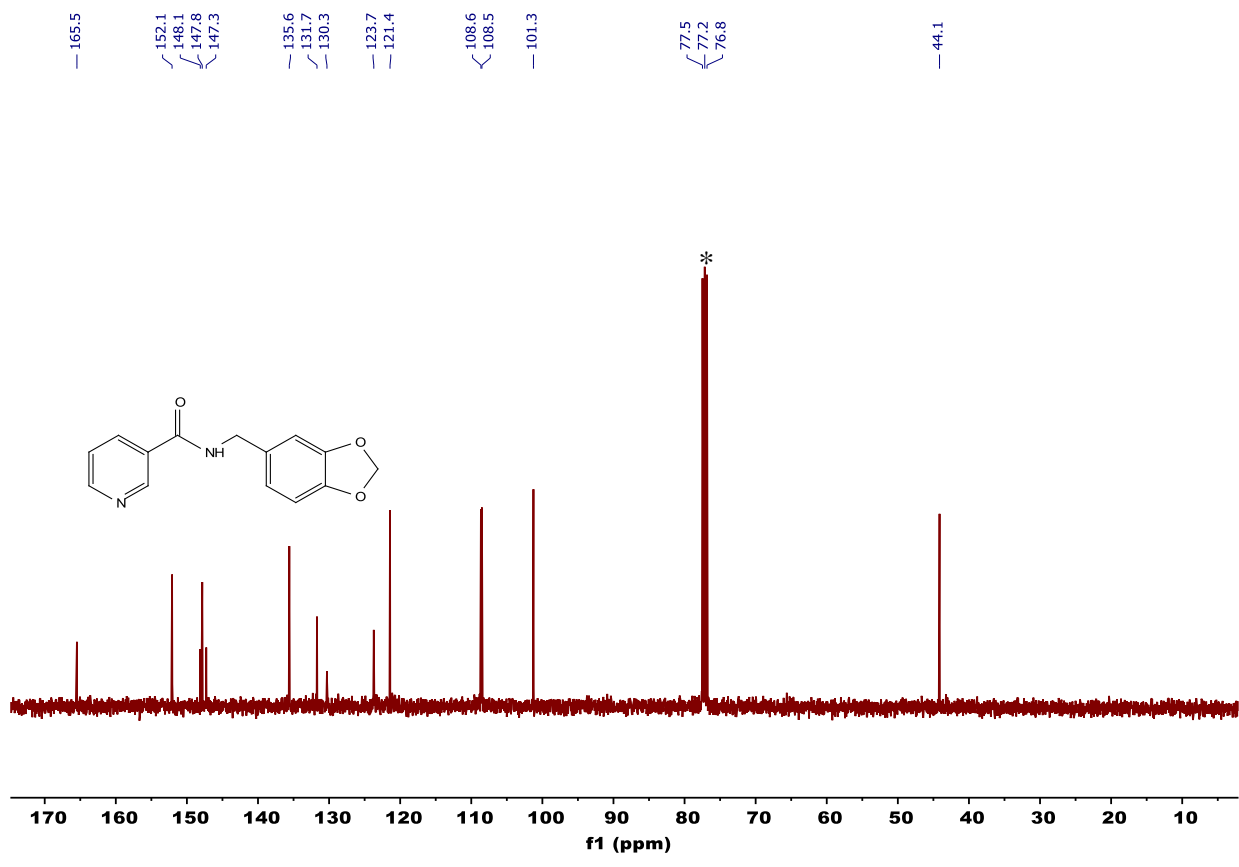

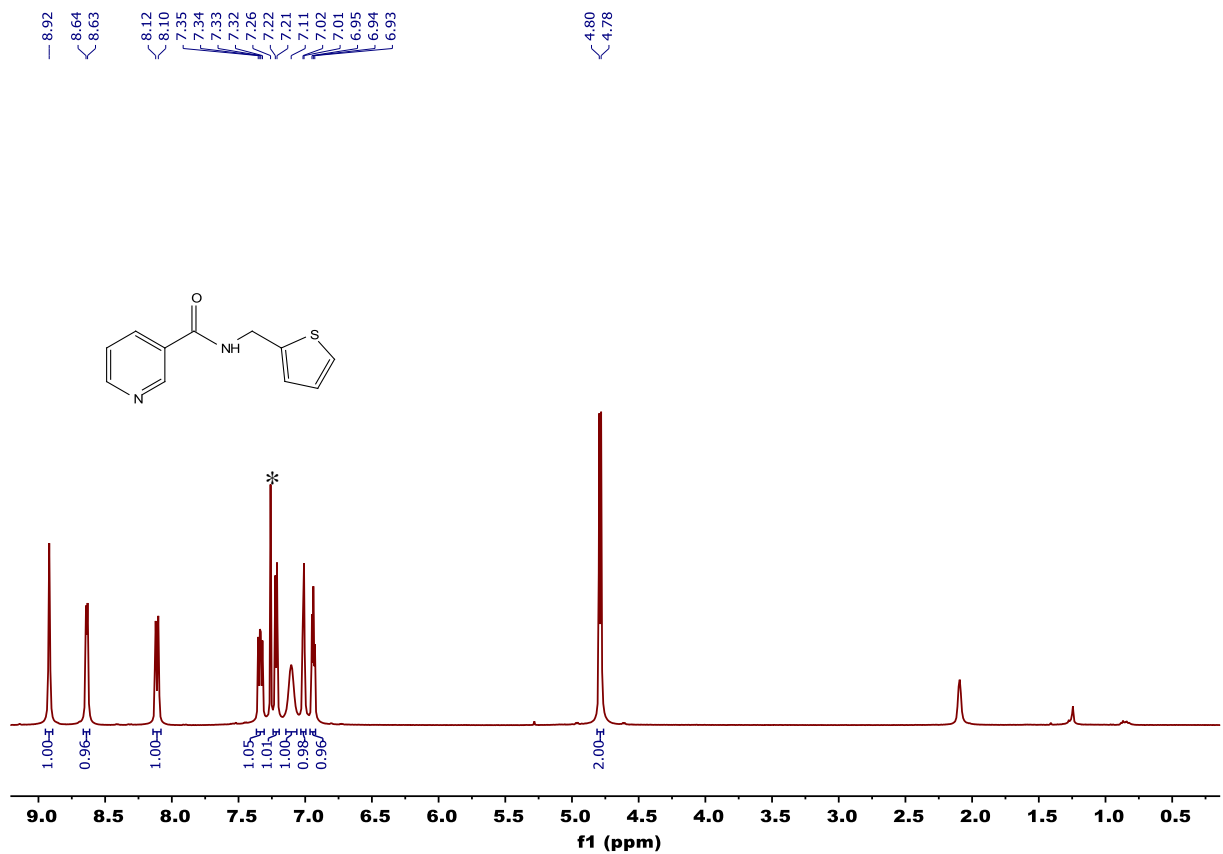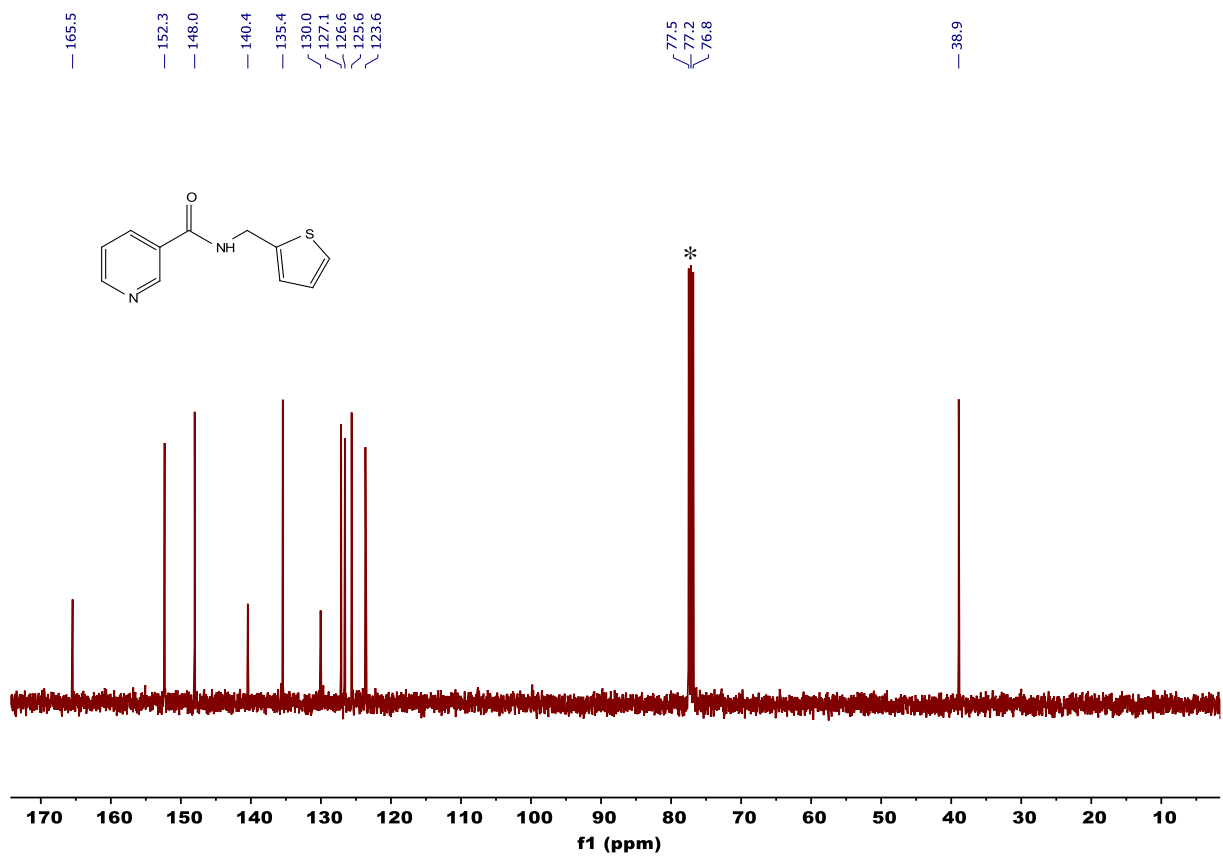

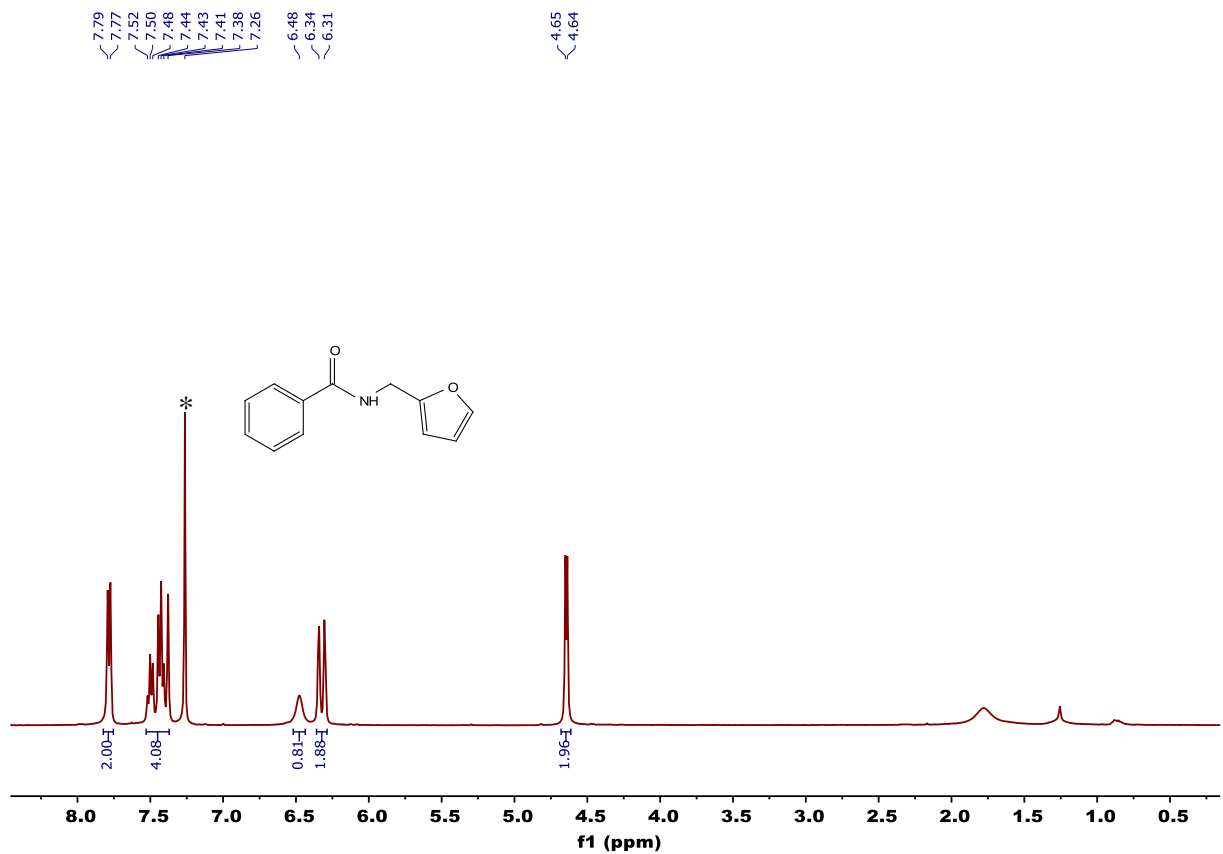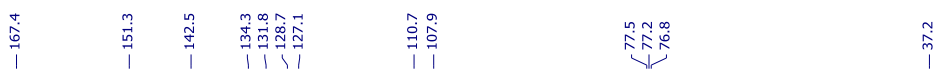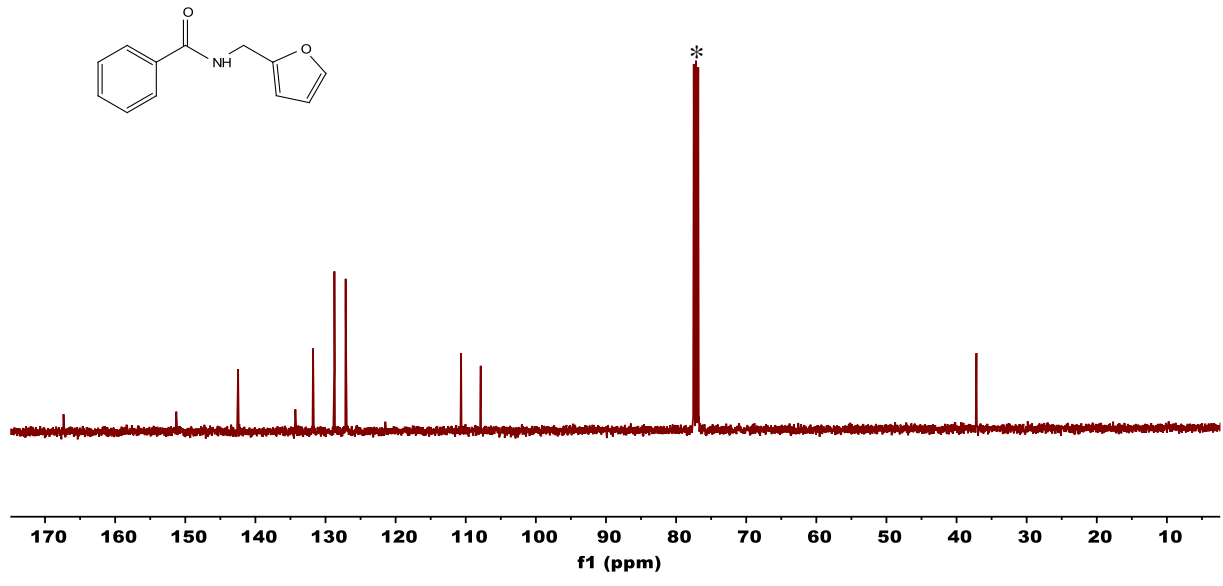

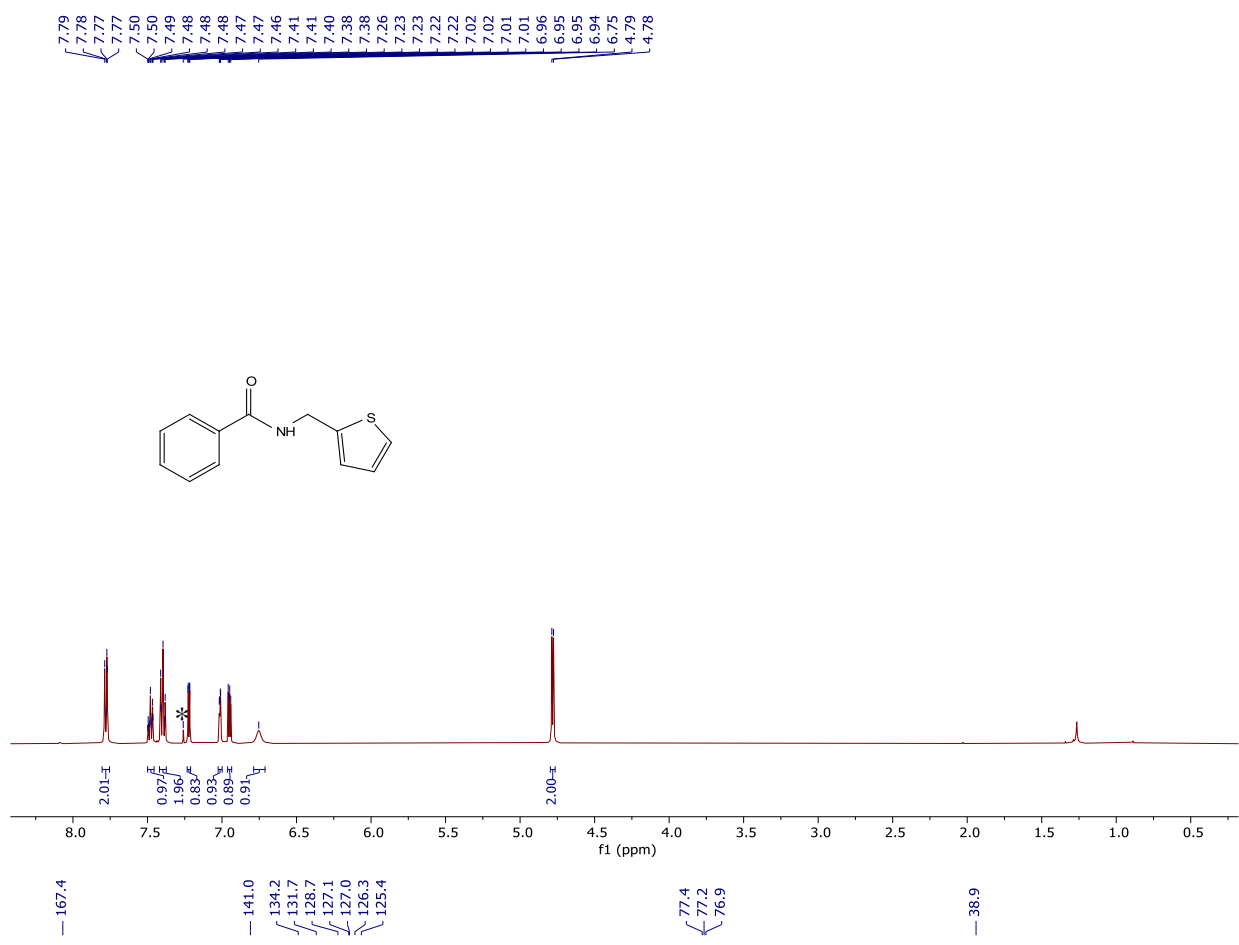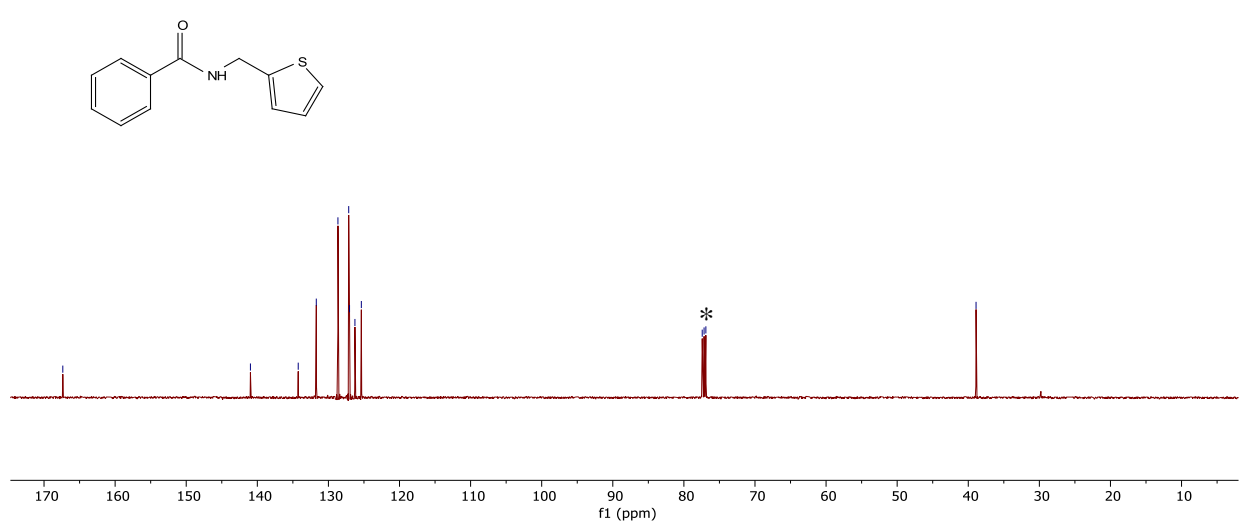



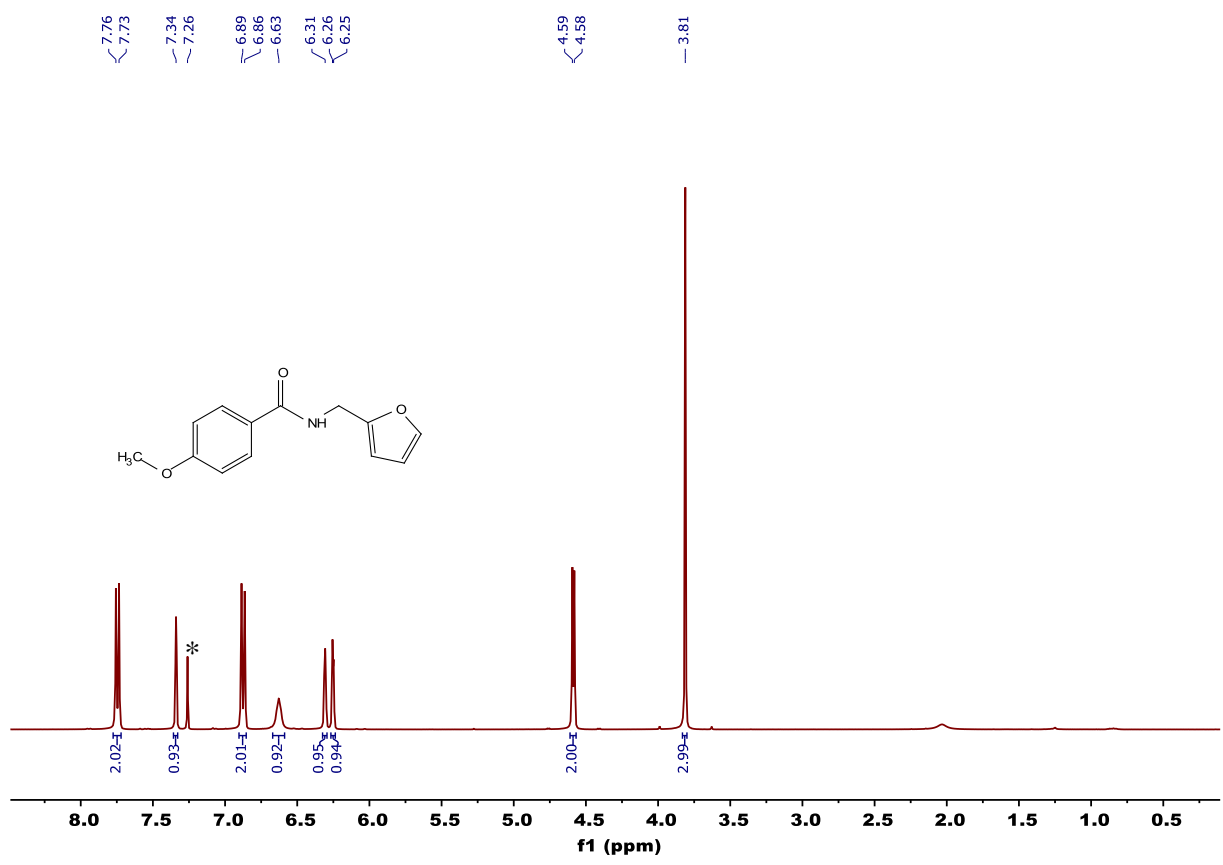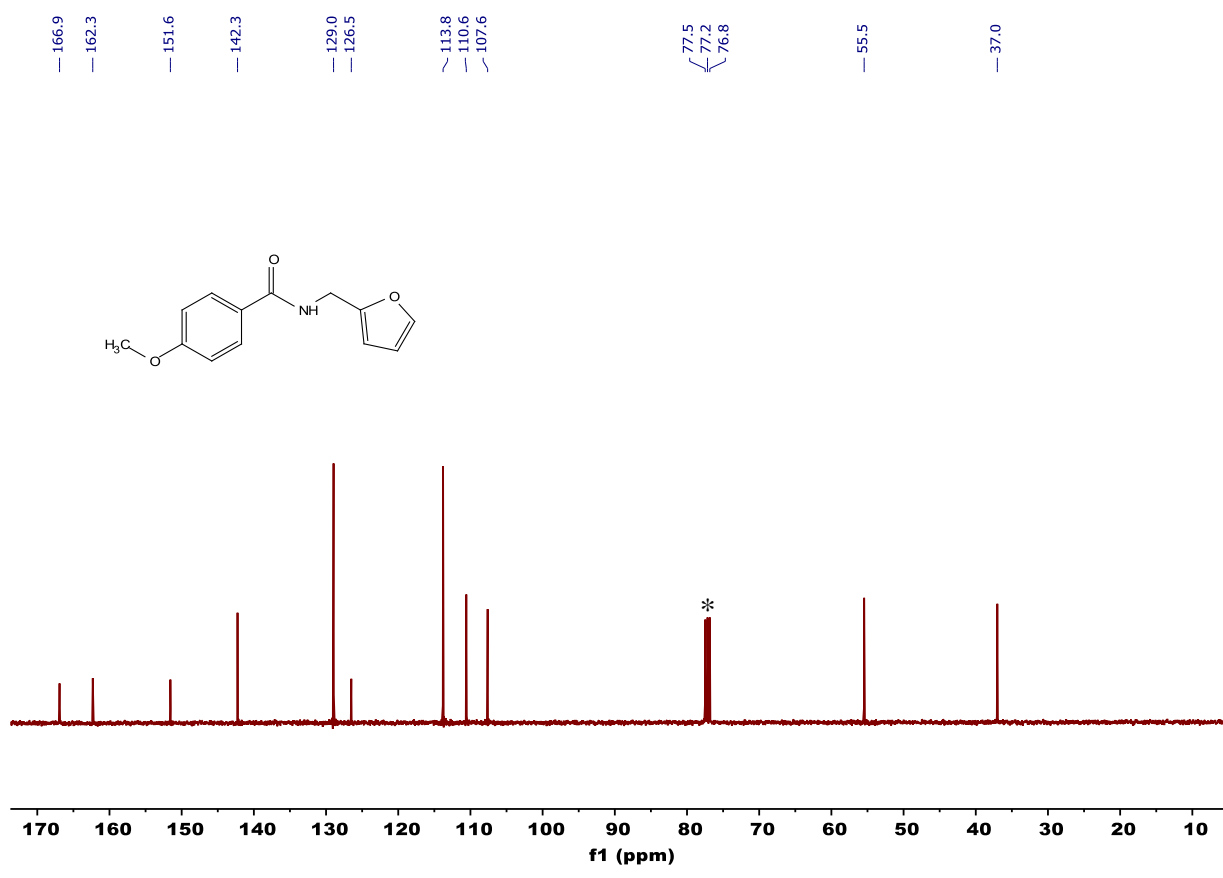

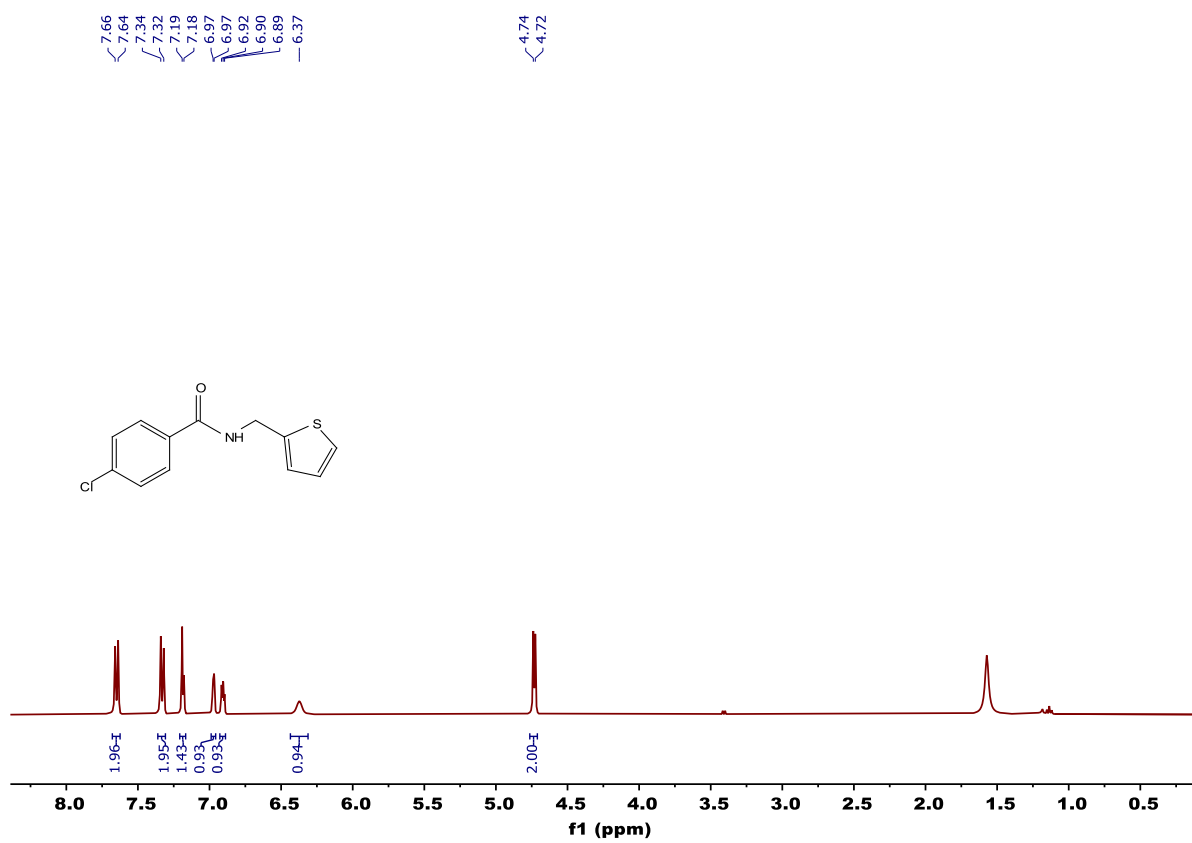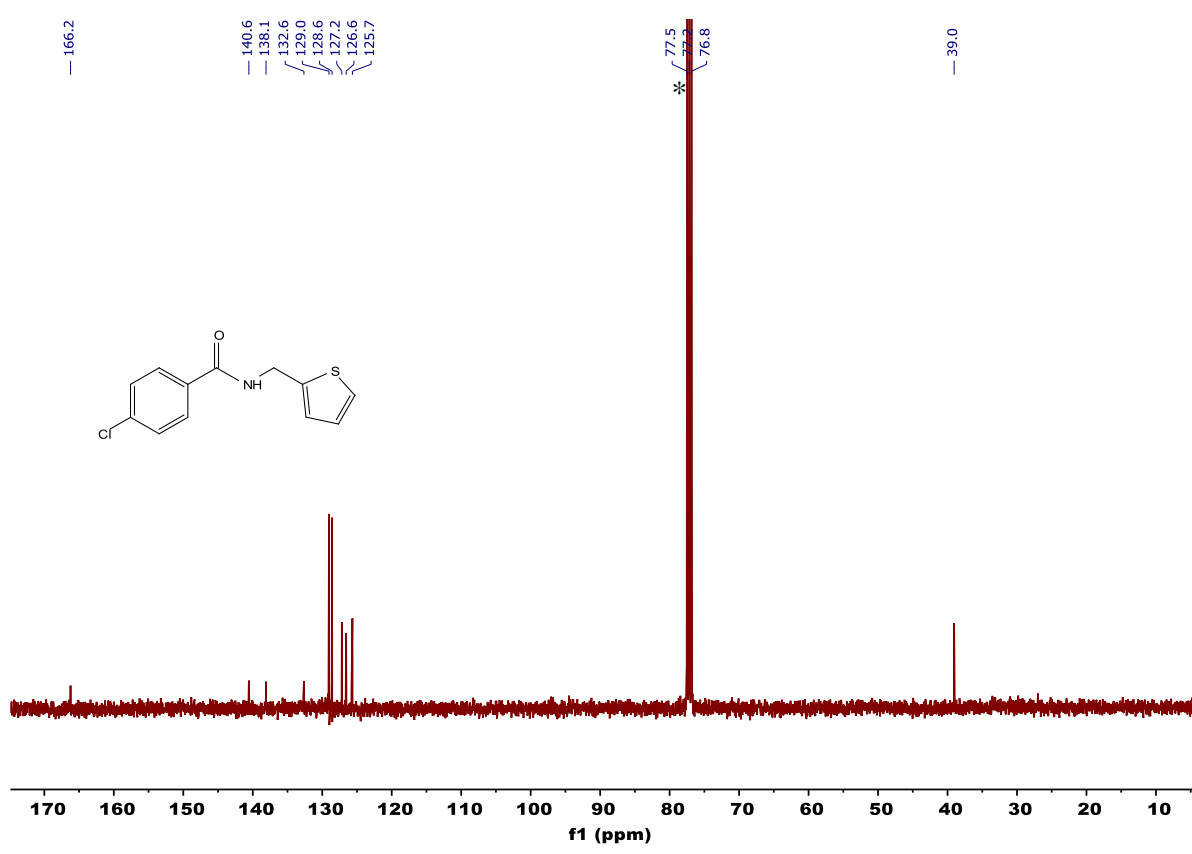

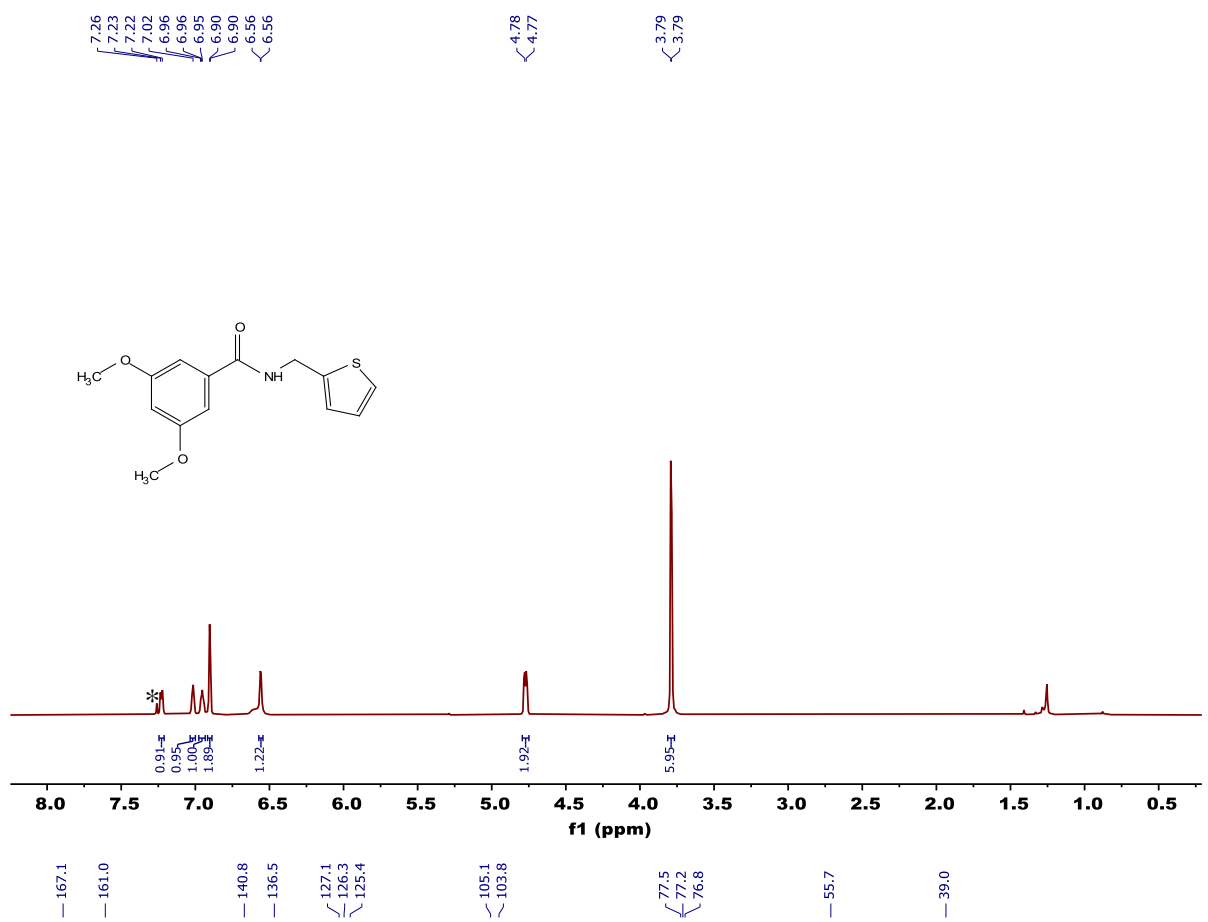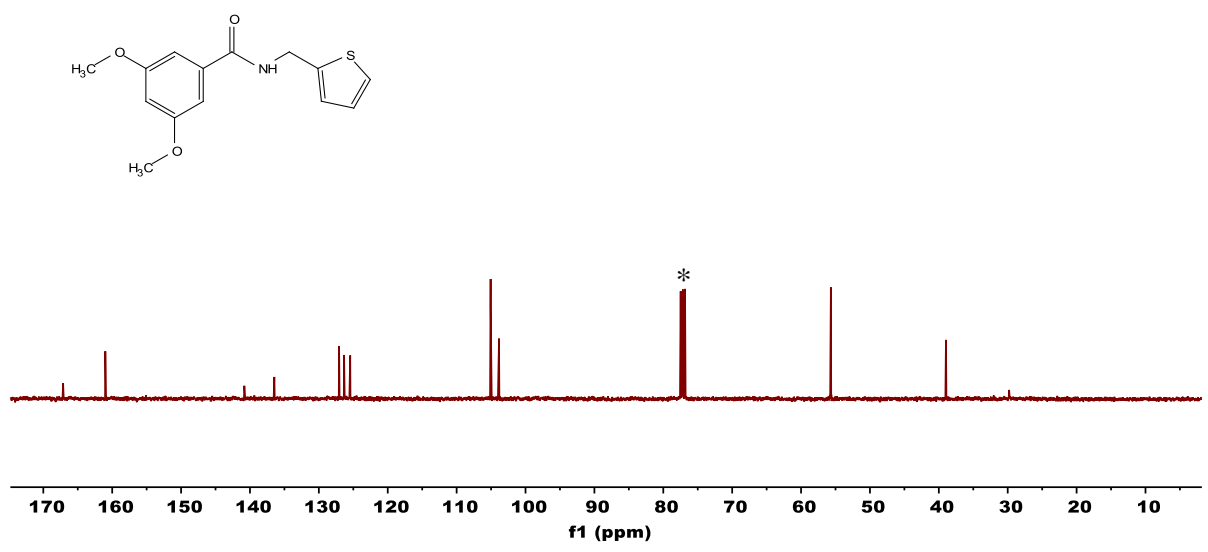

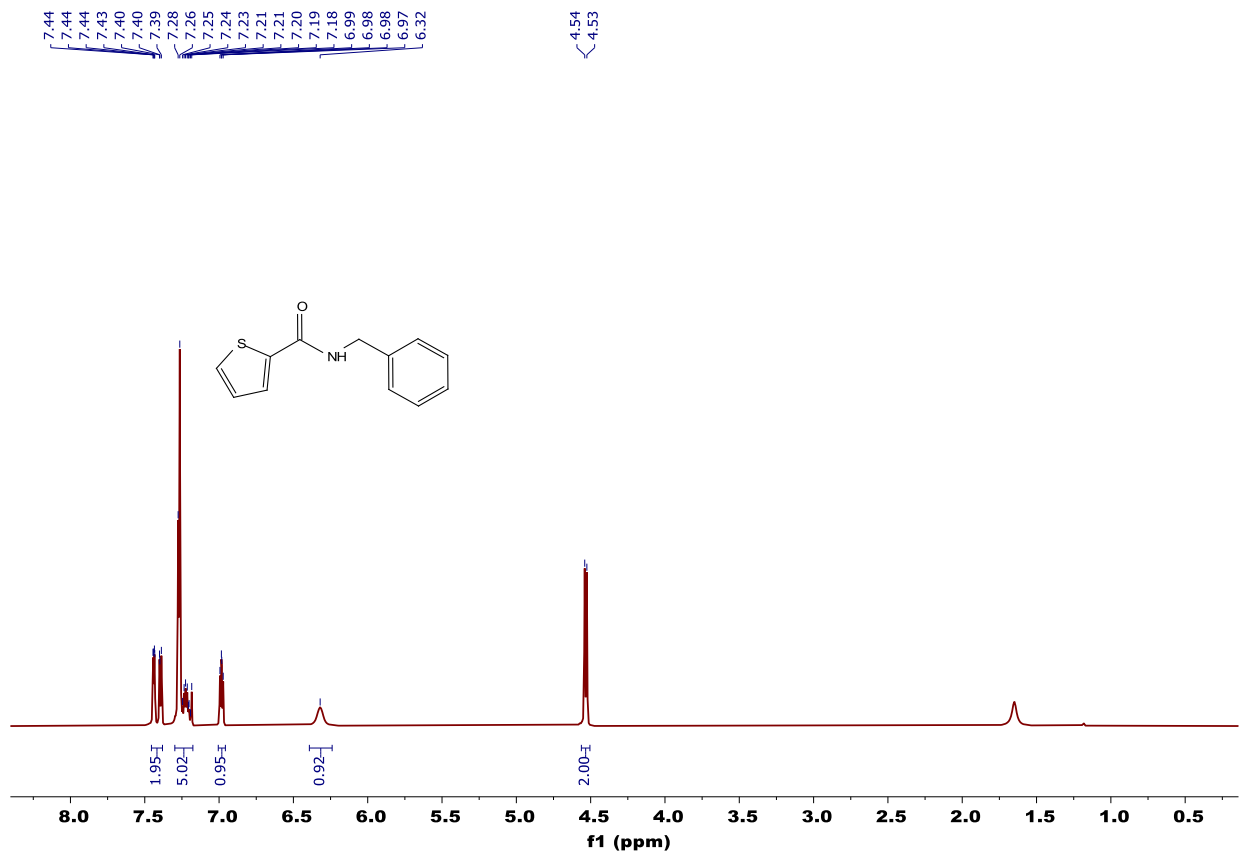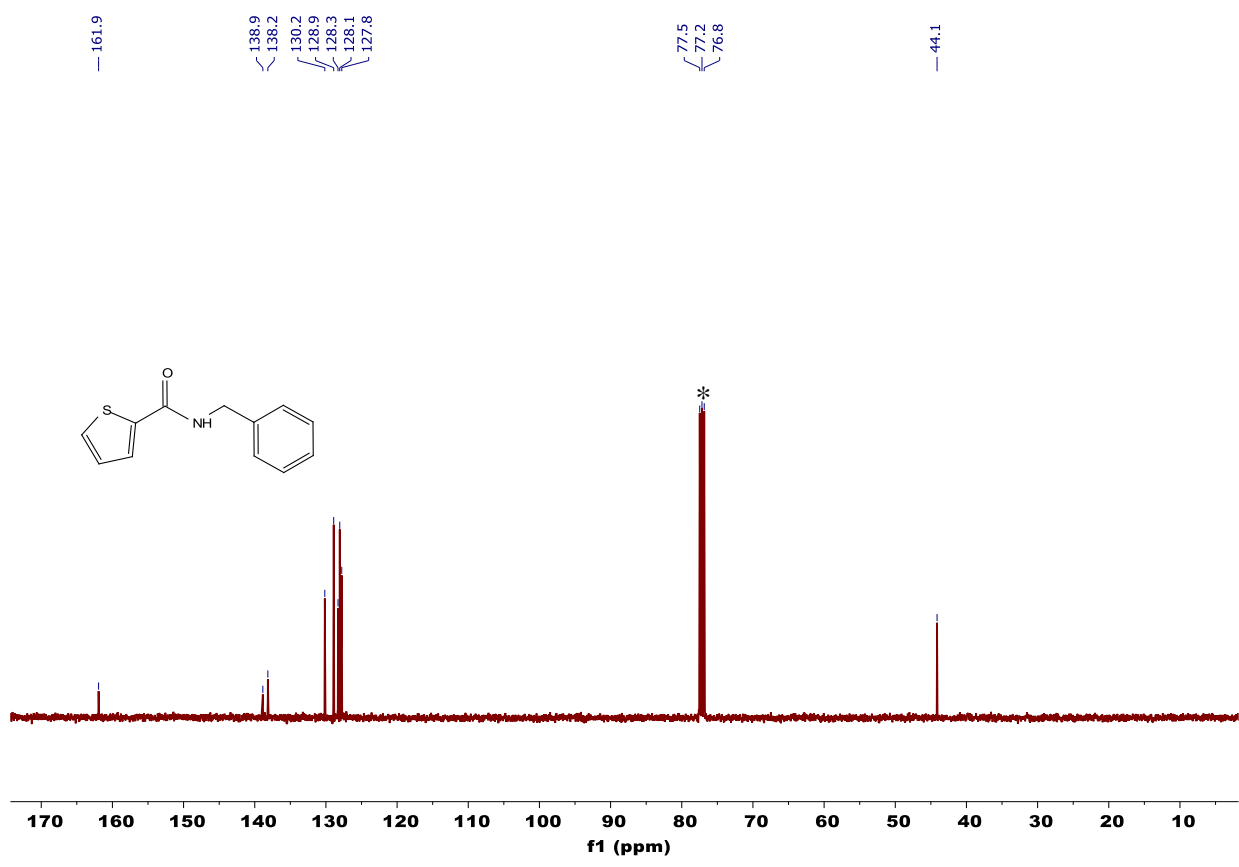

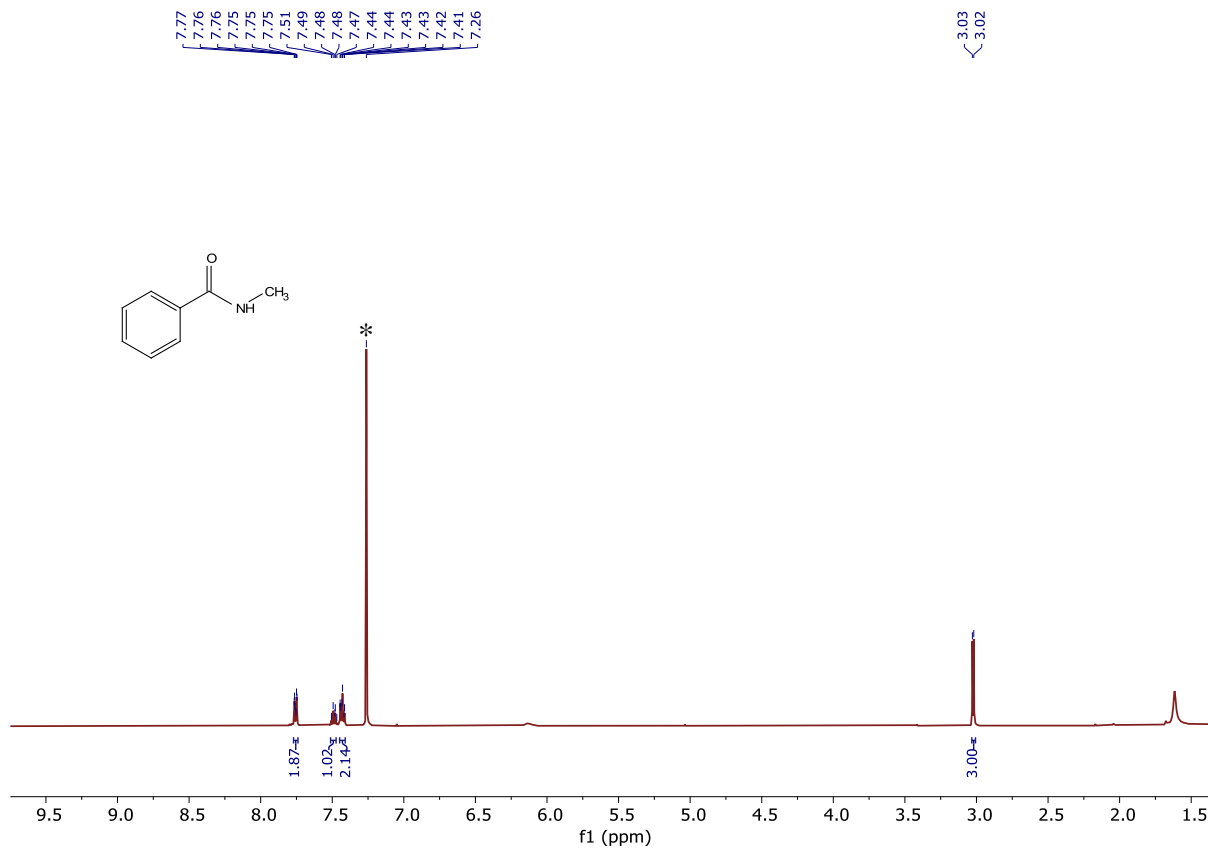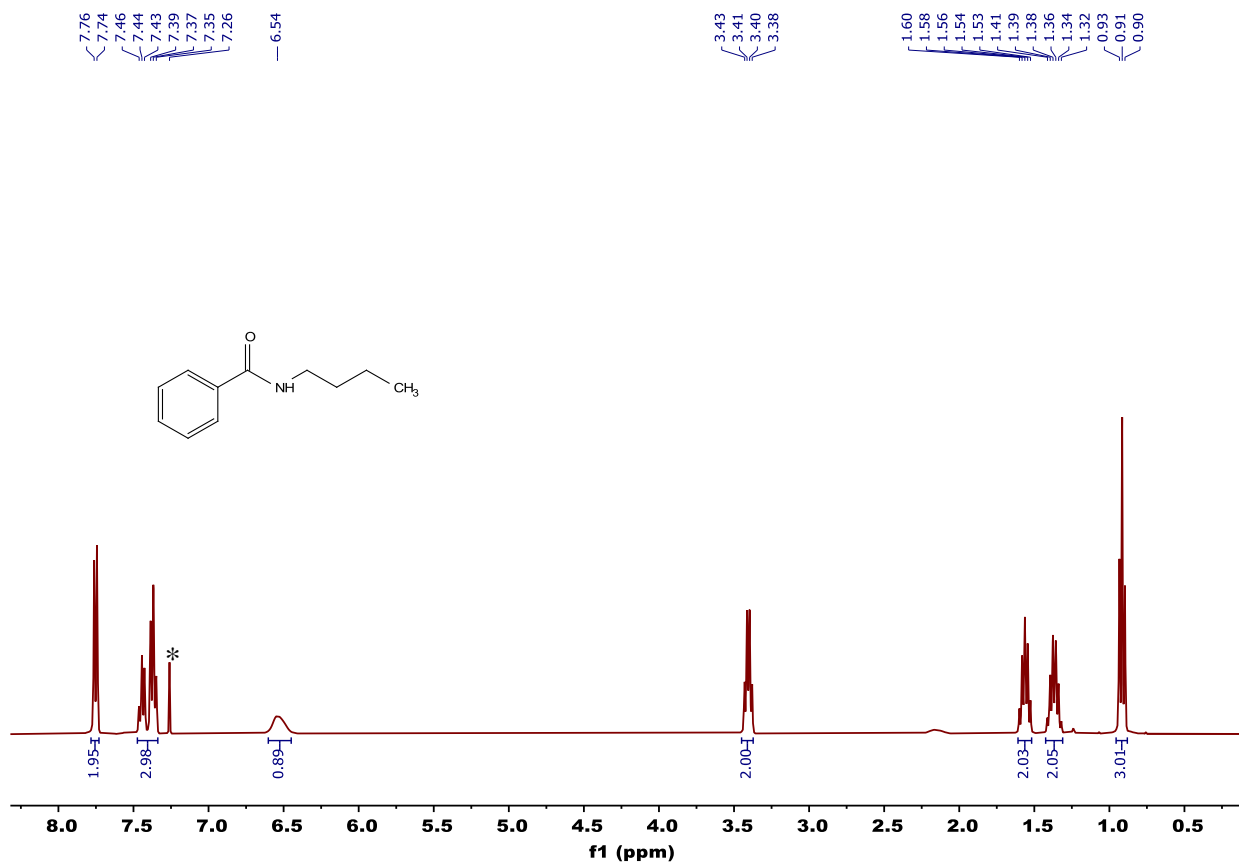

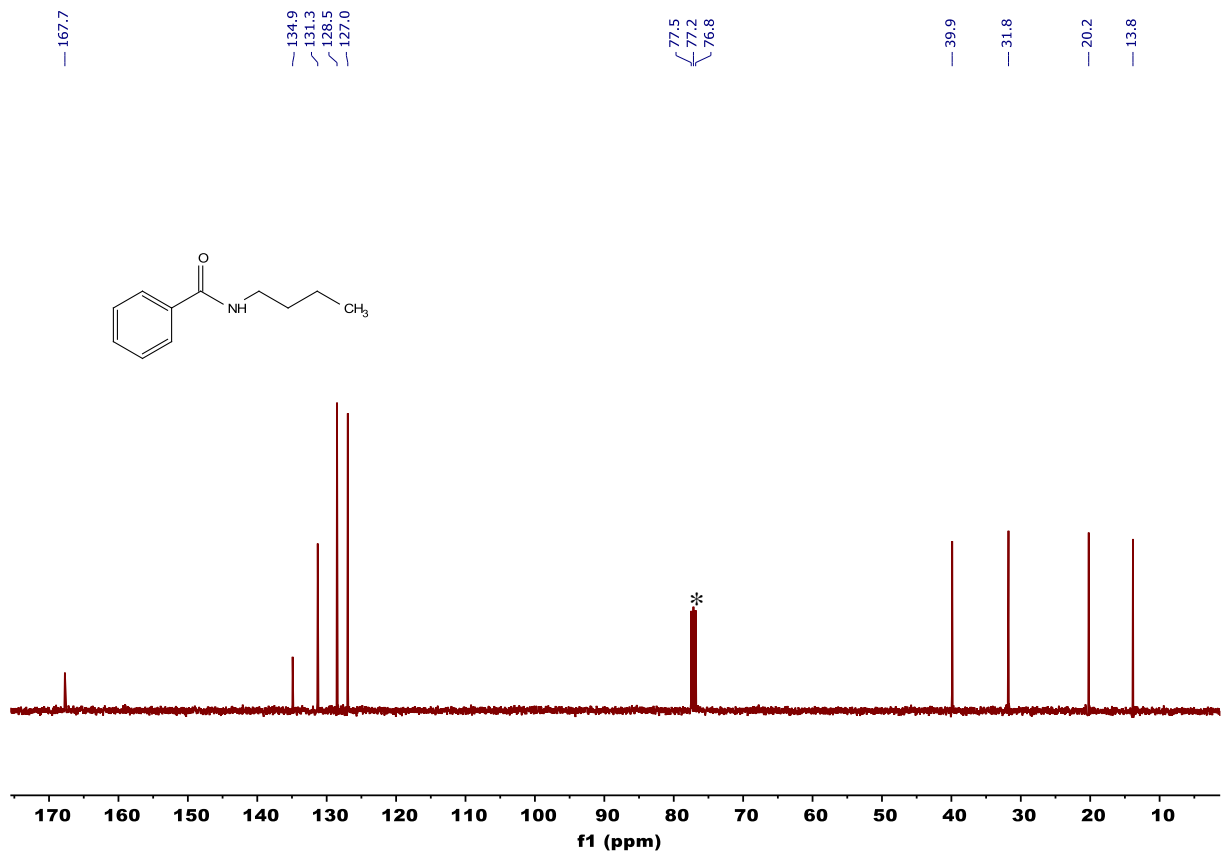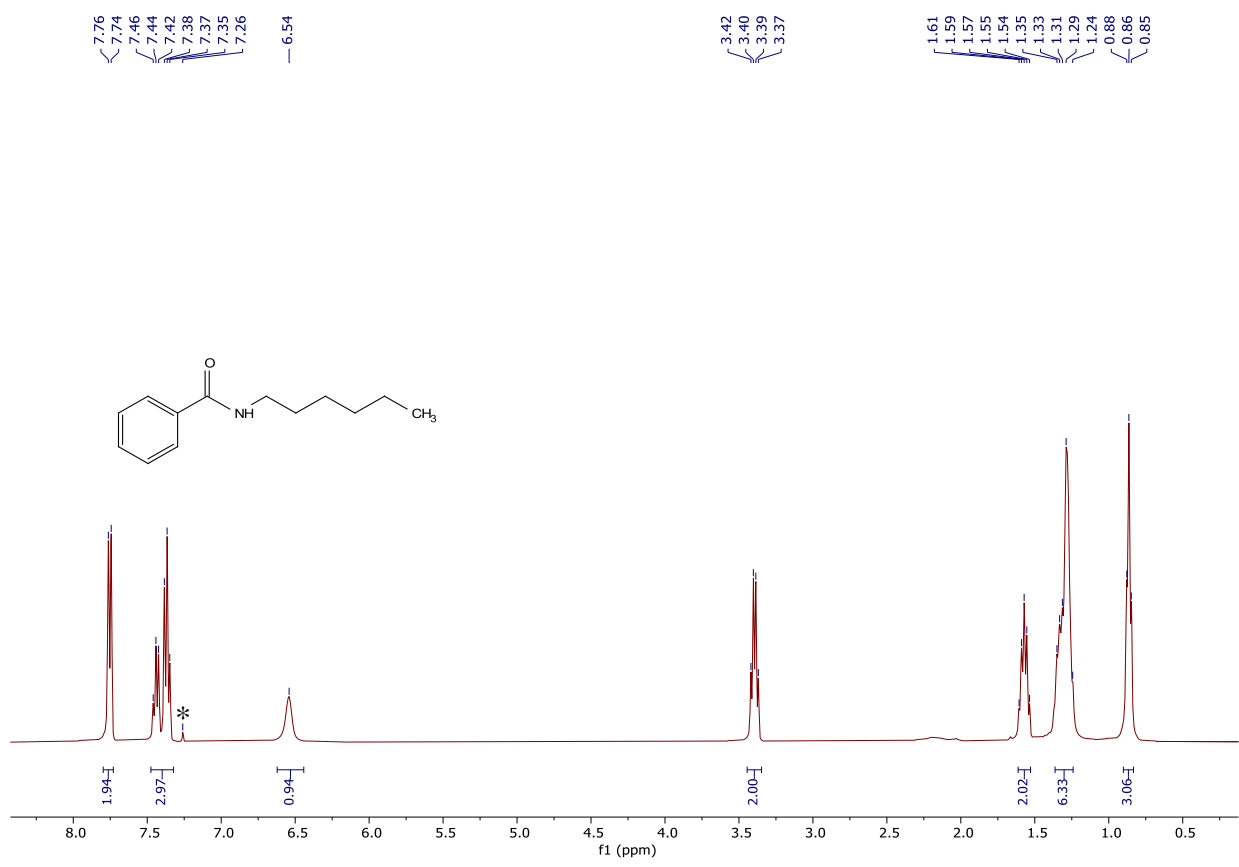

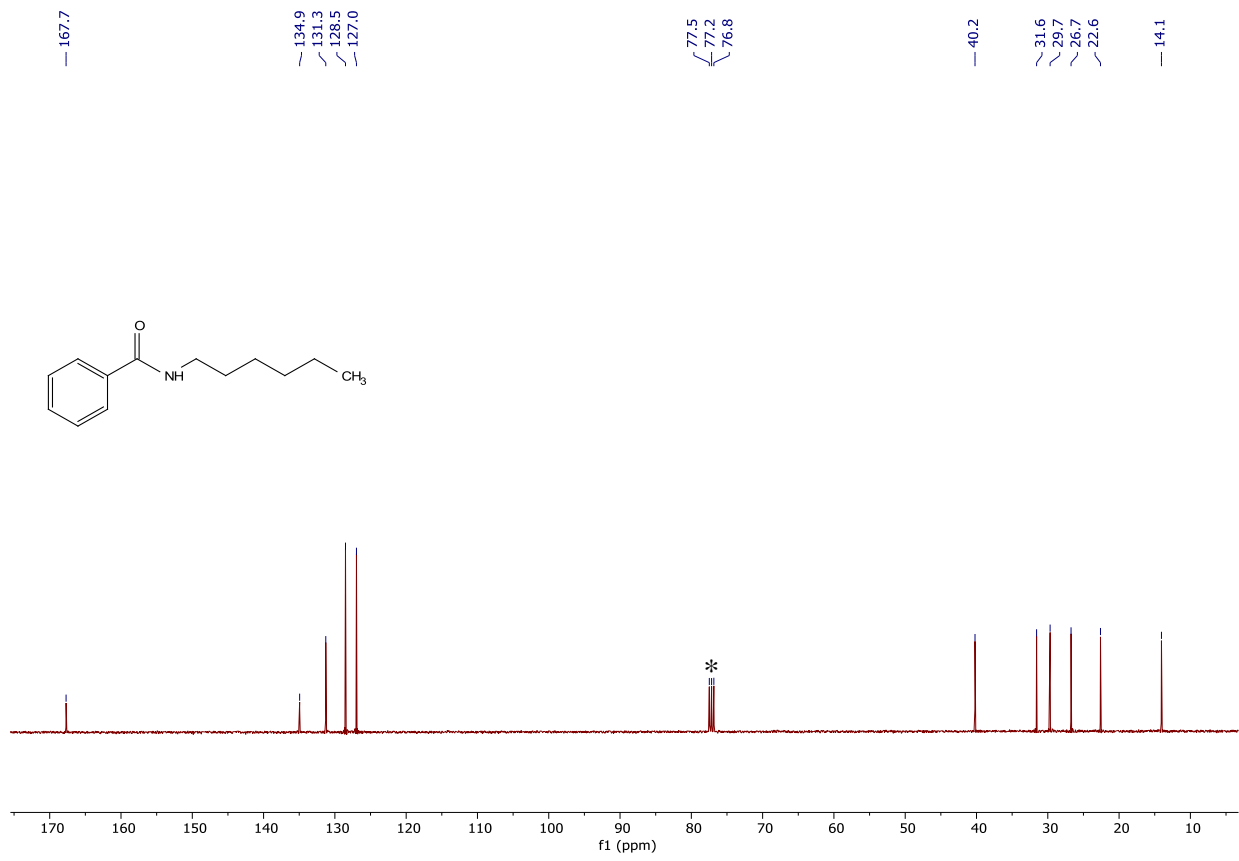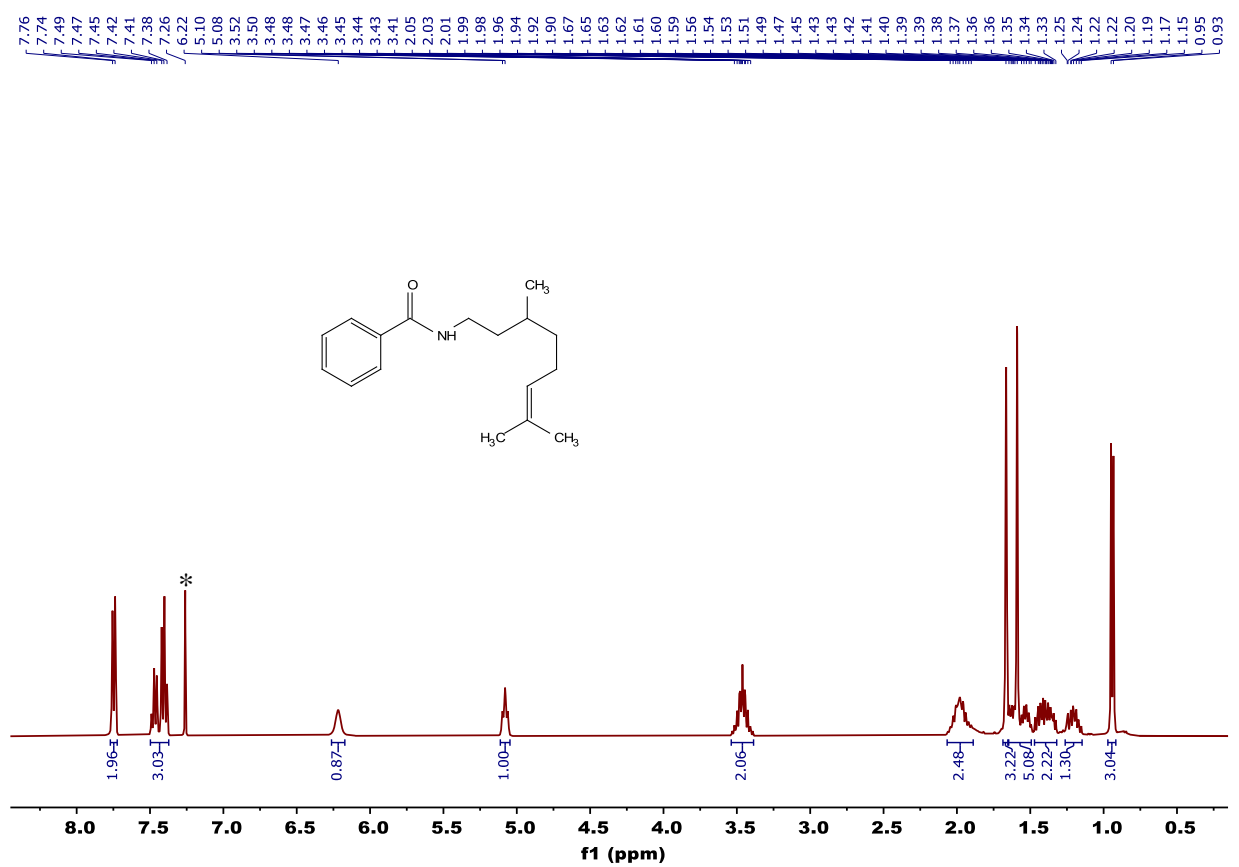

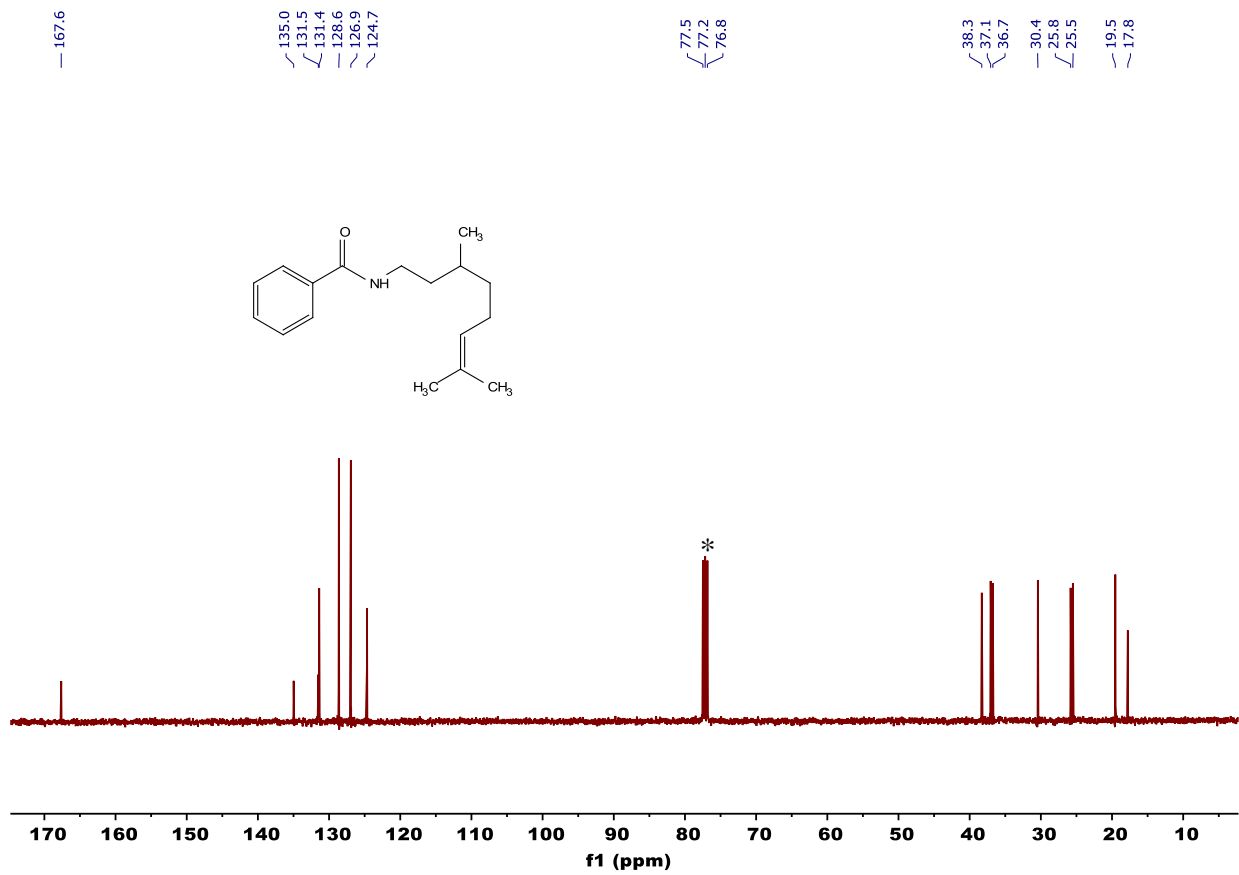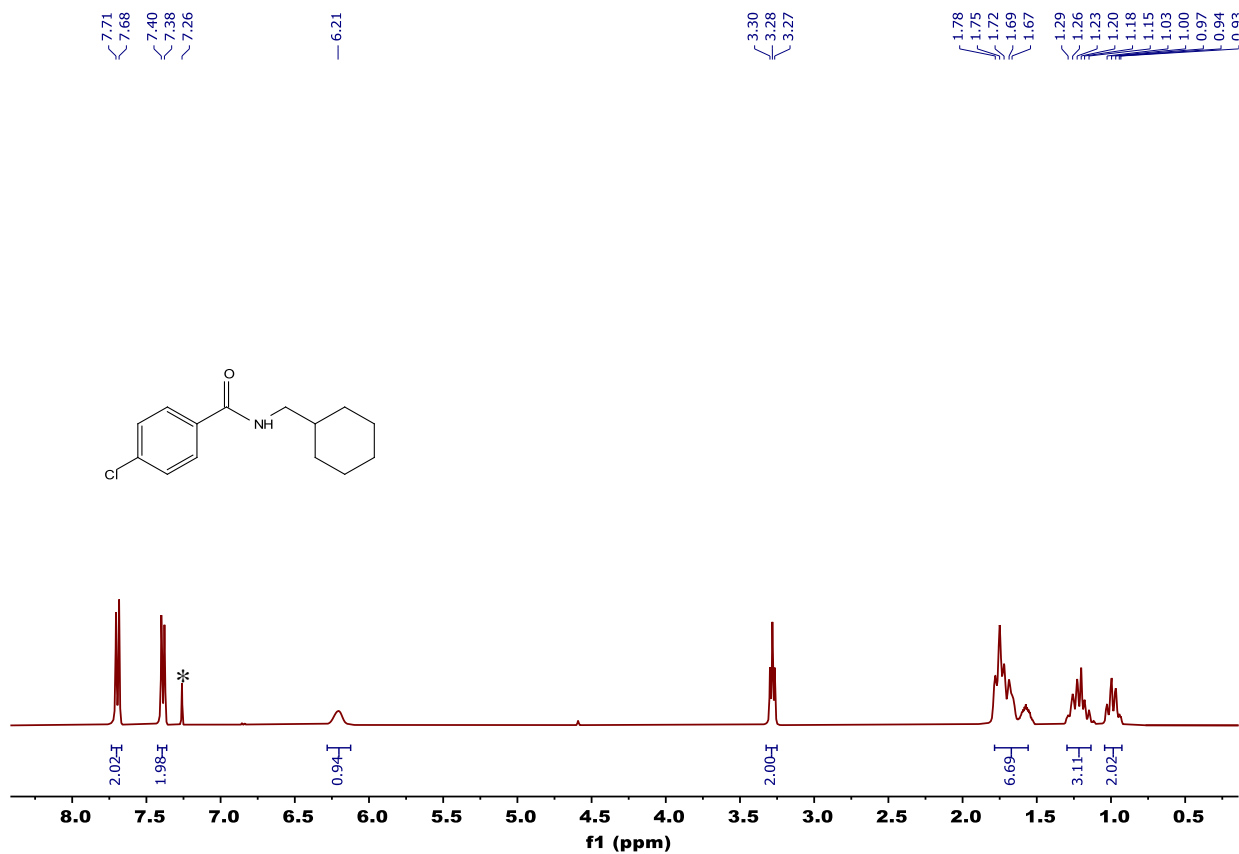



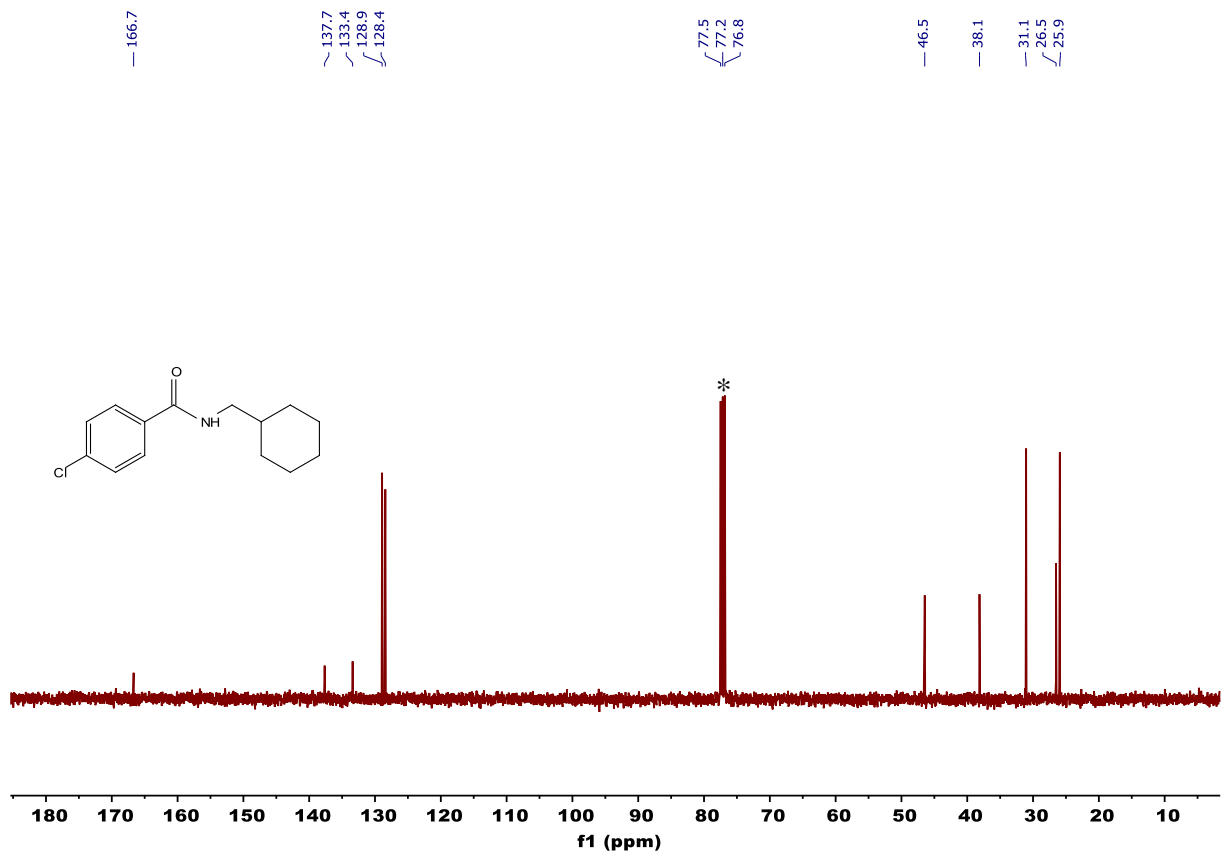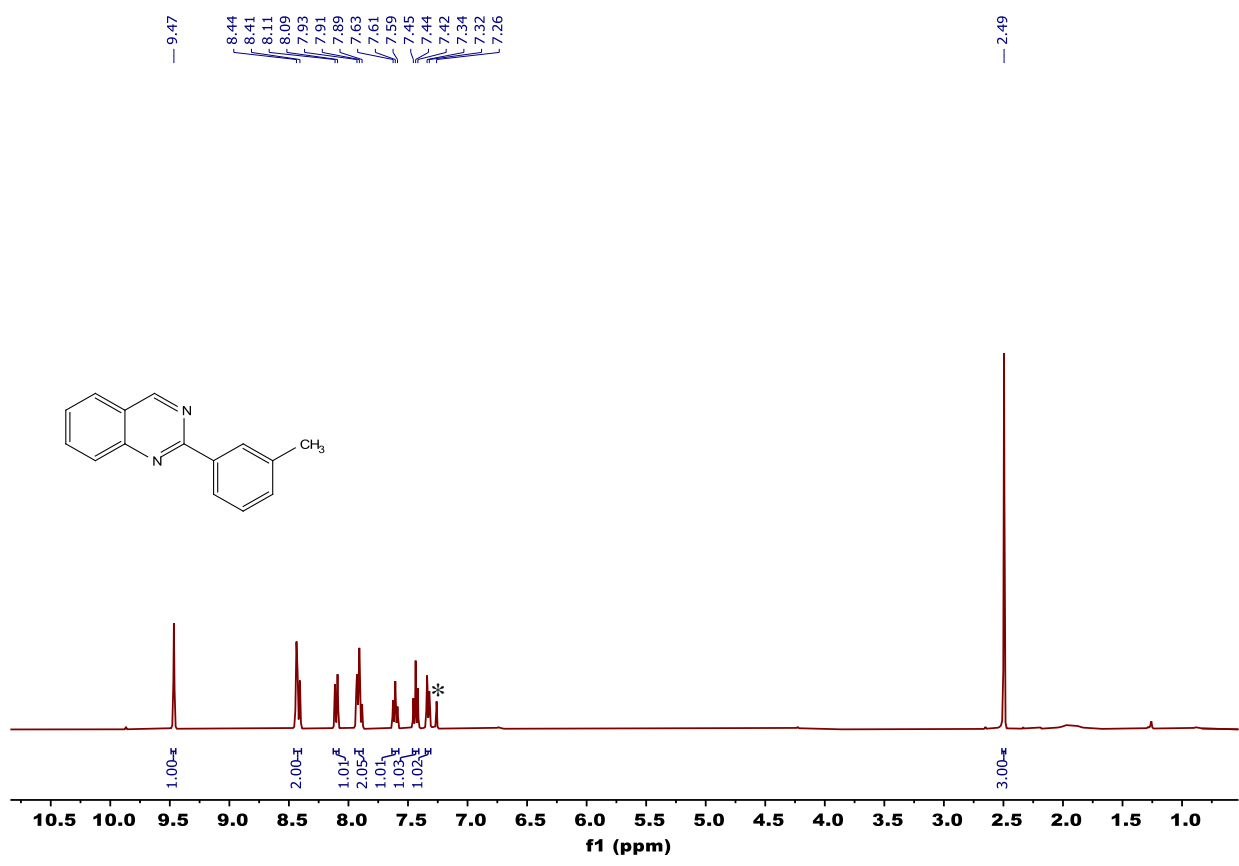

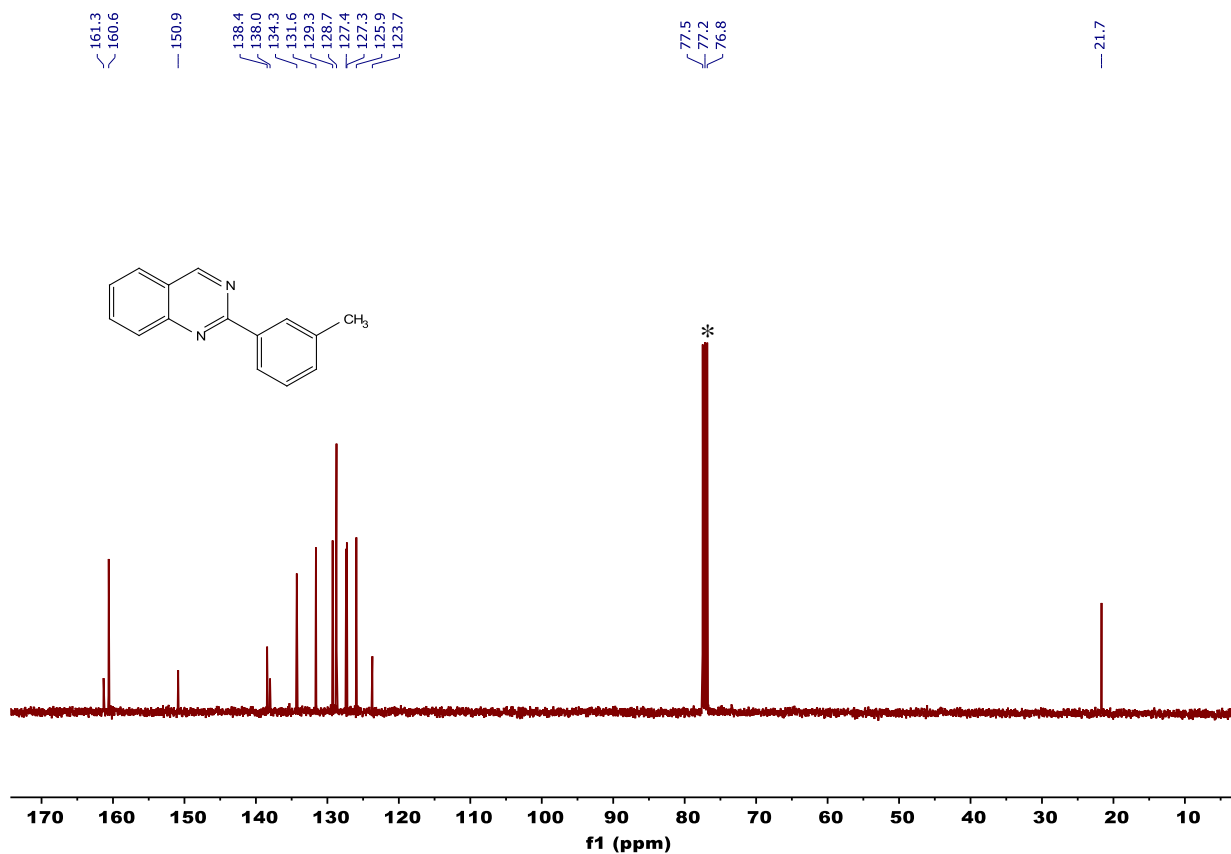

$^1\text{H}$  and  $^{13}\text{C}\{^1\text{H}\}$  NMR spectra of isolated compounds 6a-6i in  $\text{DMSO-}d_6$  (\*) from catalytic reactions

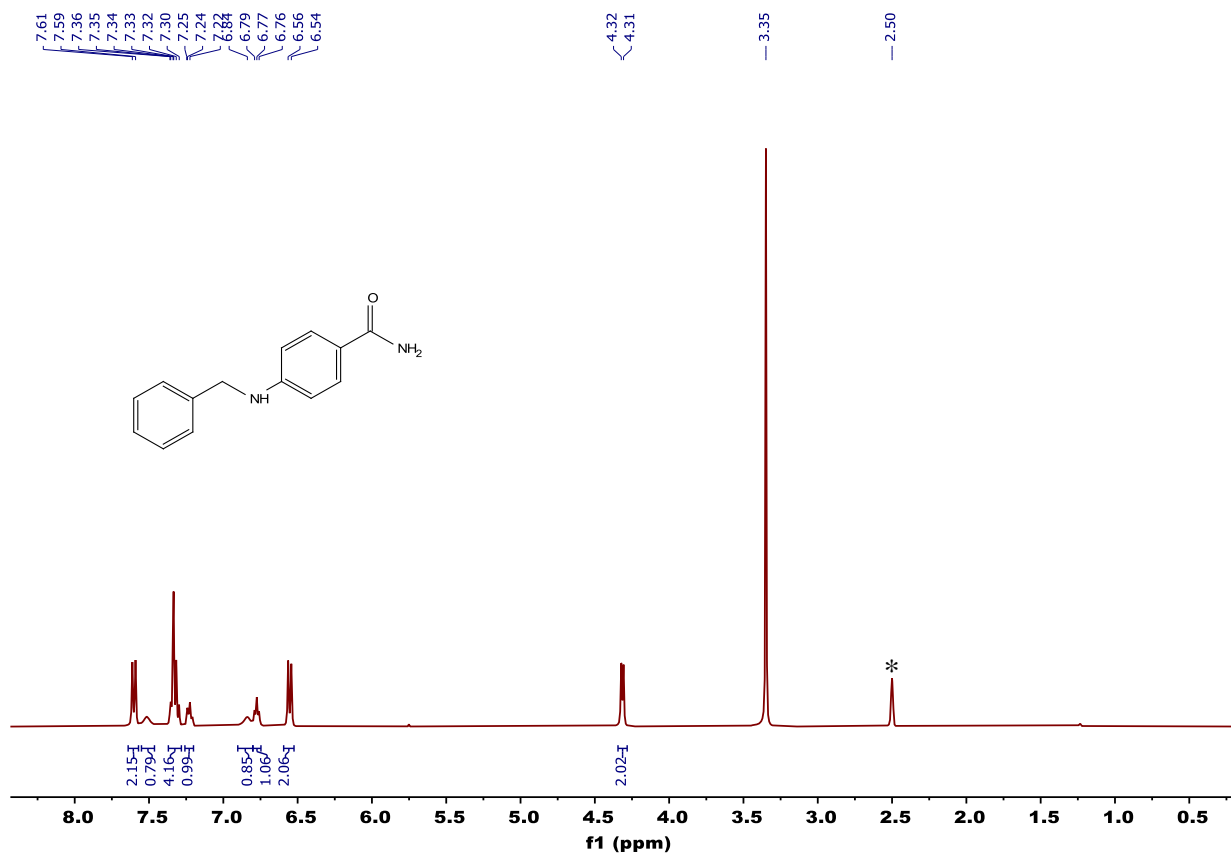

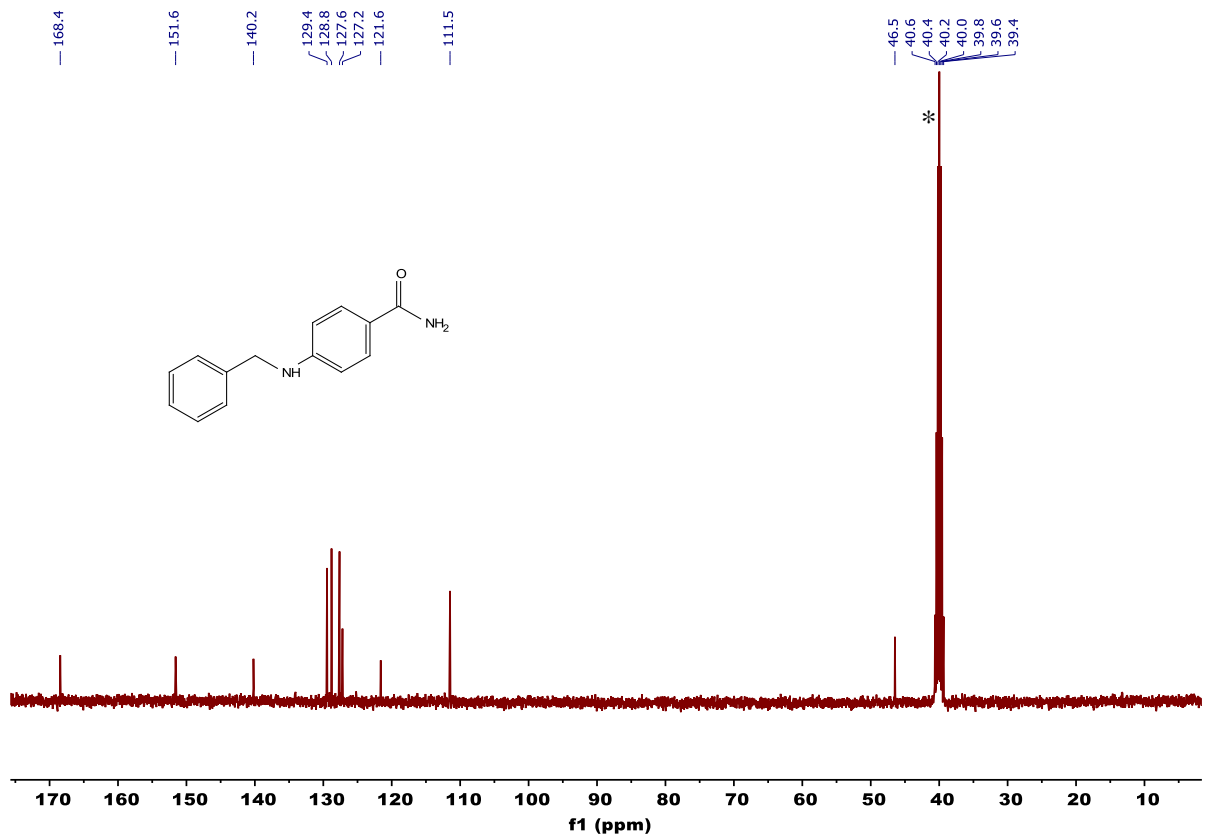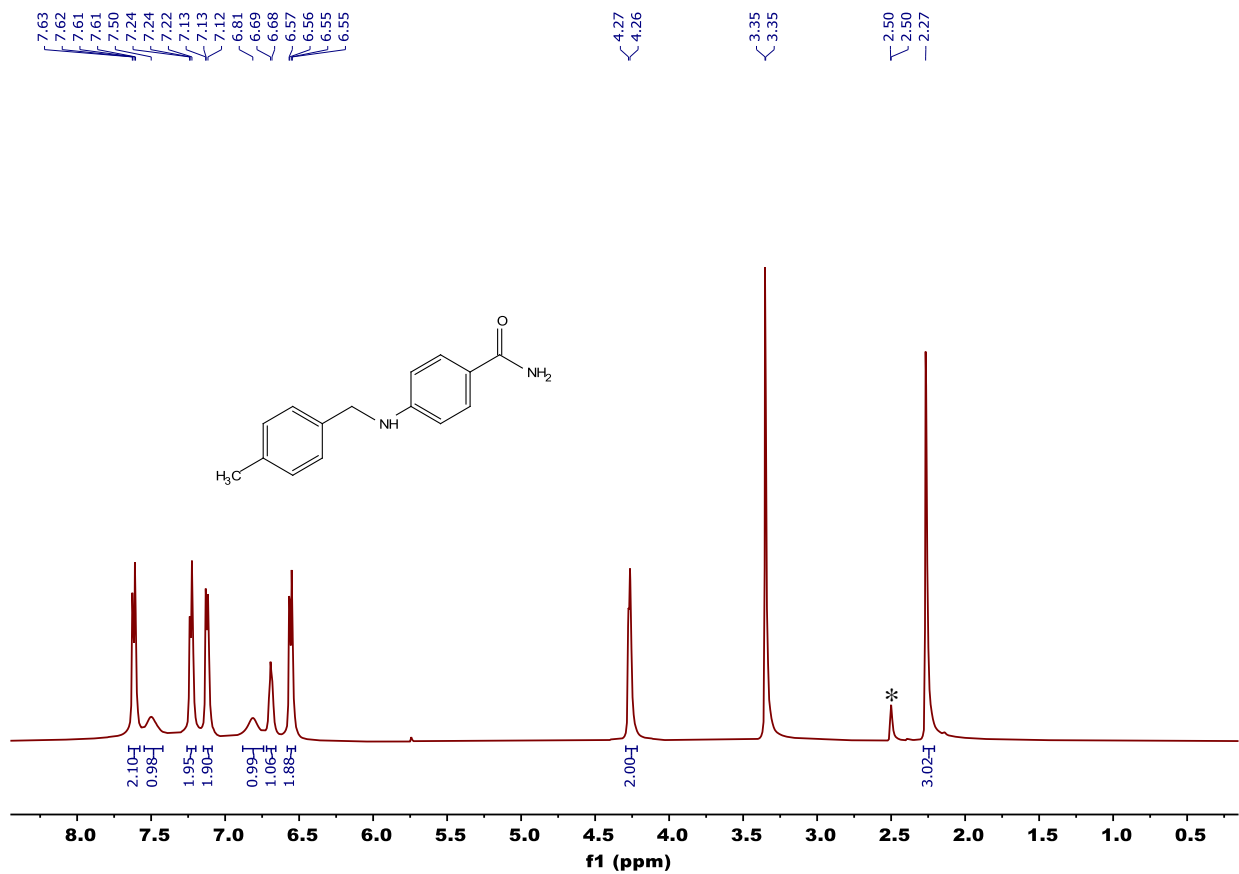

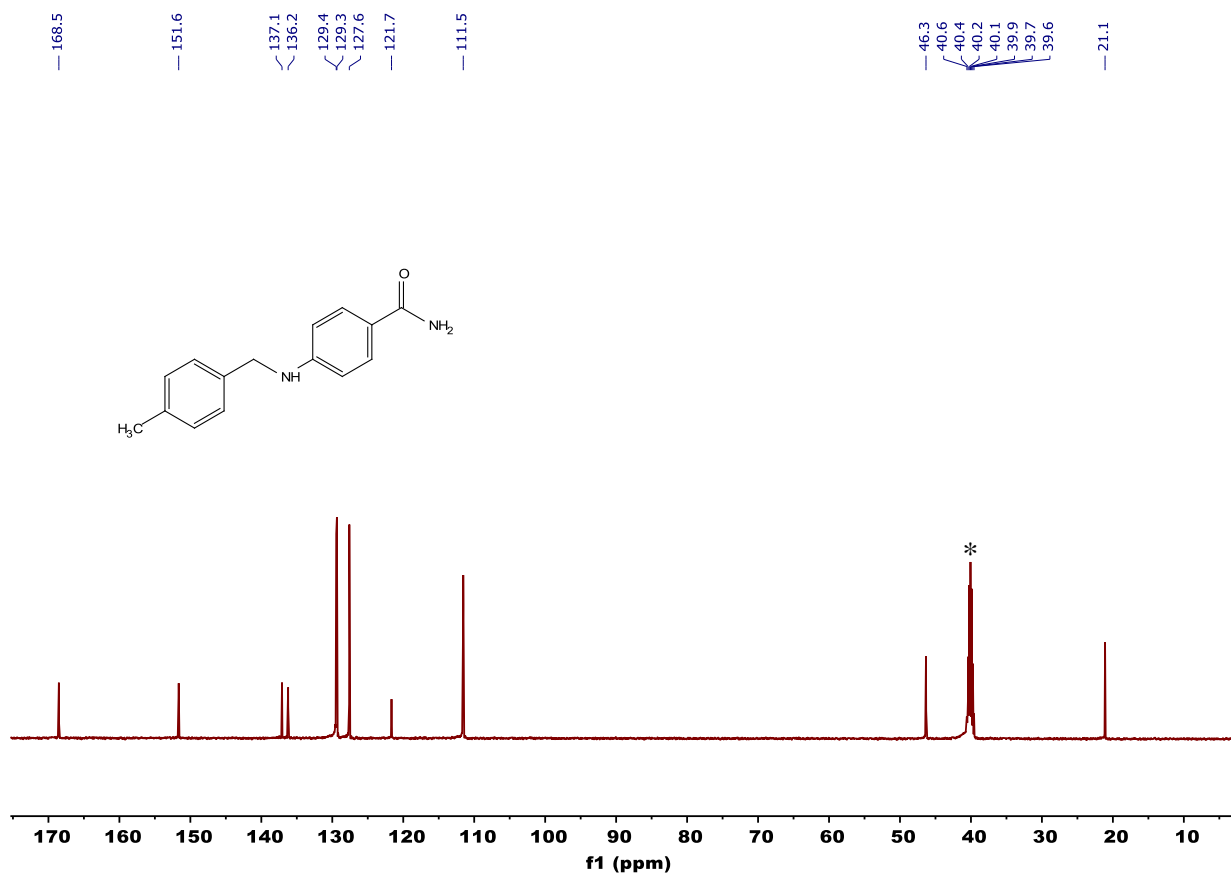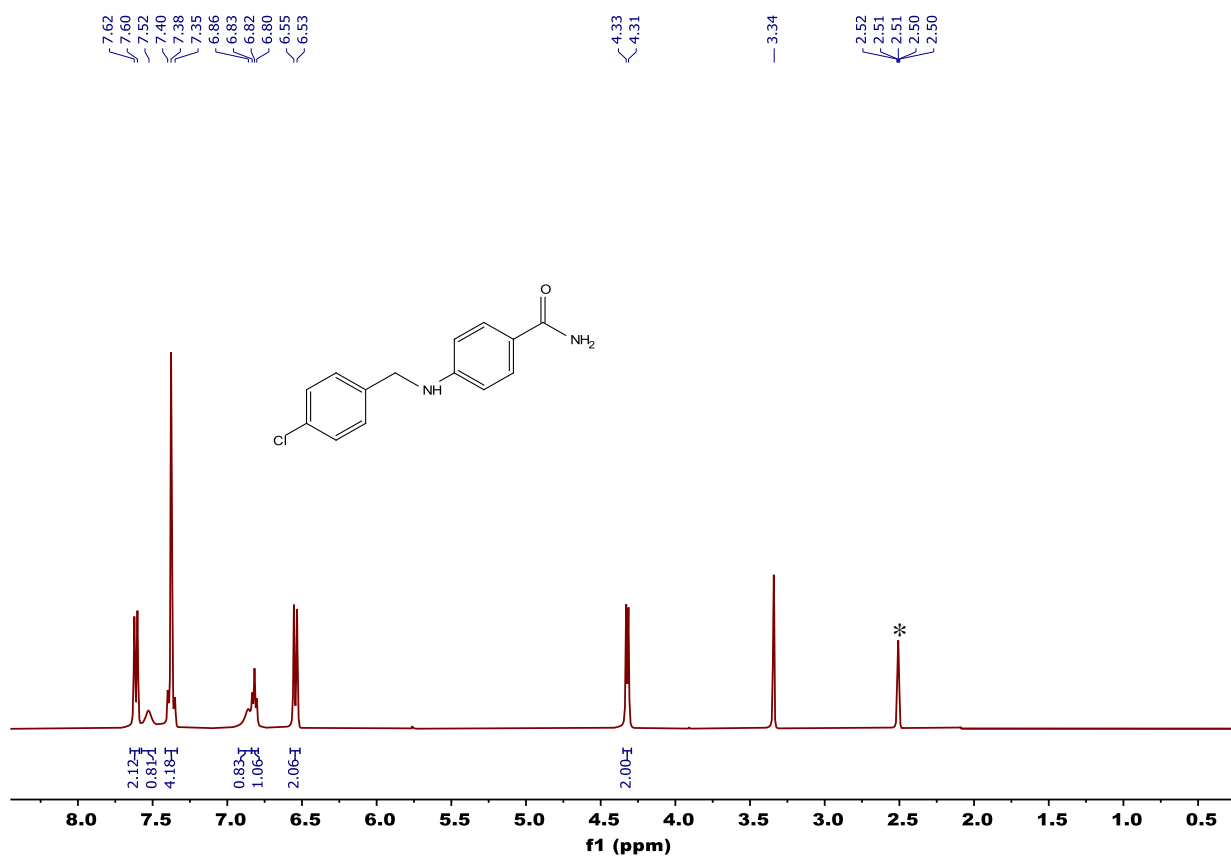

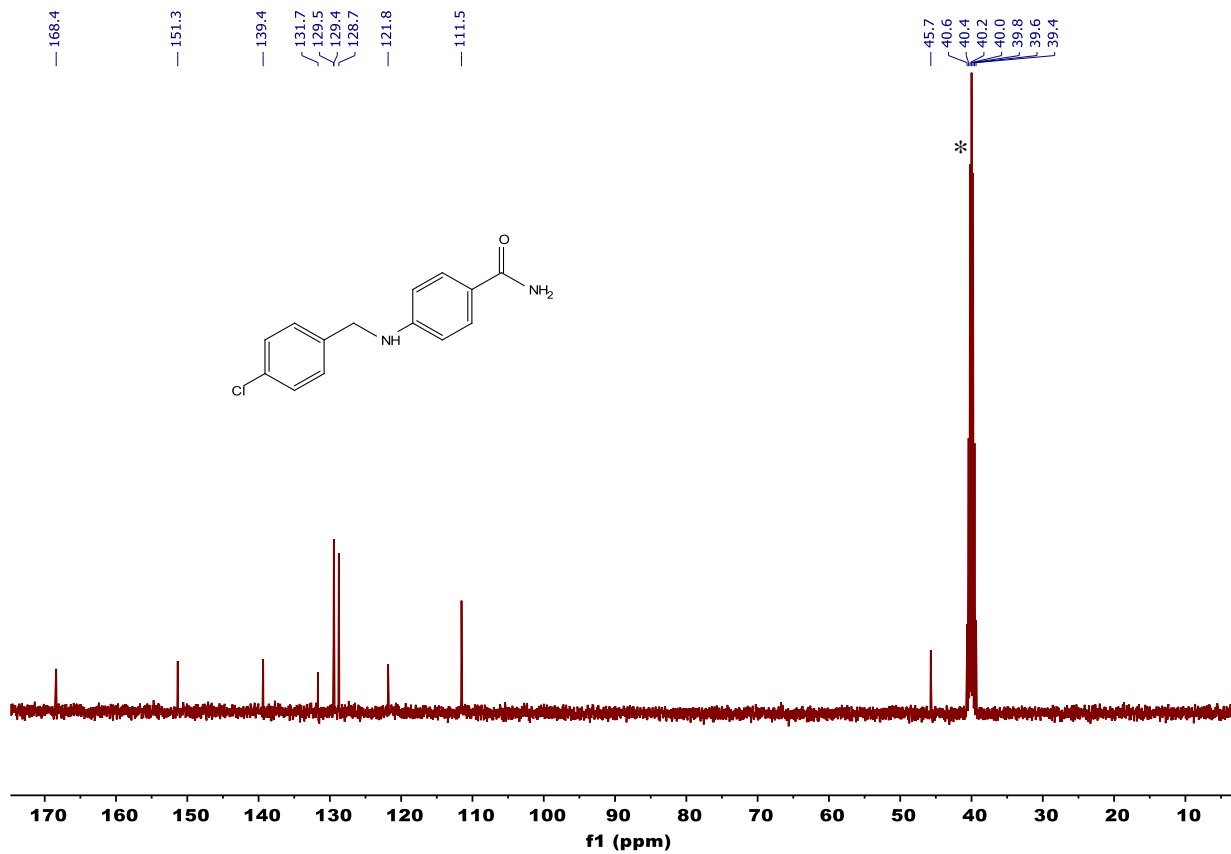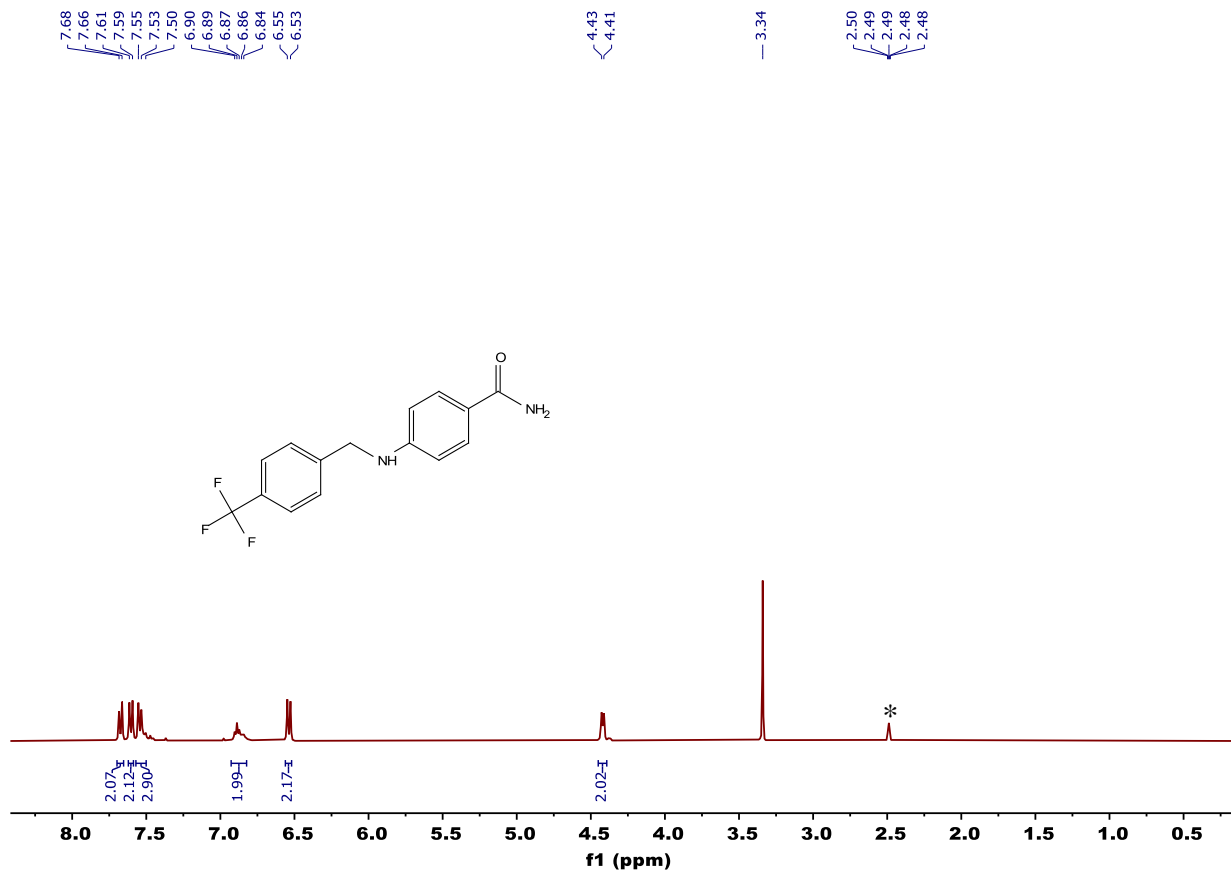

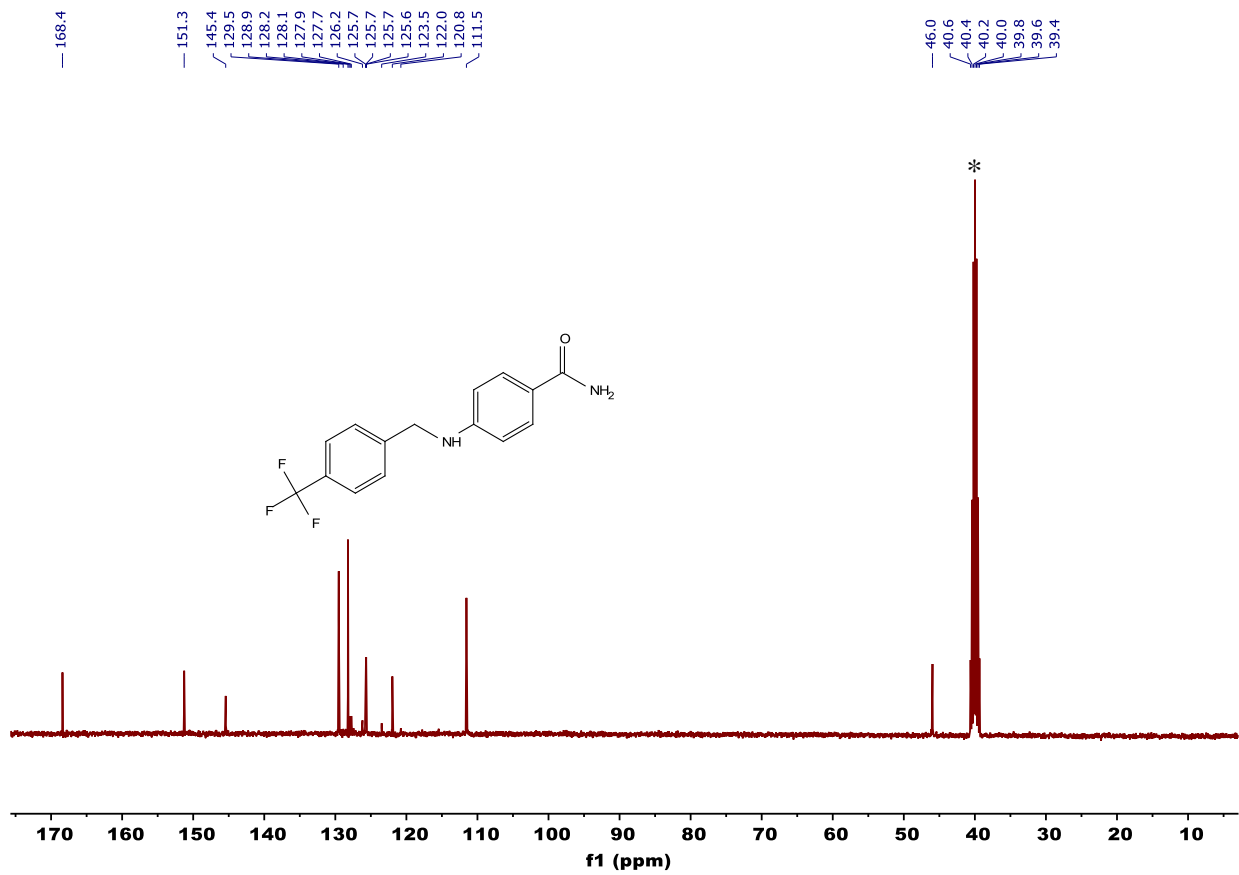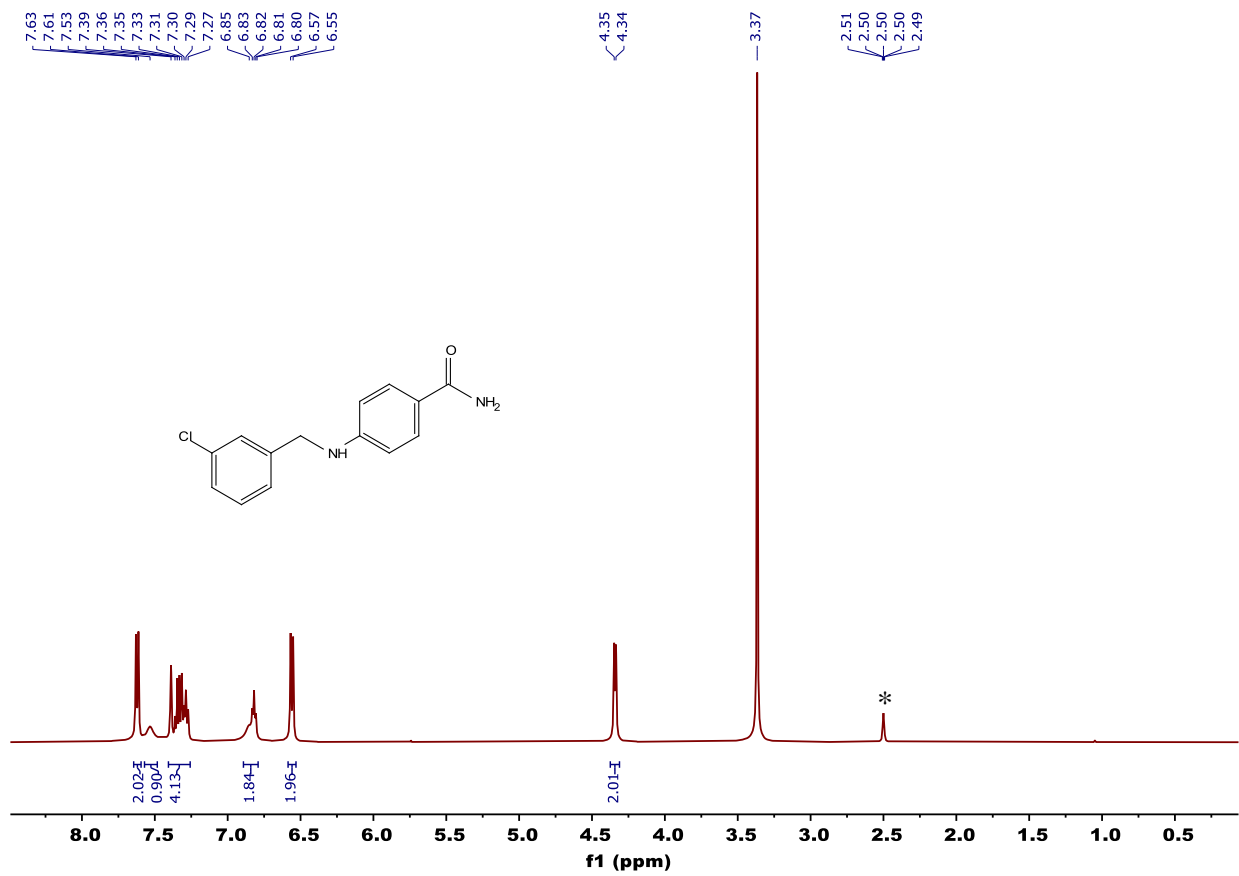

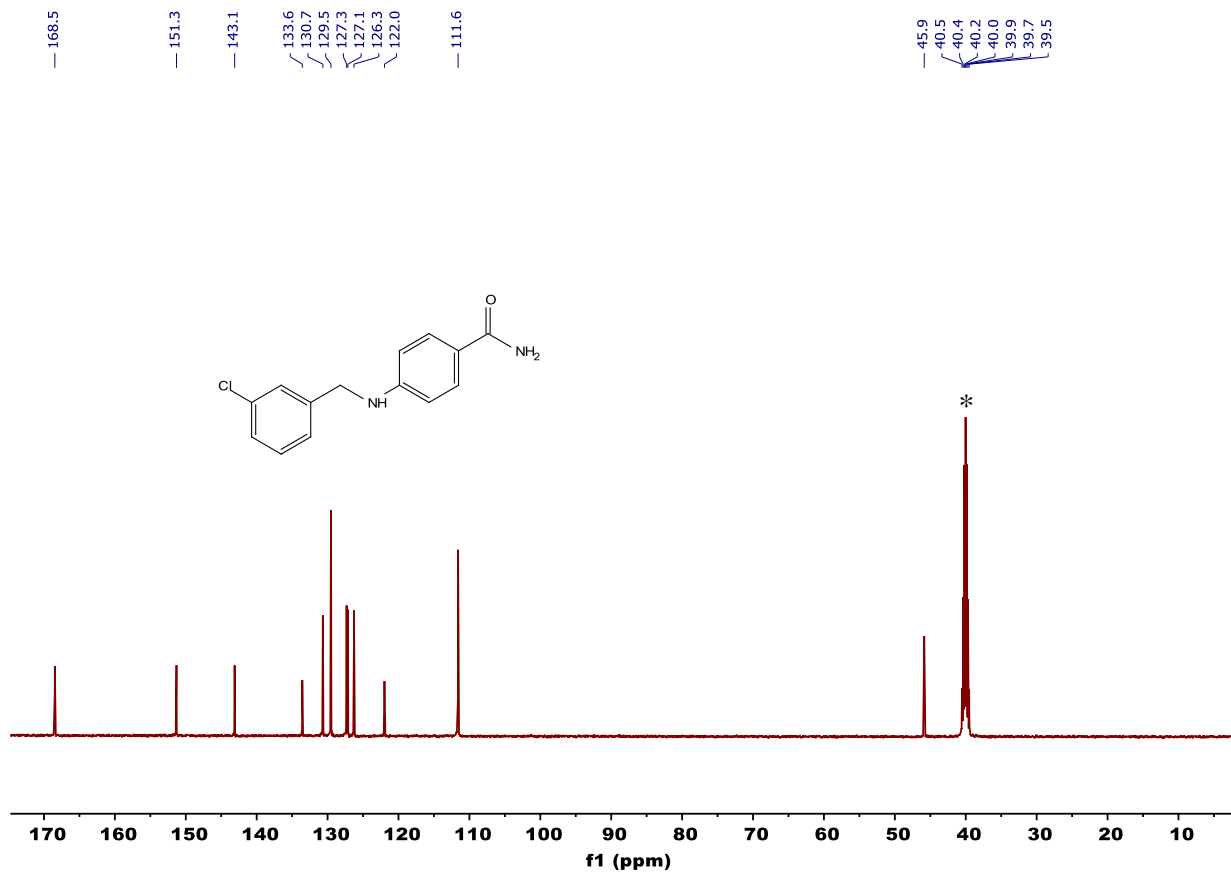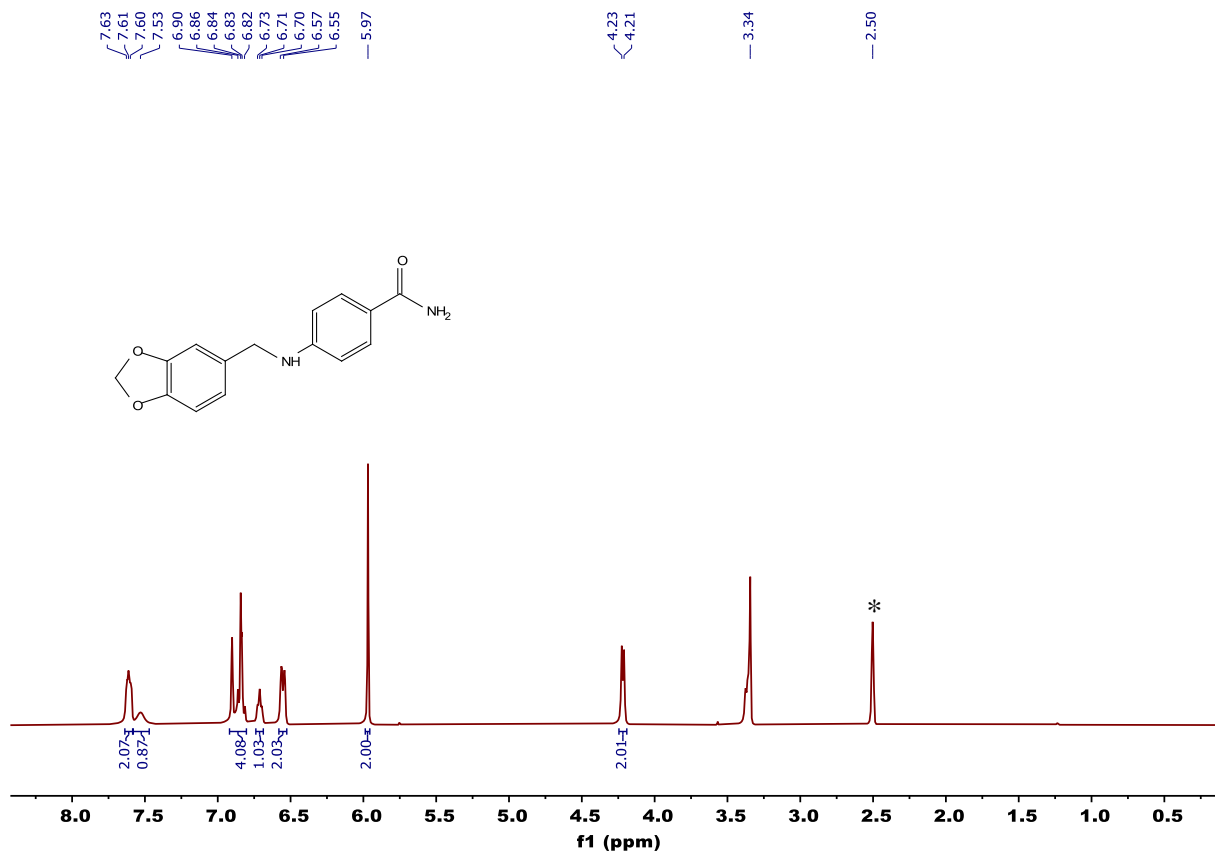

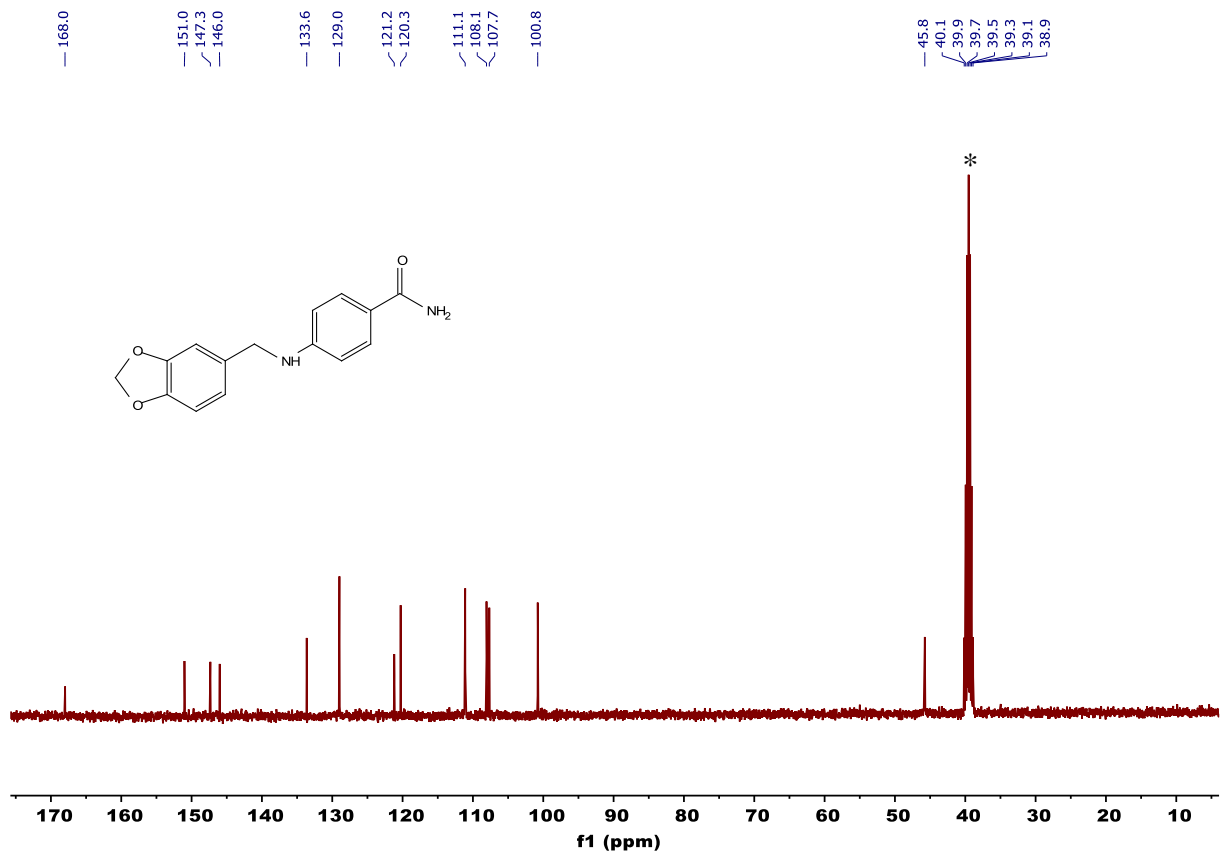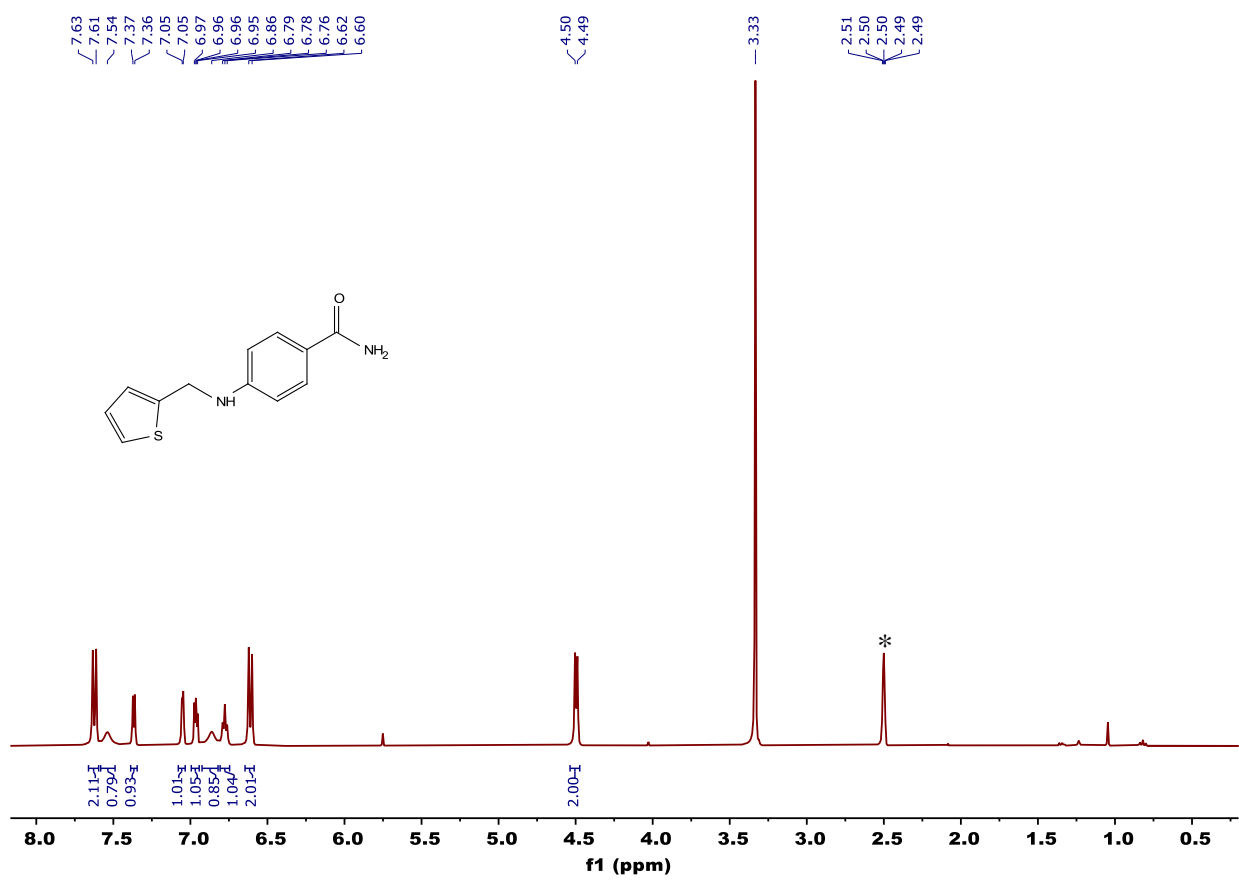



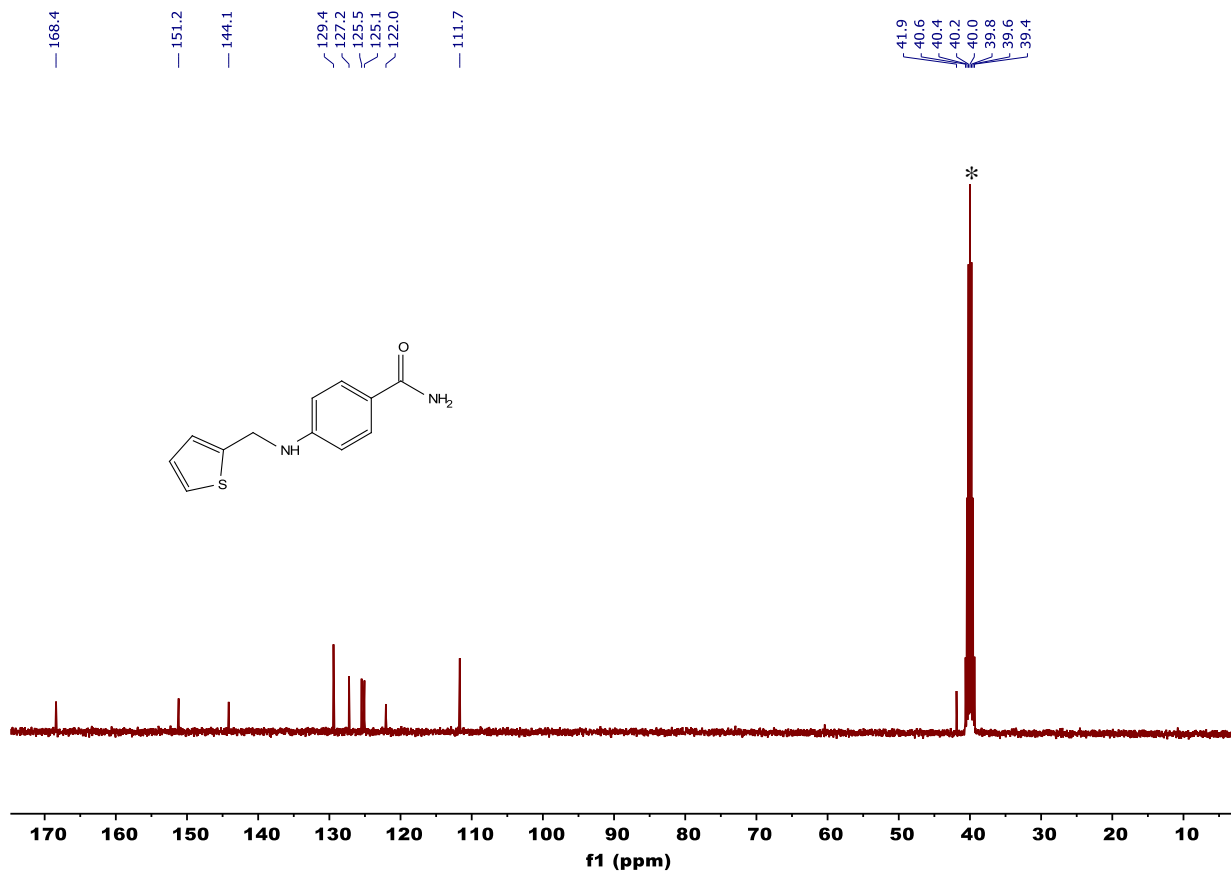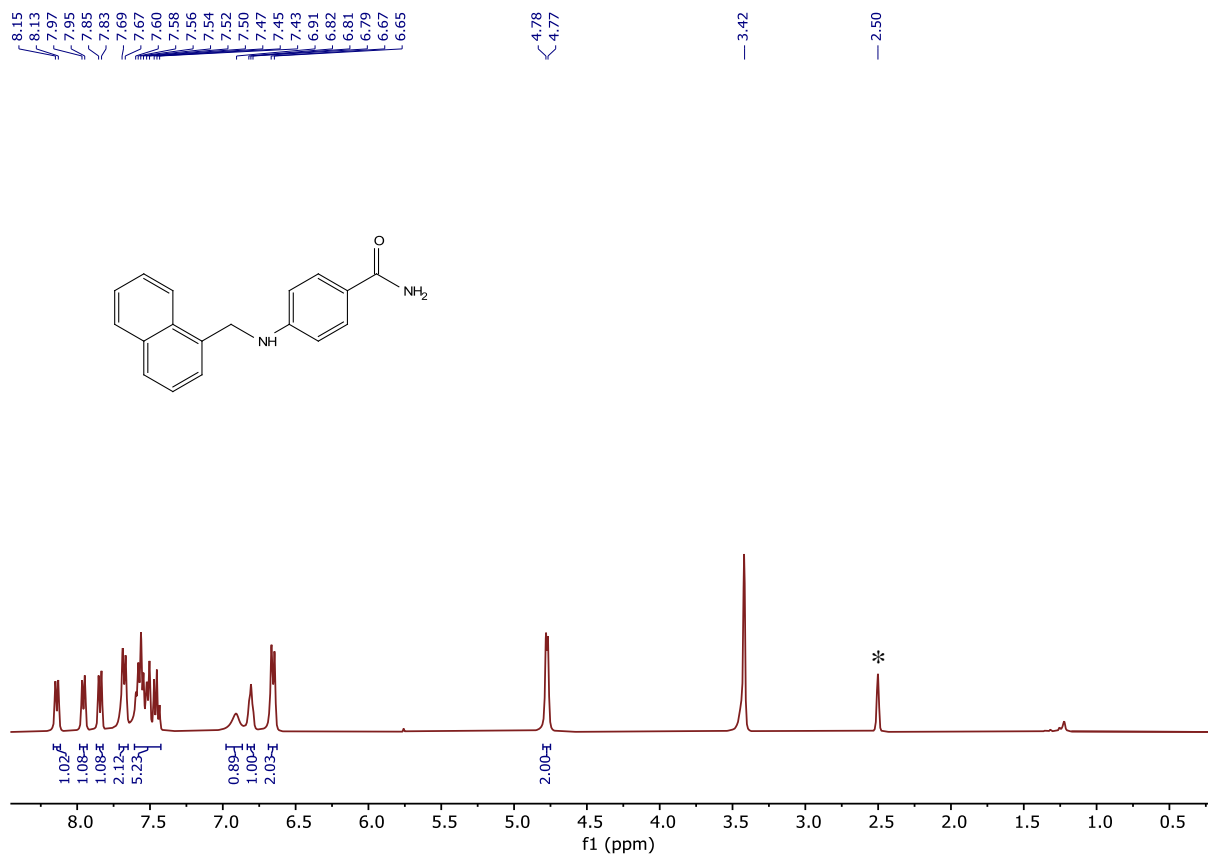

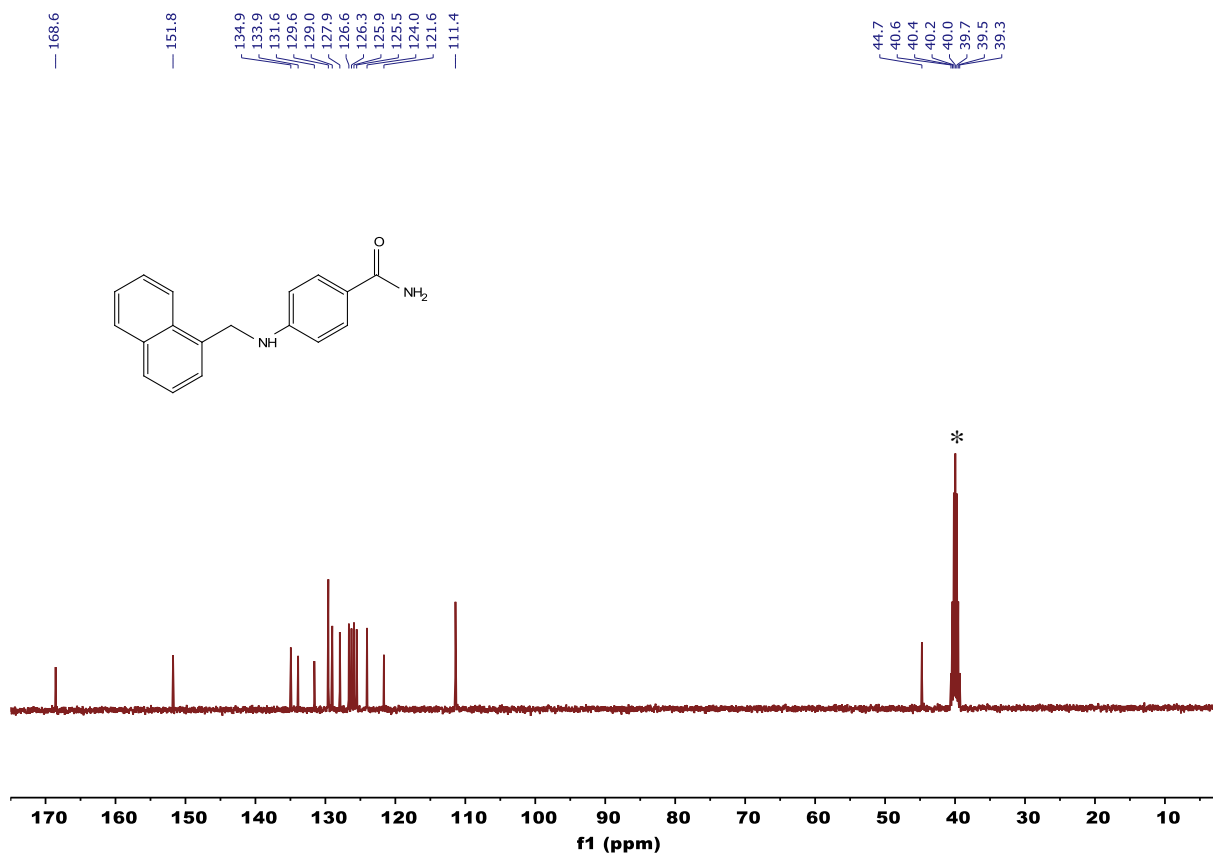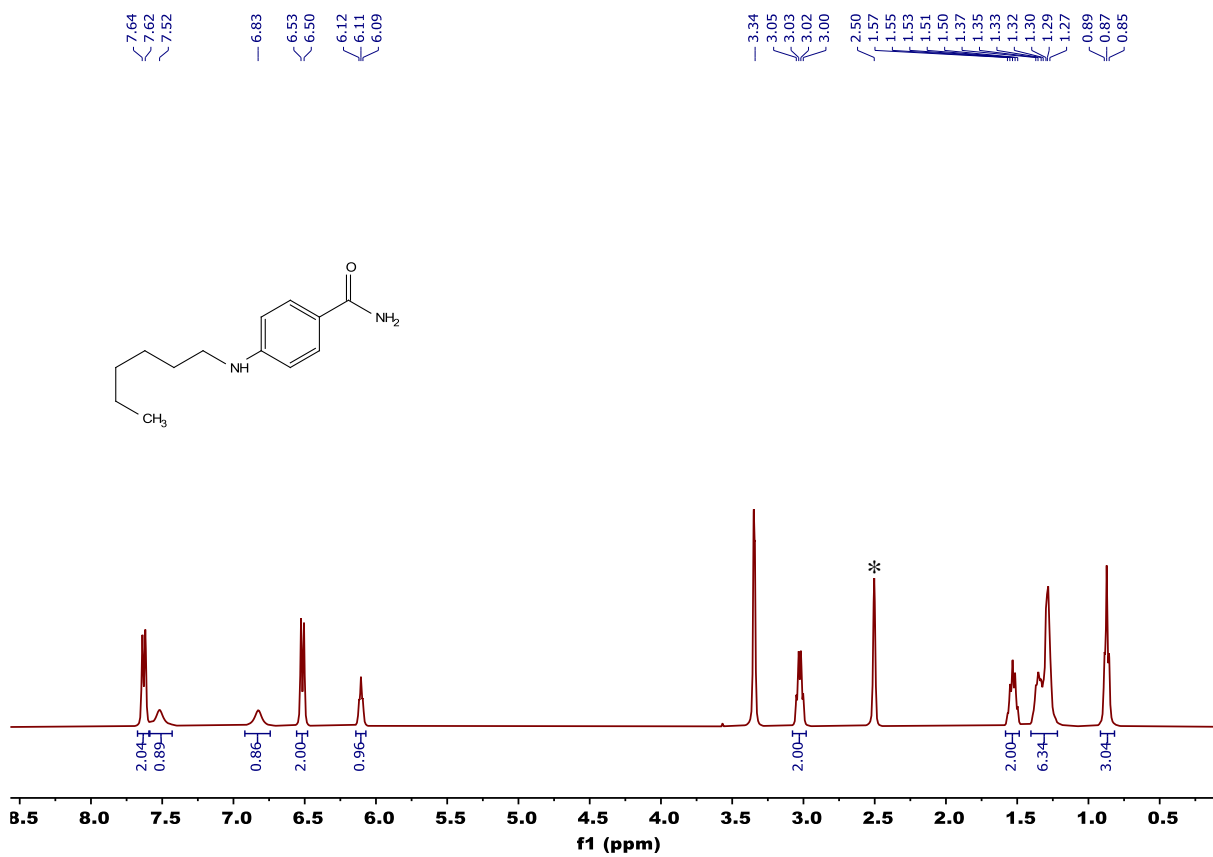

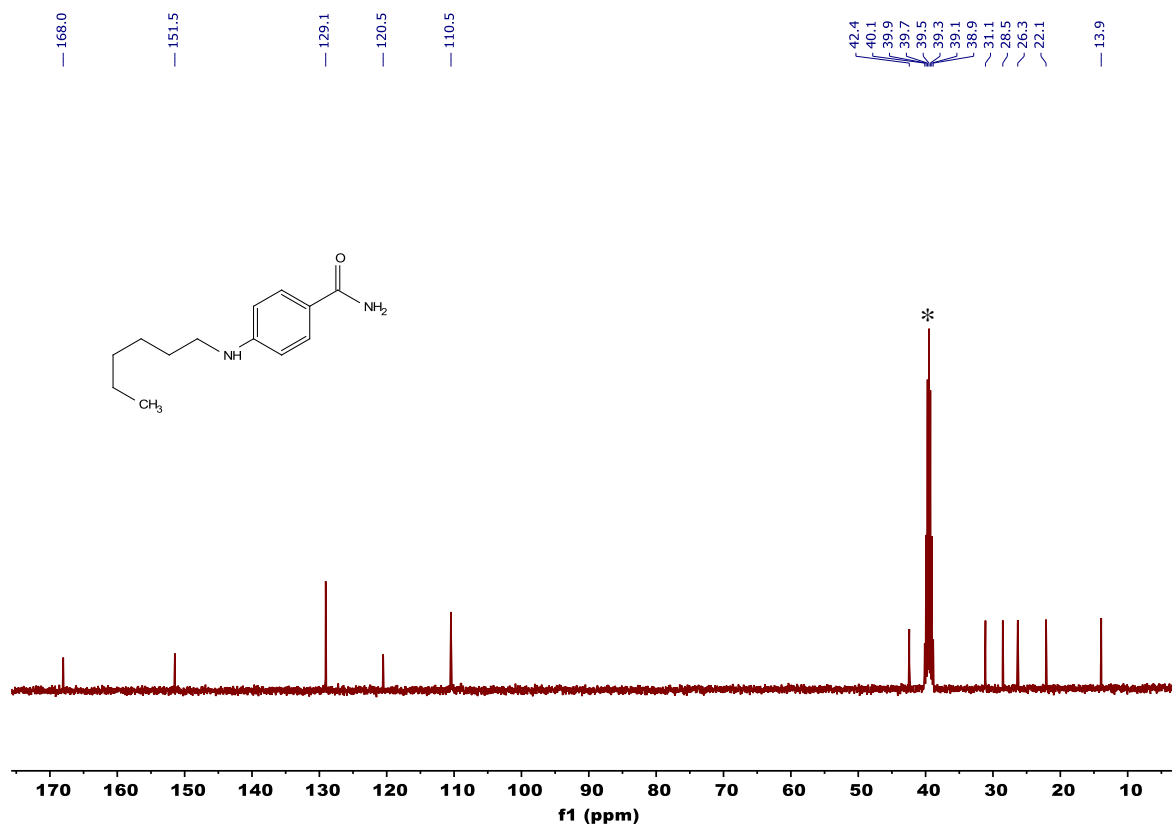

$^1\text{H}$  and  $^{13}\text{C}\{^1\text{H}\}$  NMR spectra of isolated compounds 7a-7n in  $\text{CDCl}_3$  (\*) from catalytic reactions

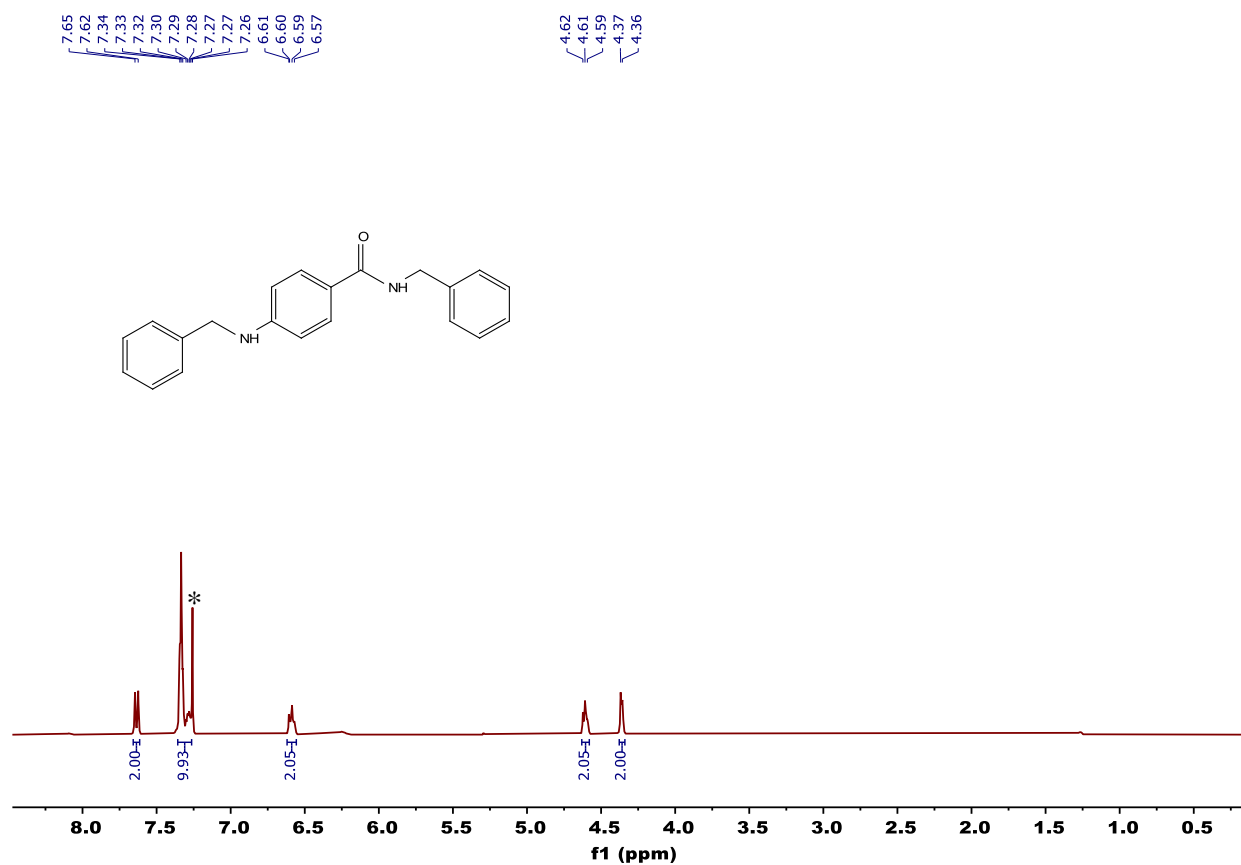

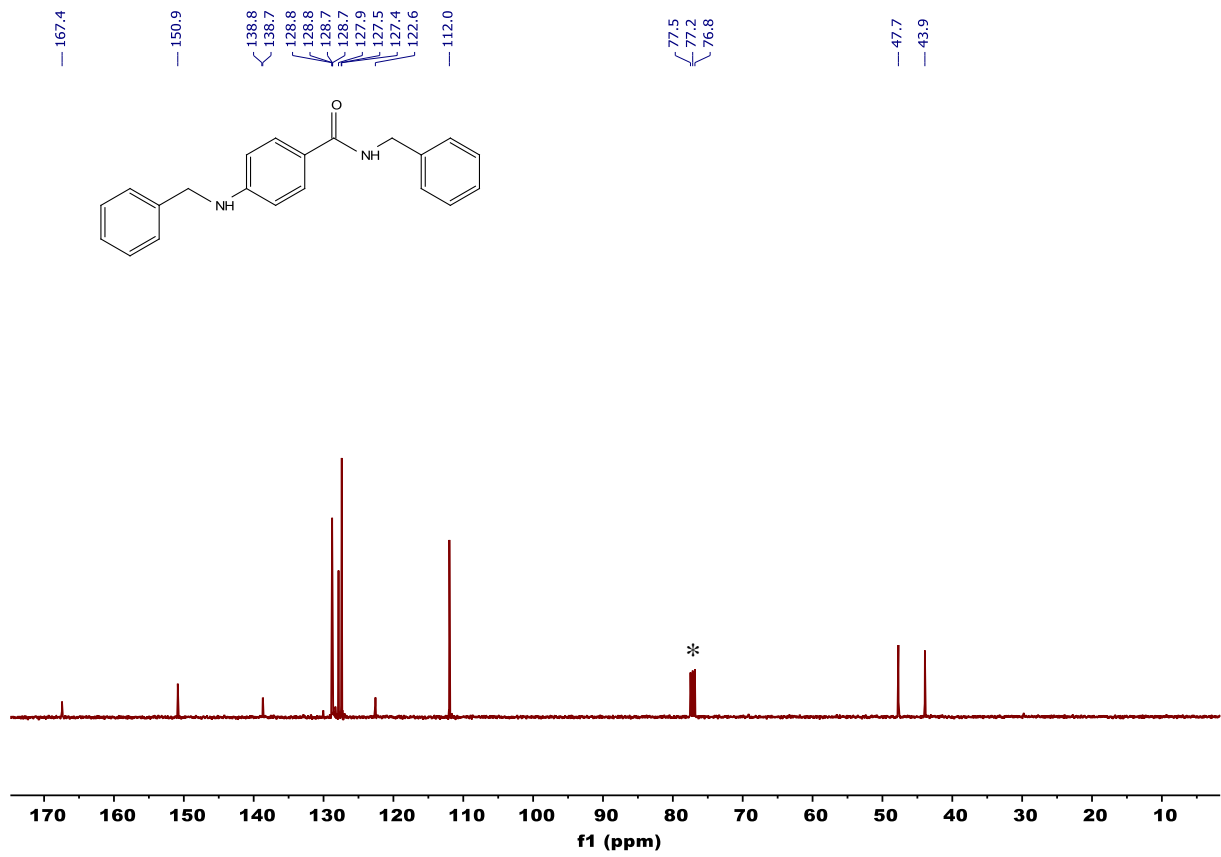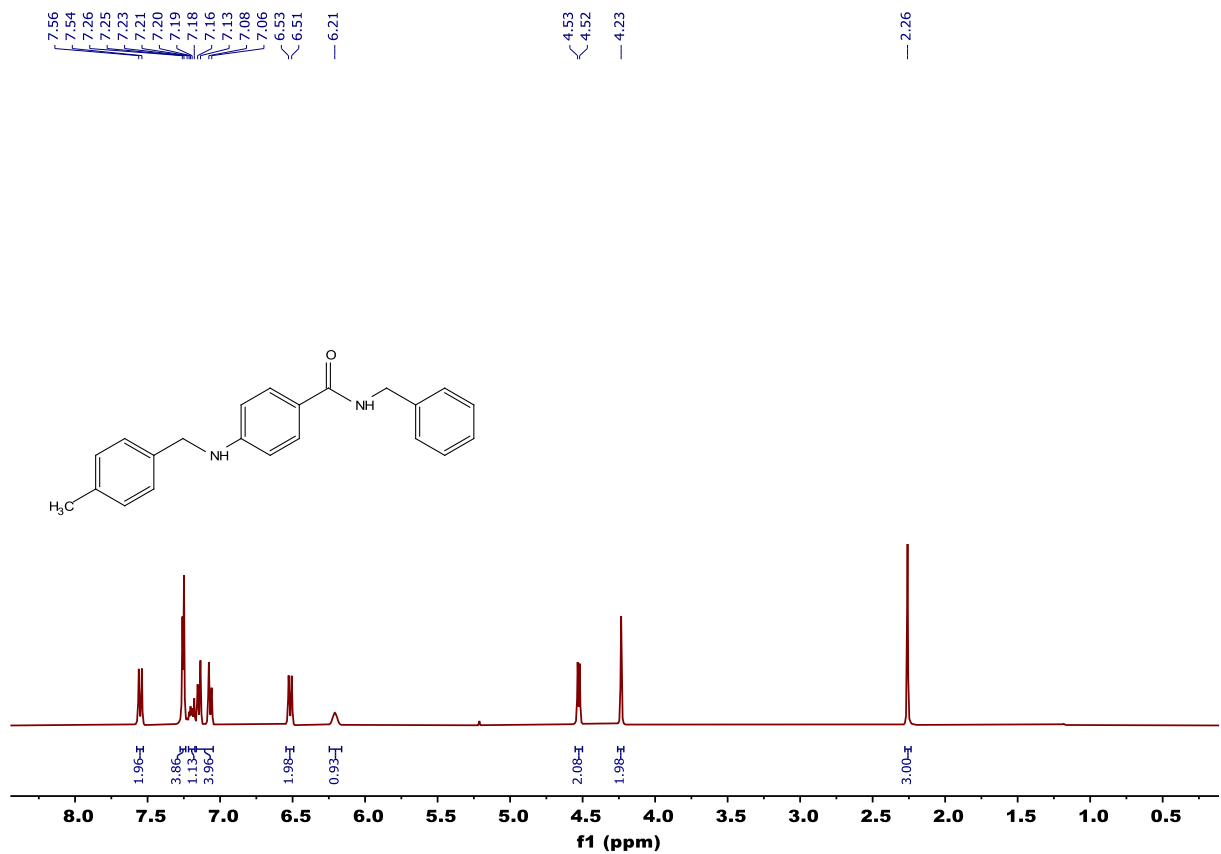

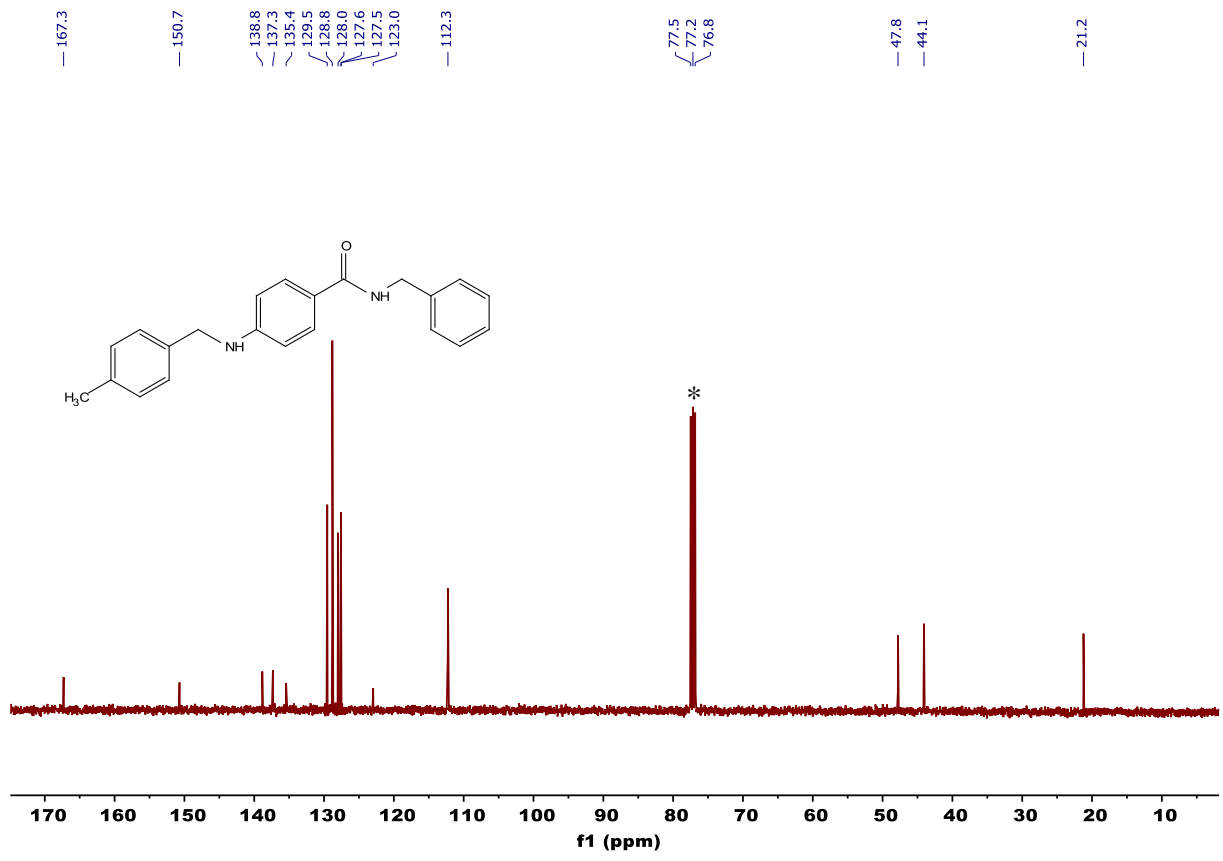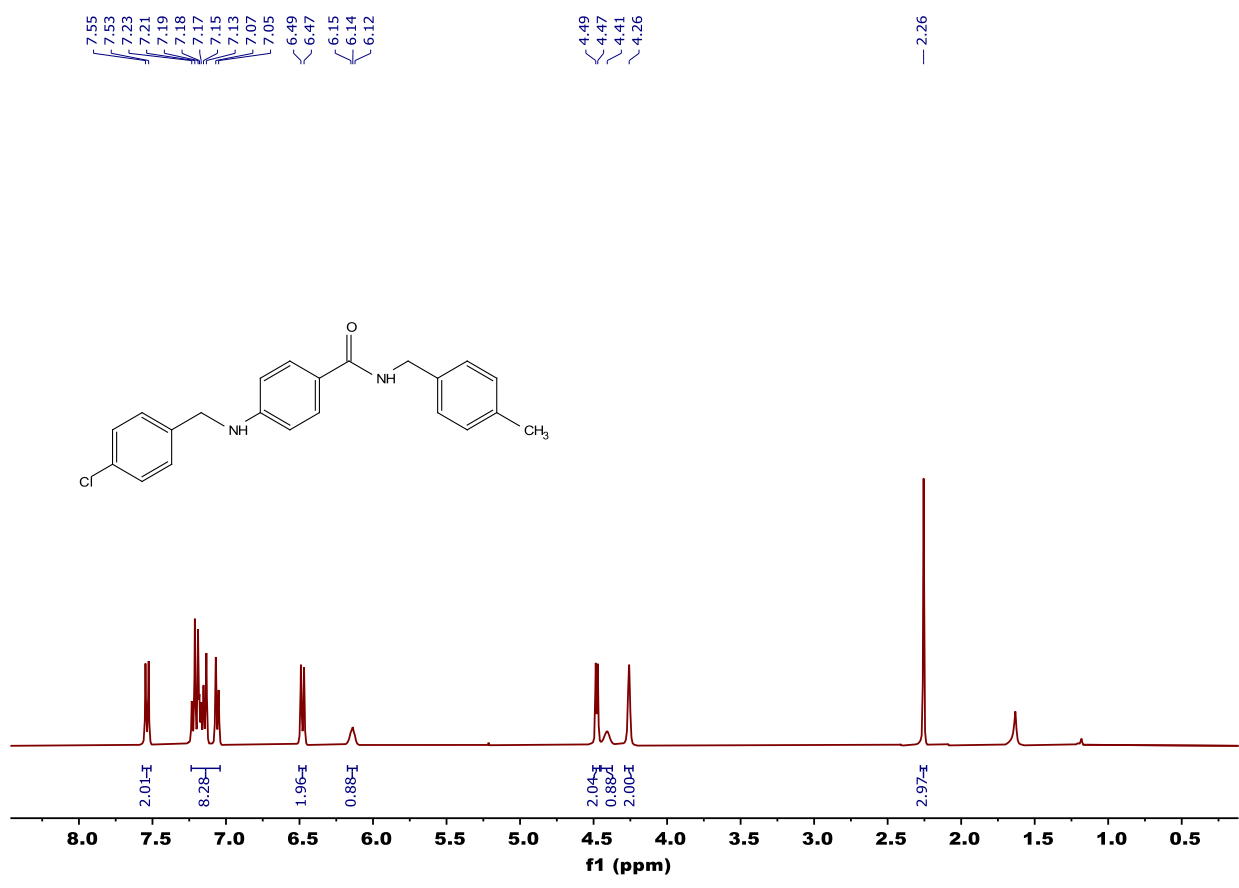

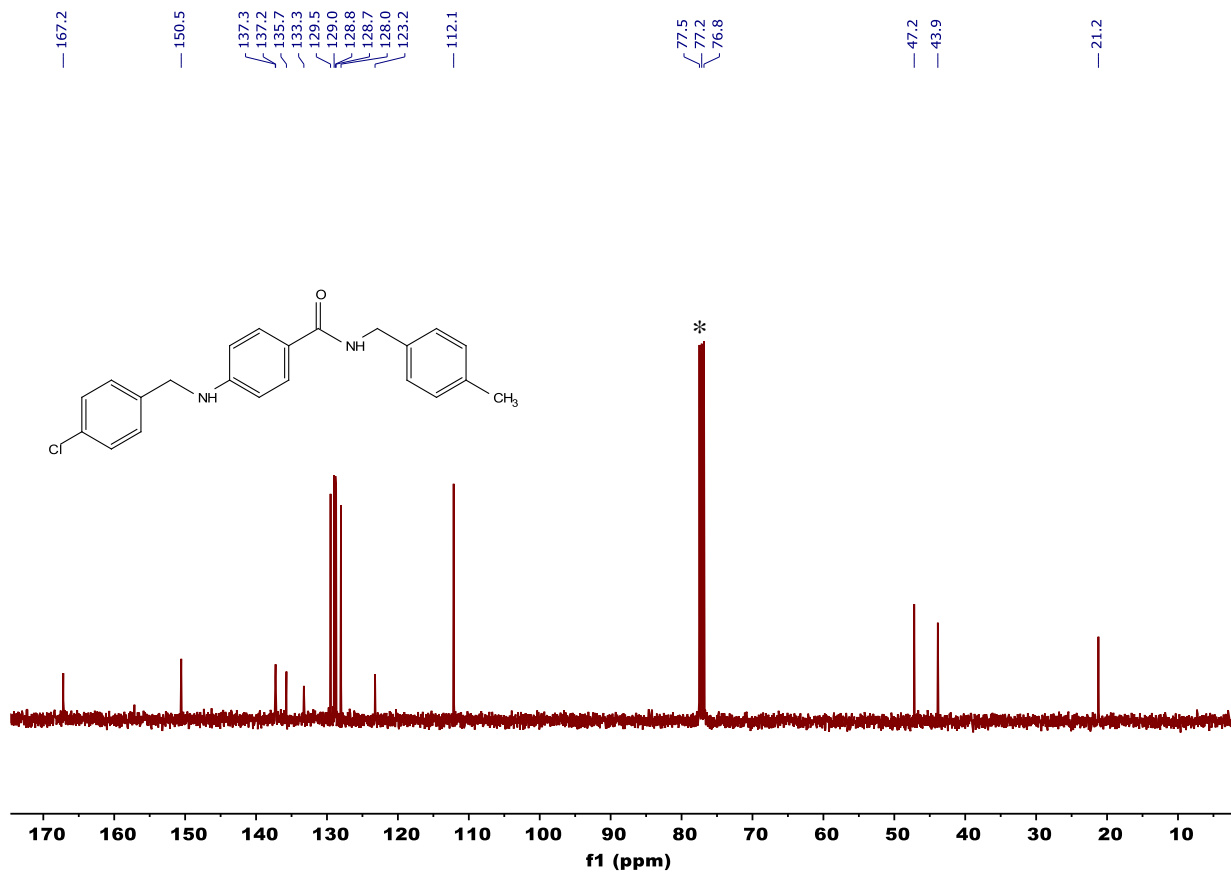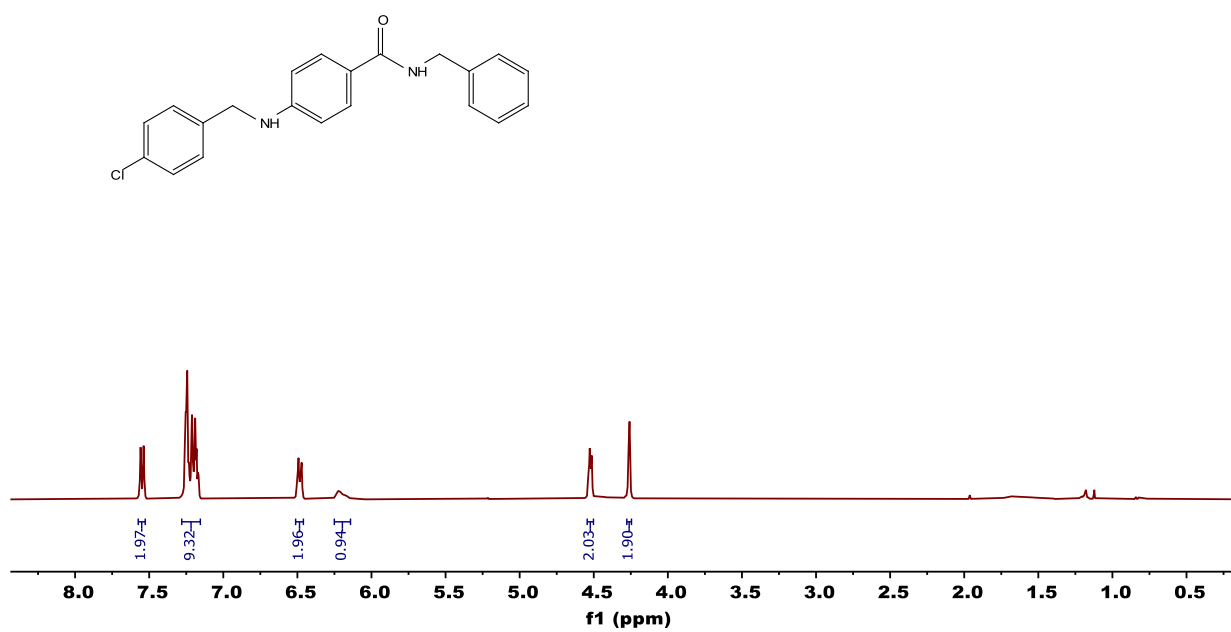

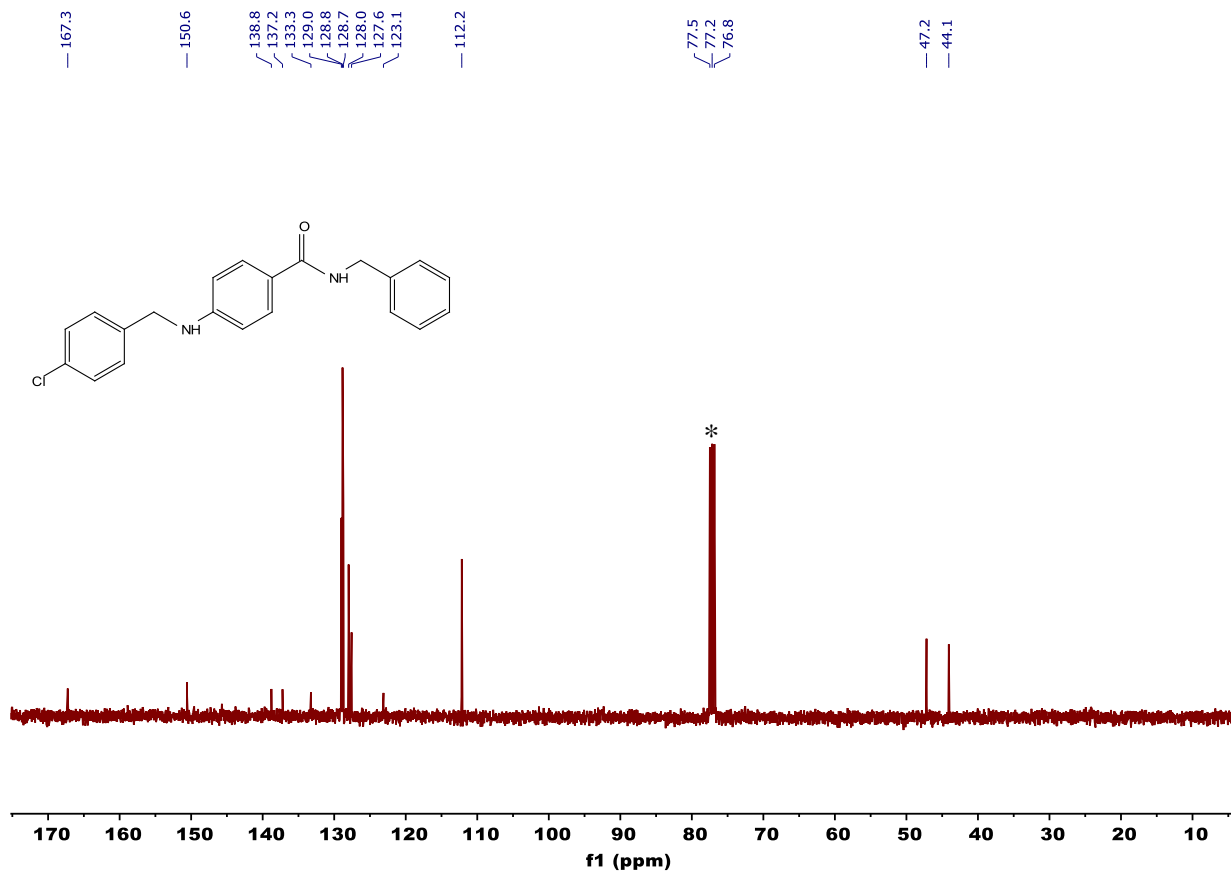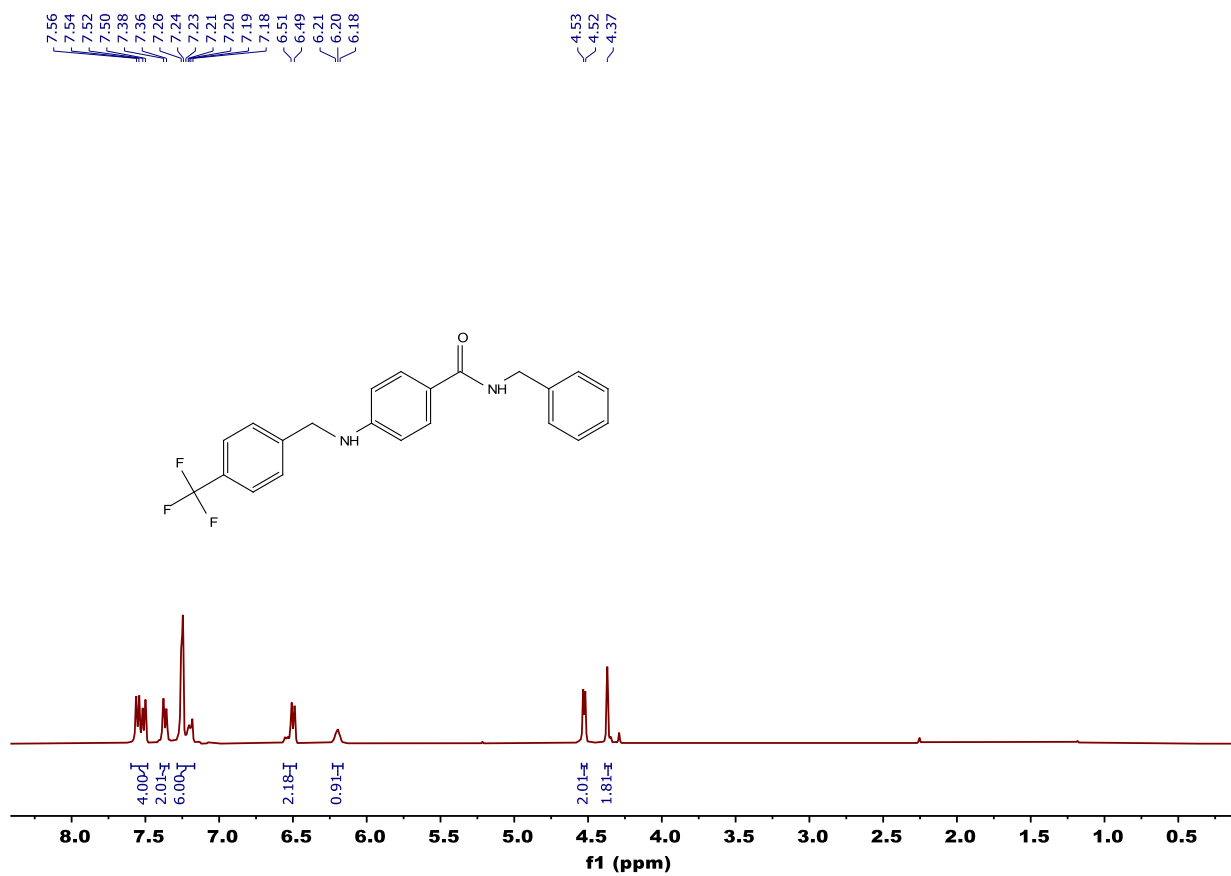

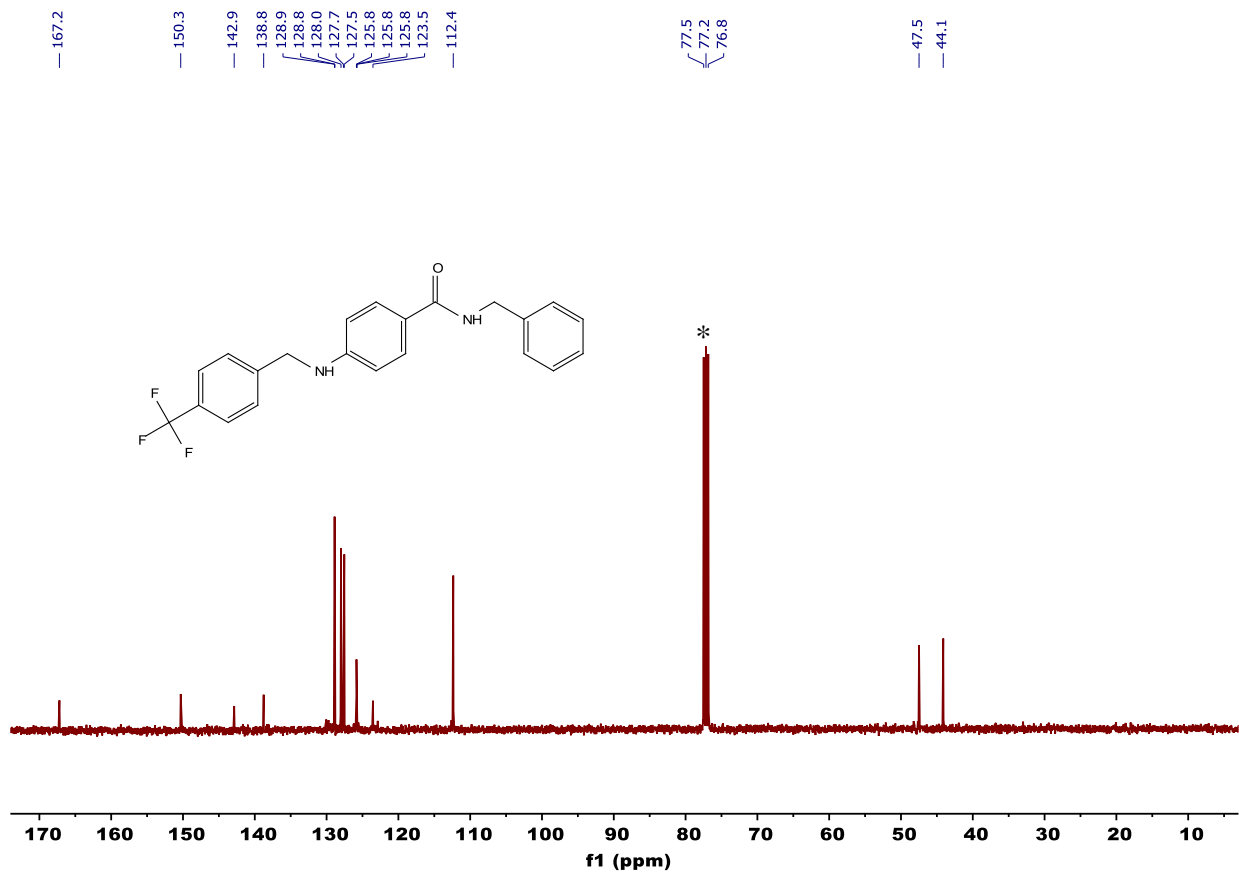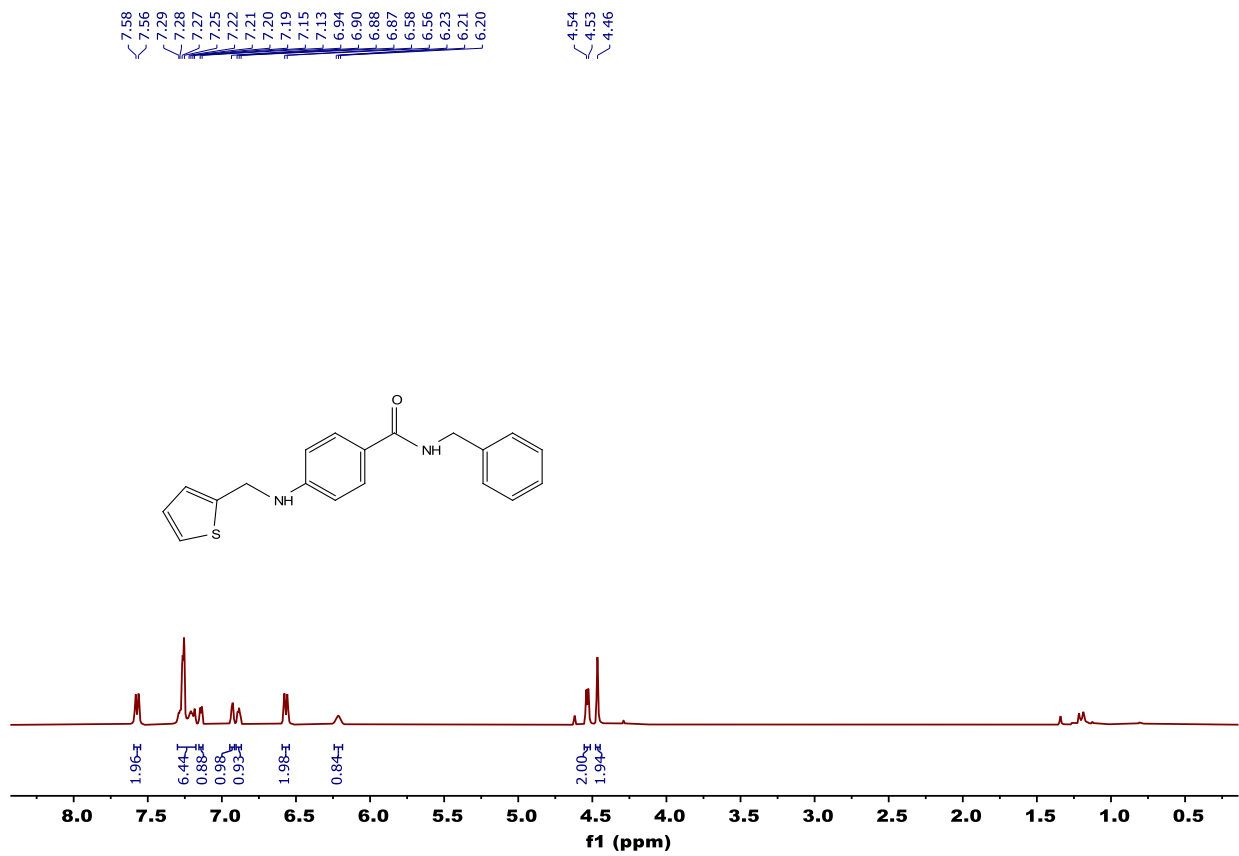



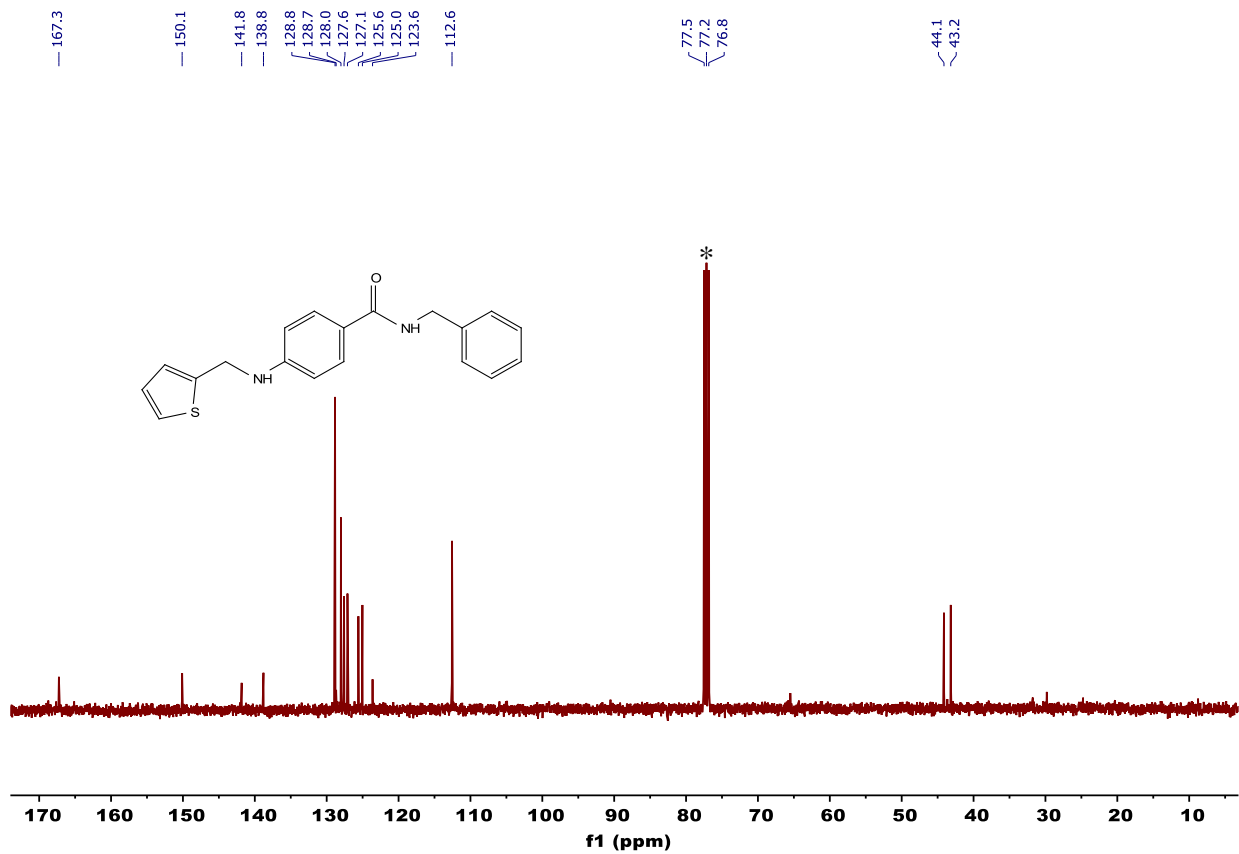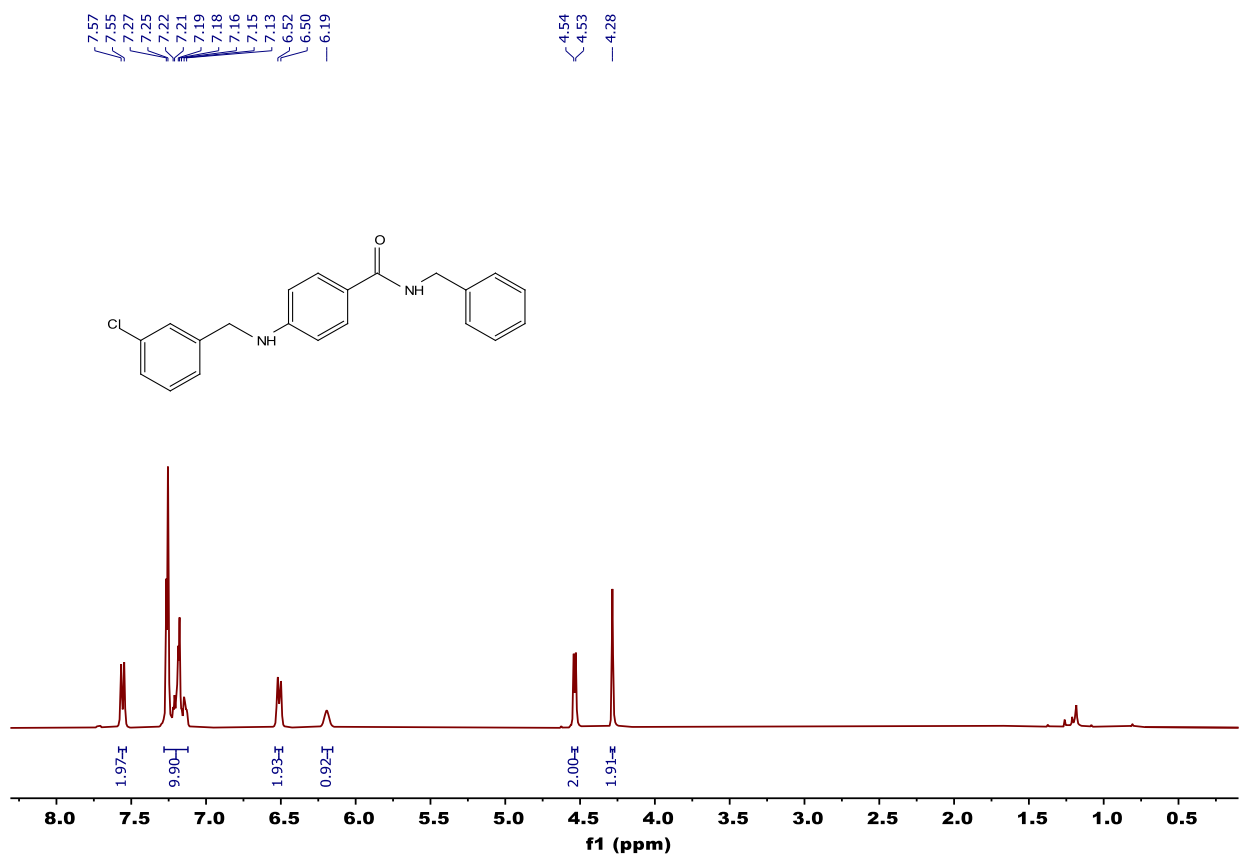

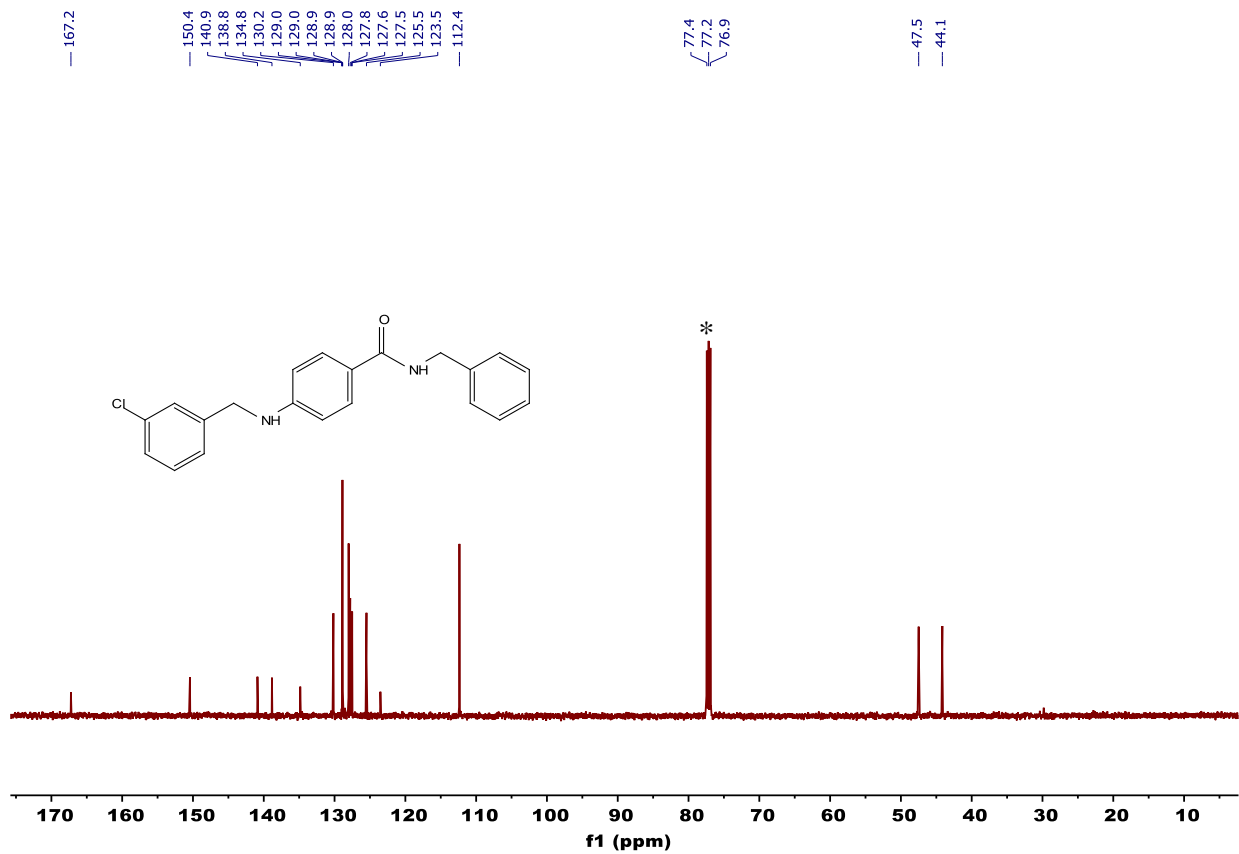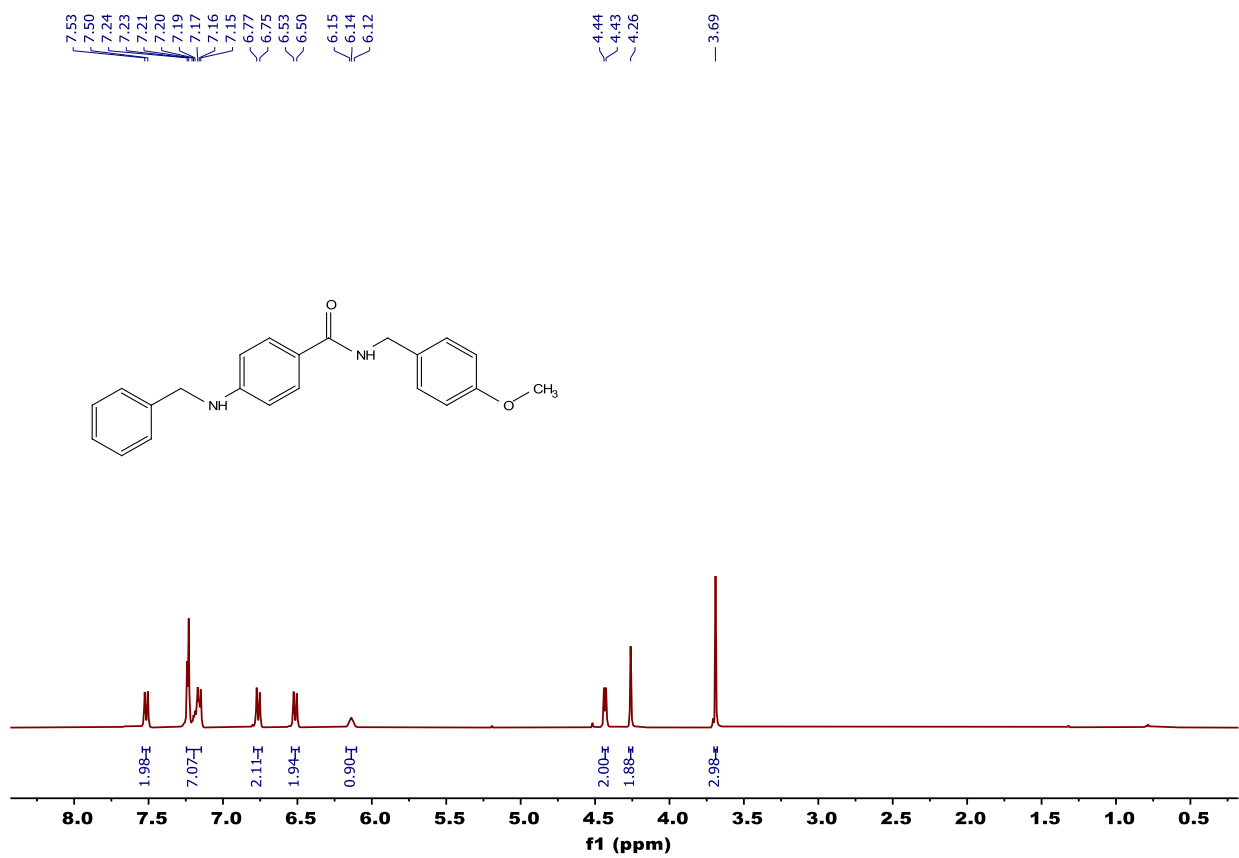

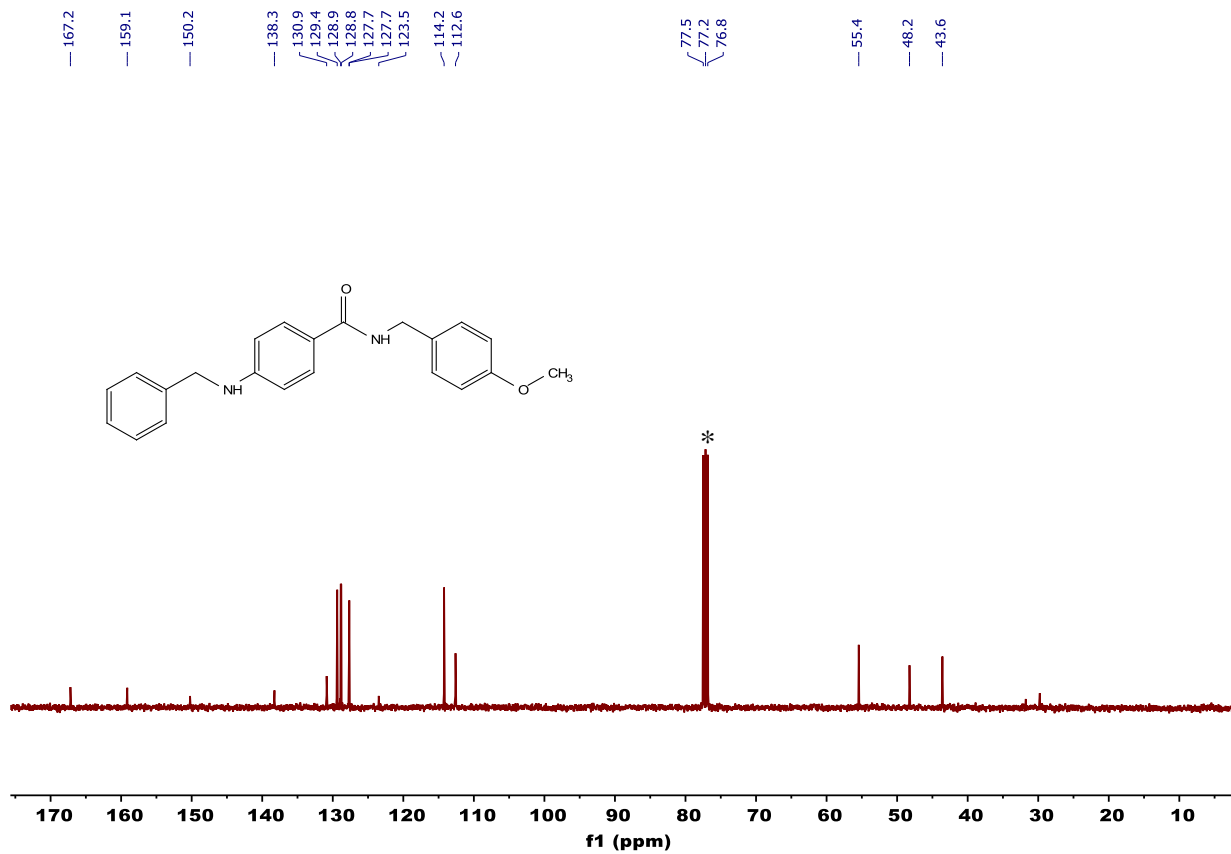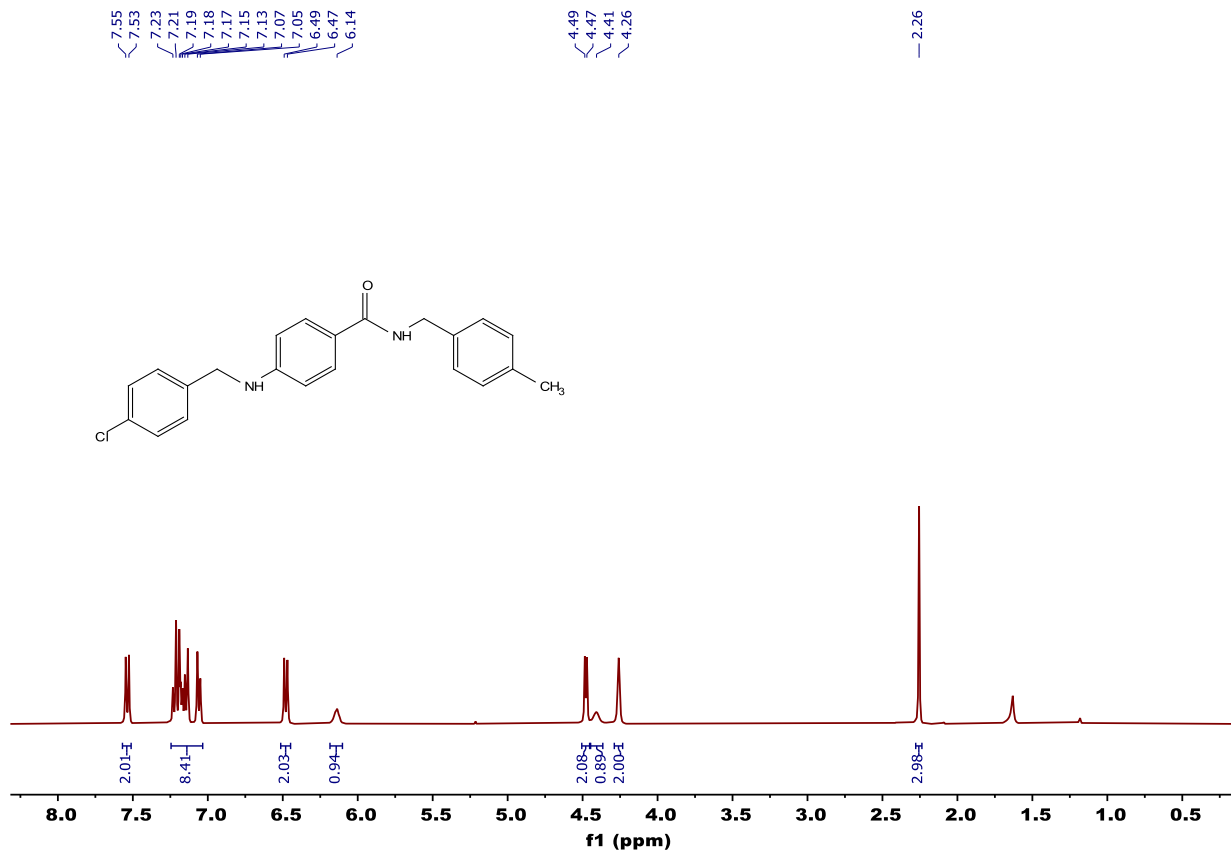

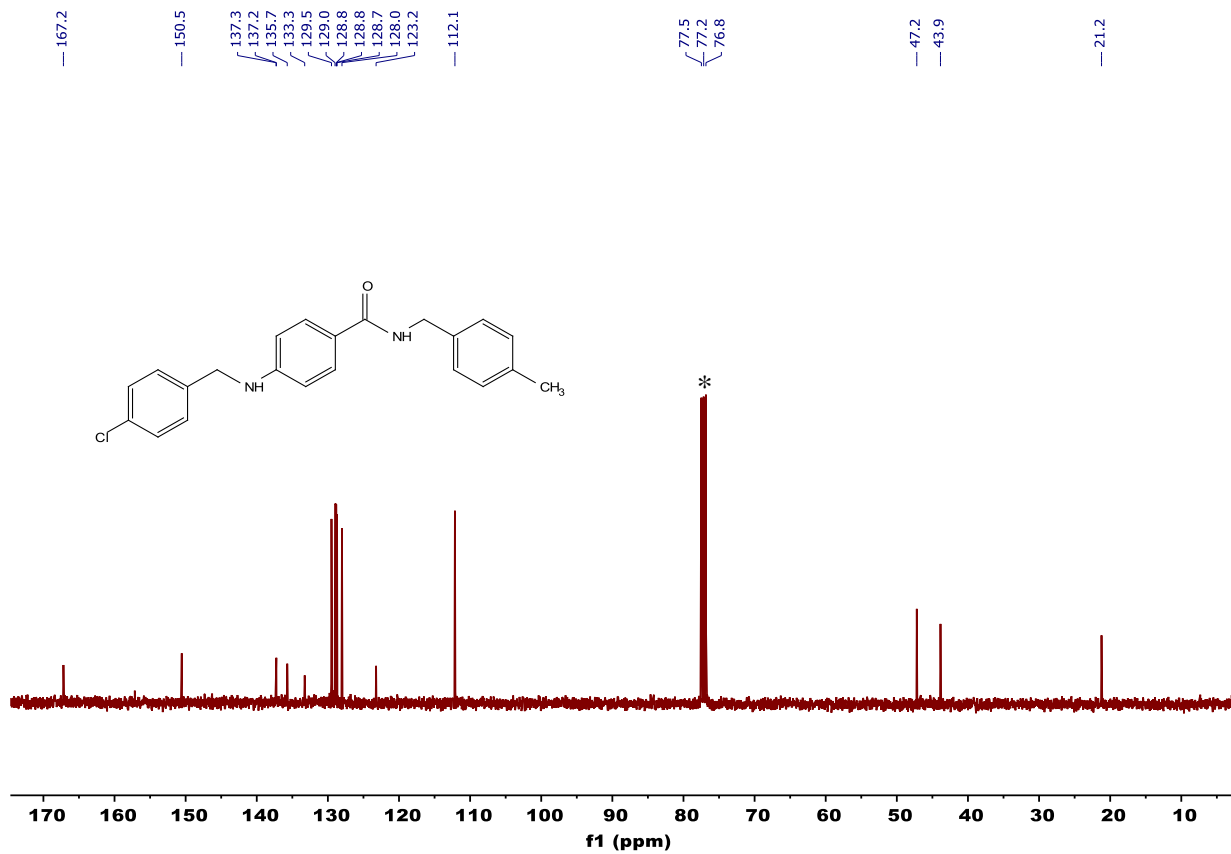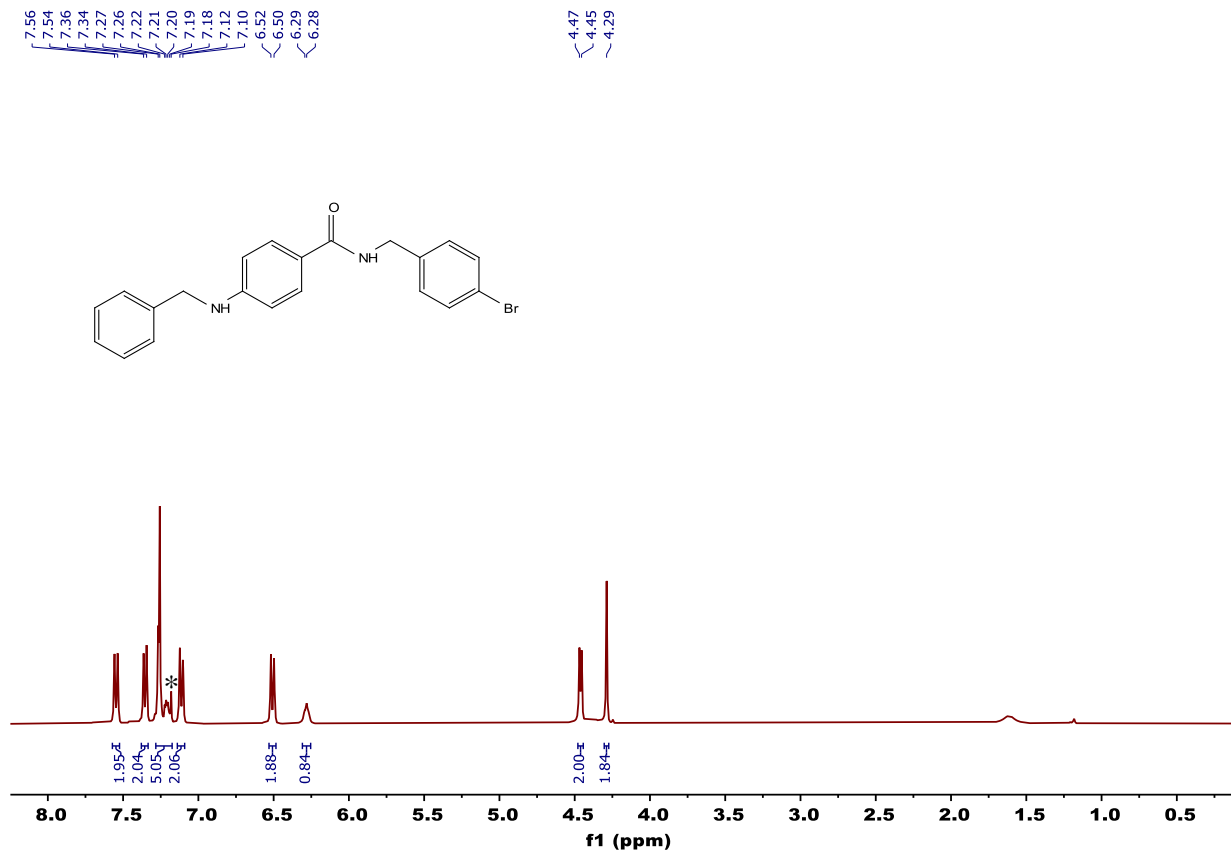

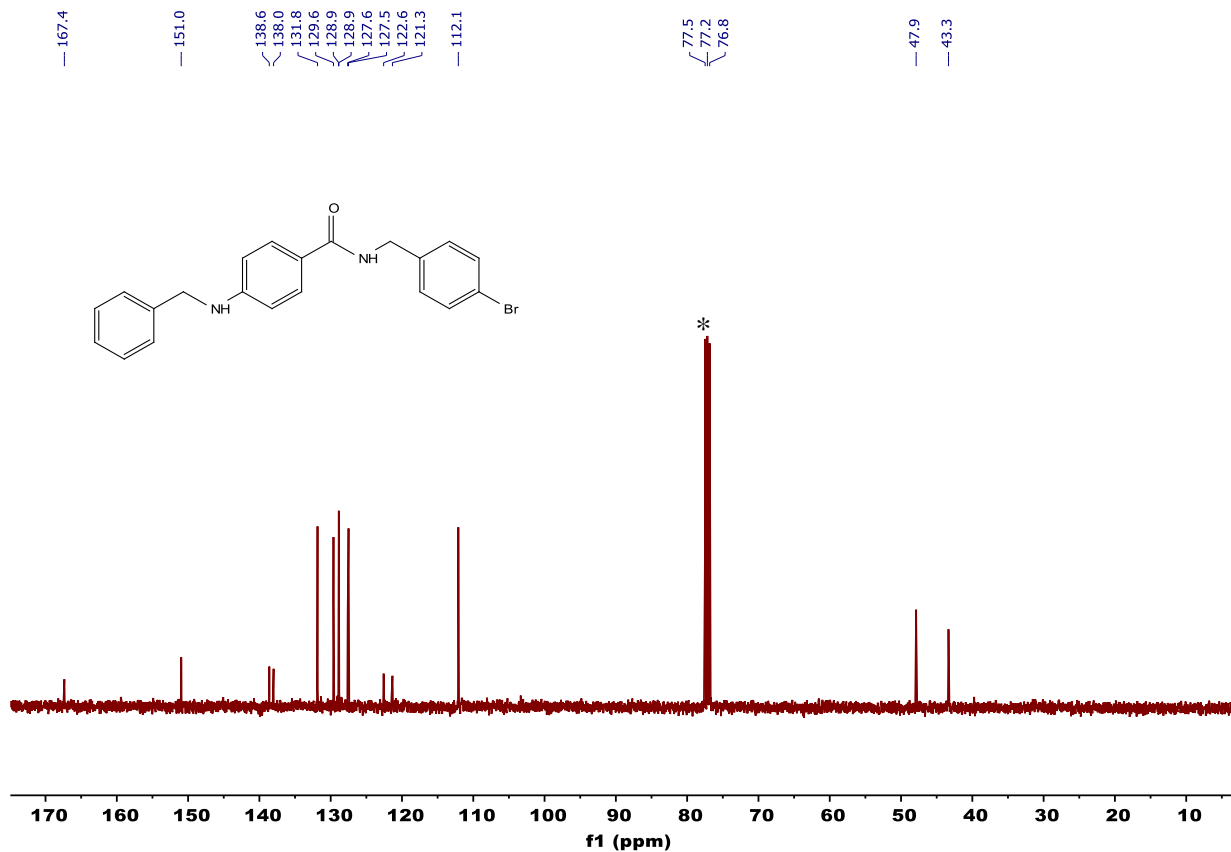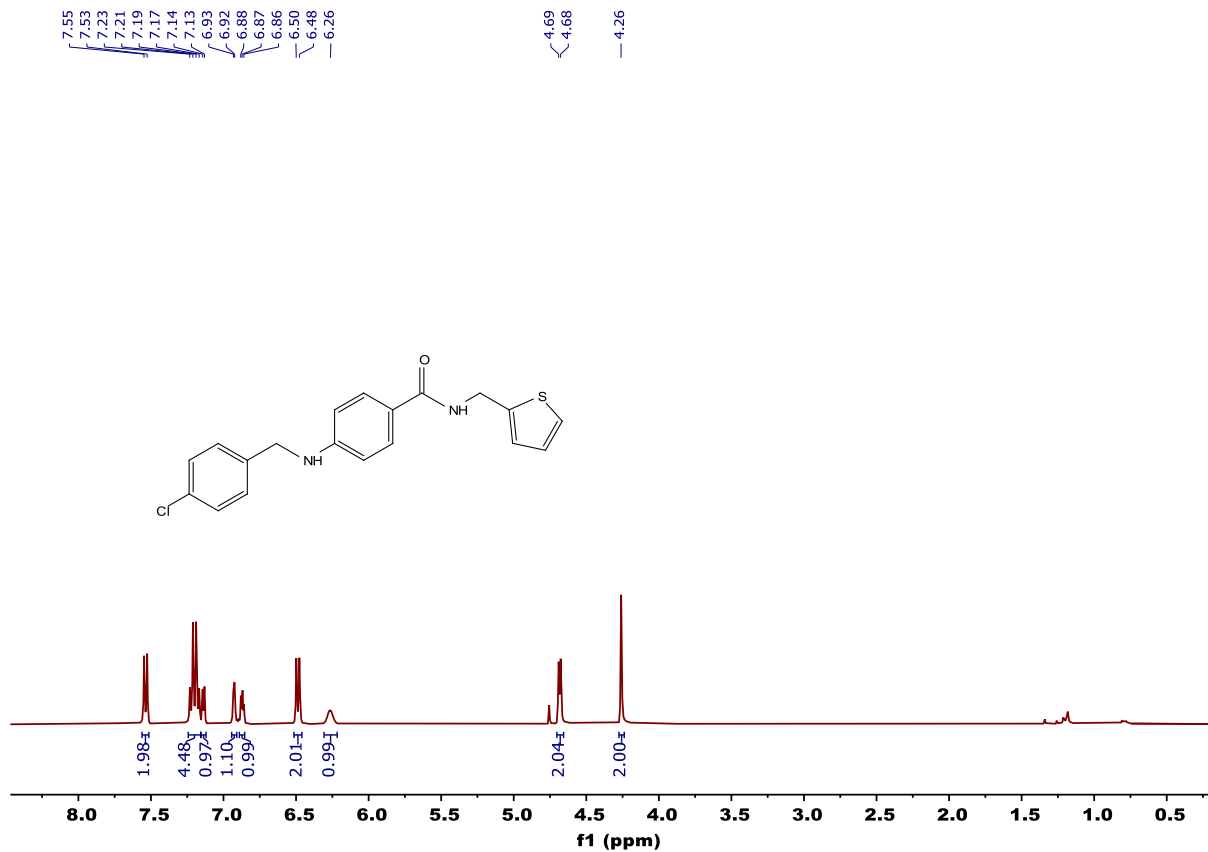

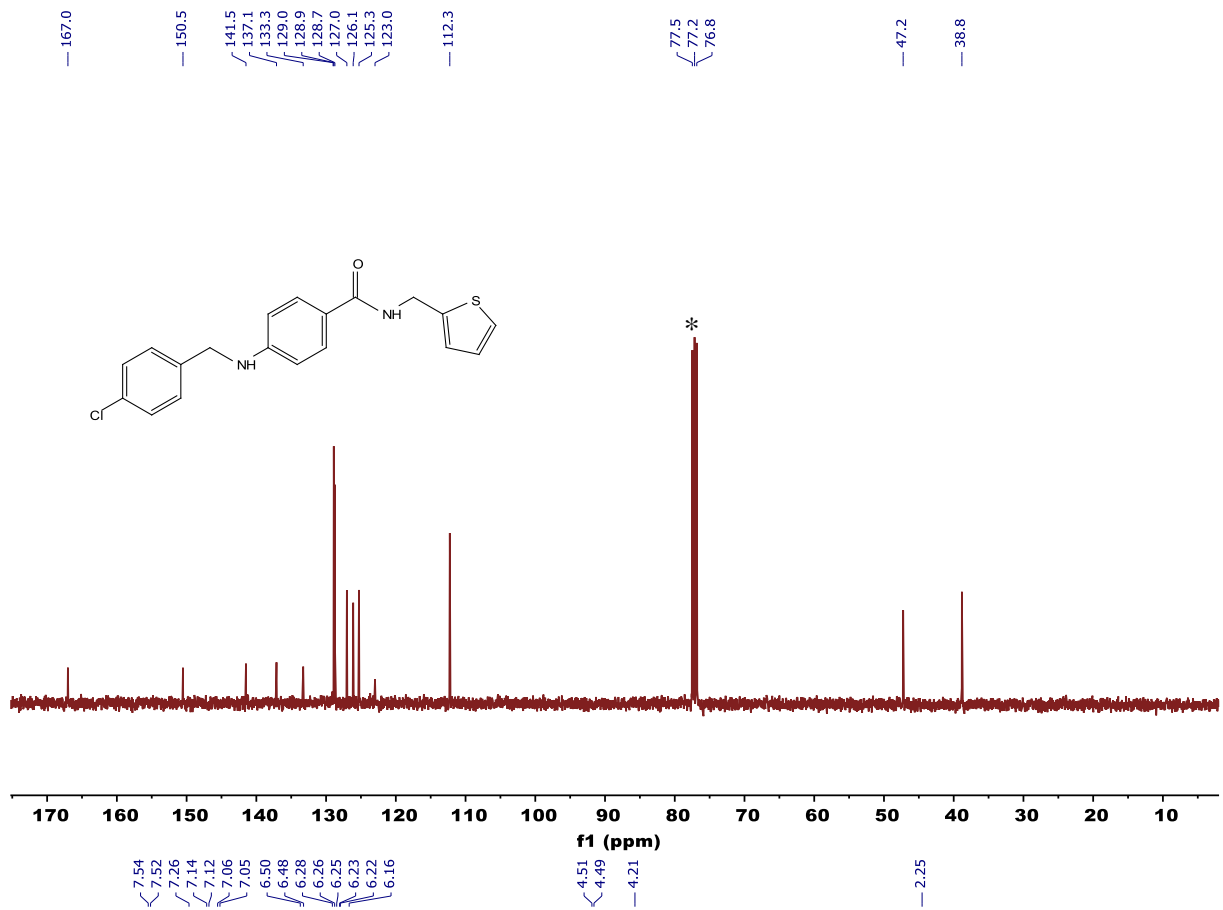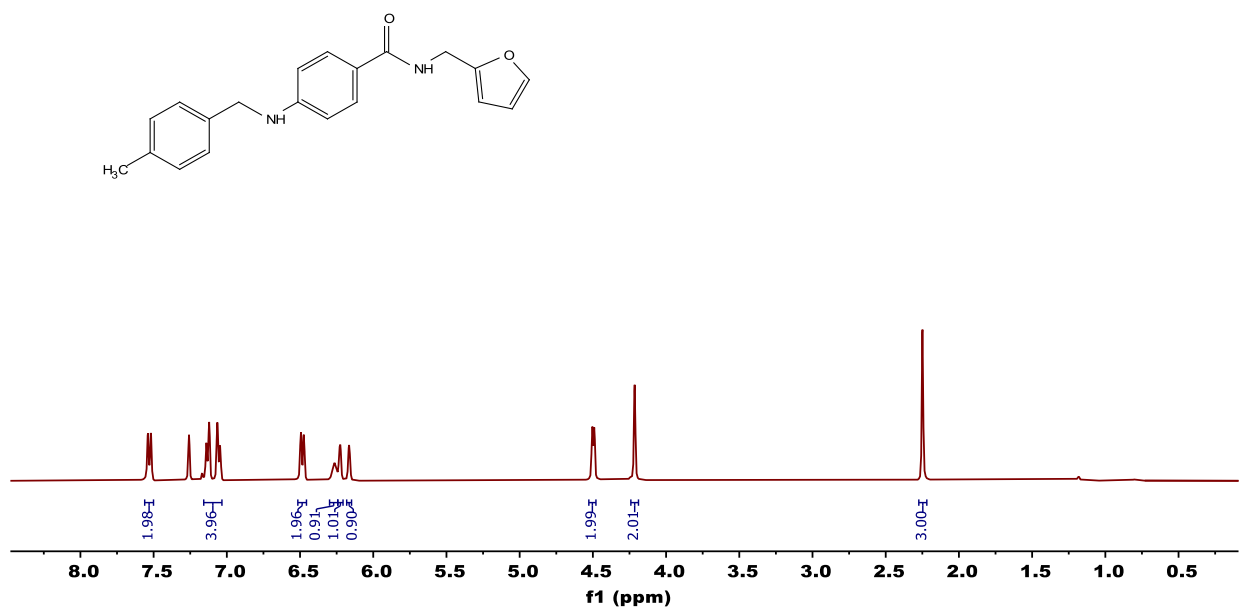

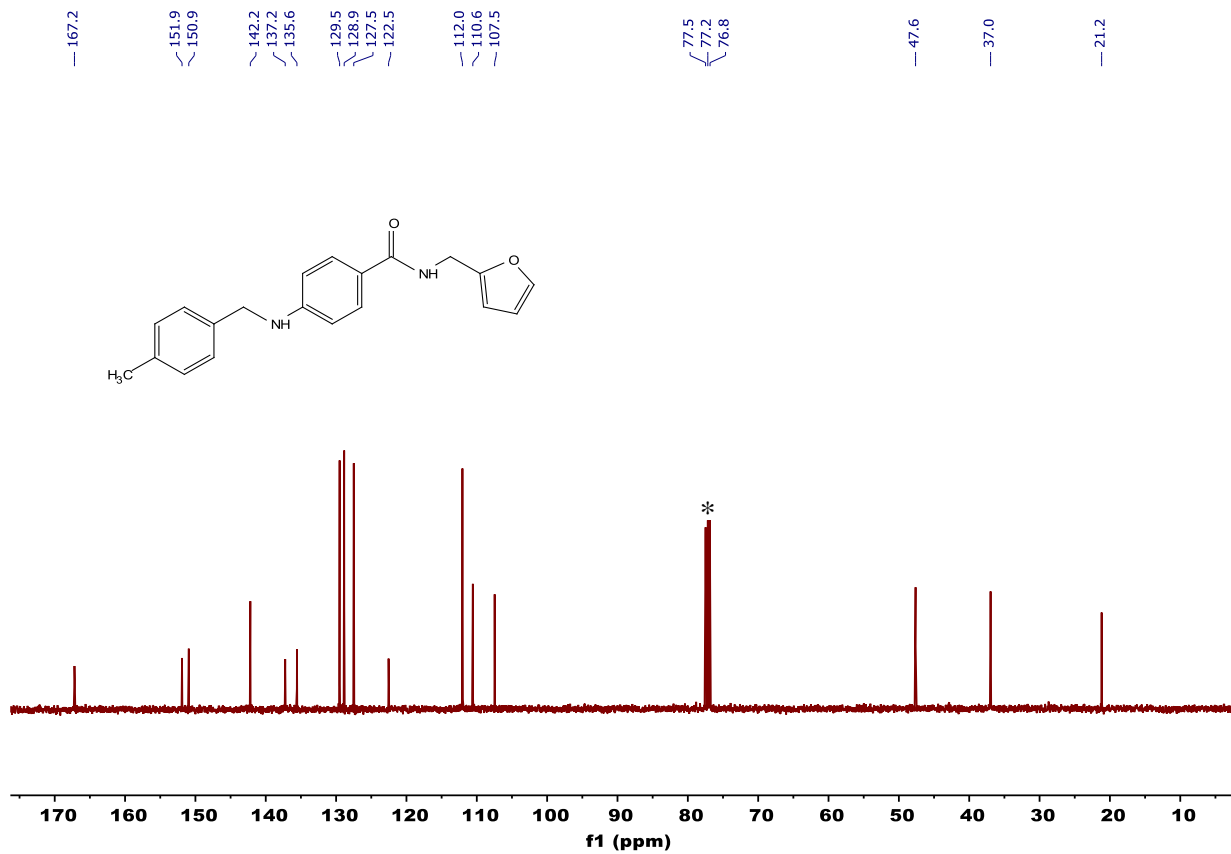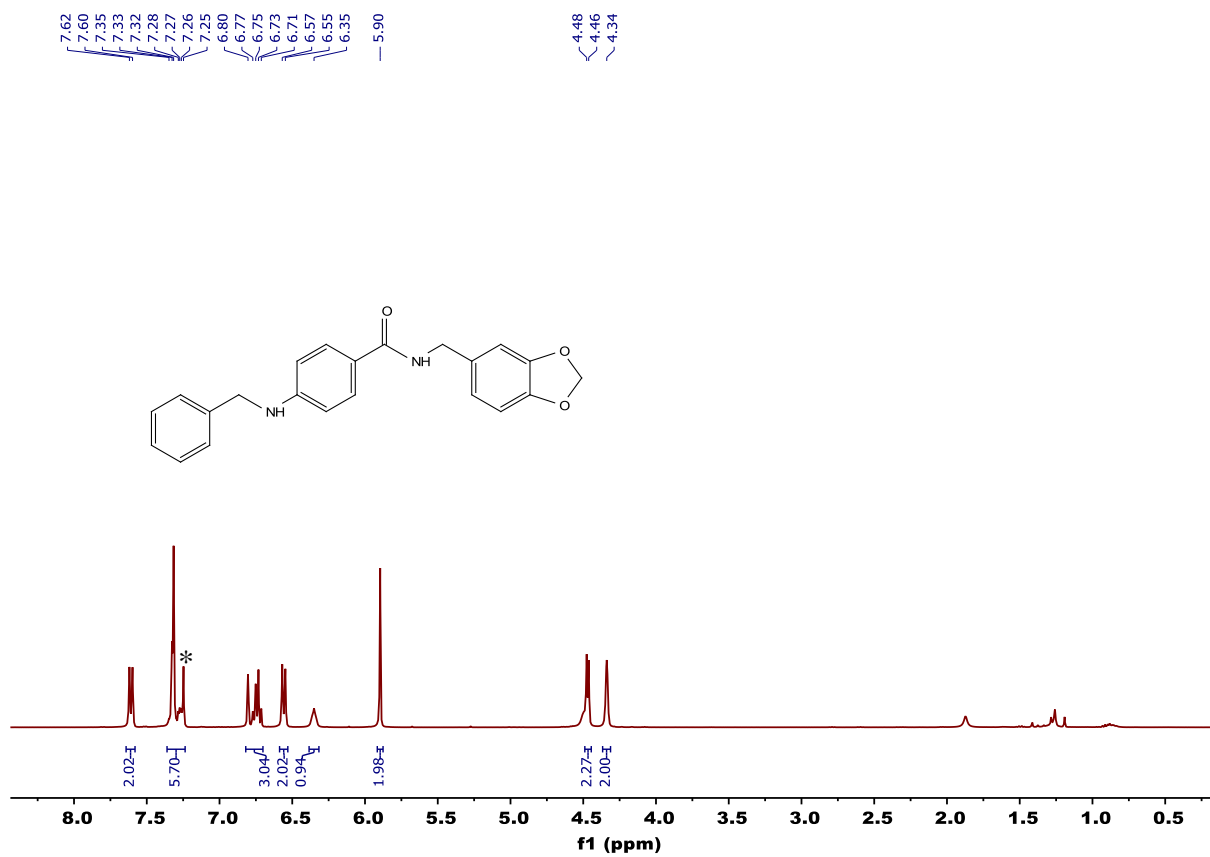

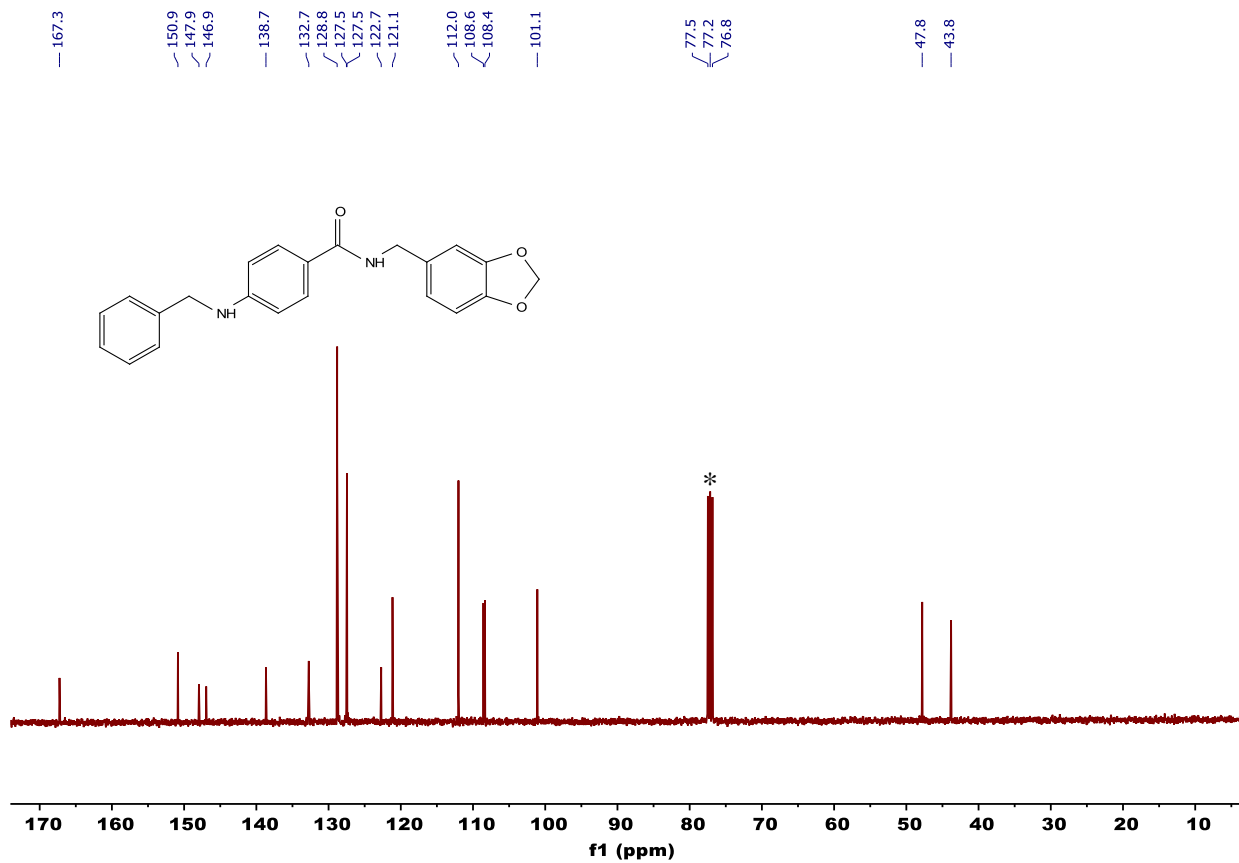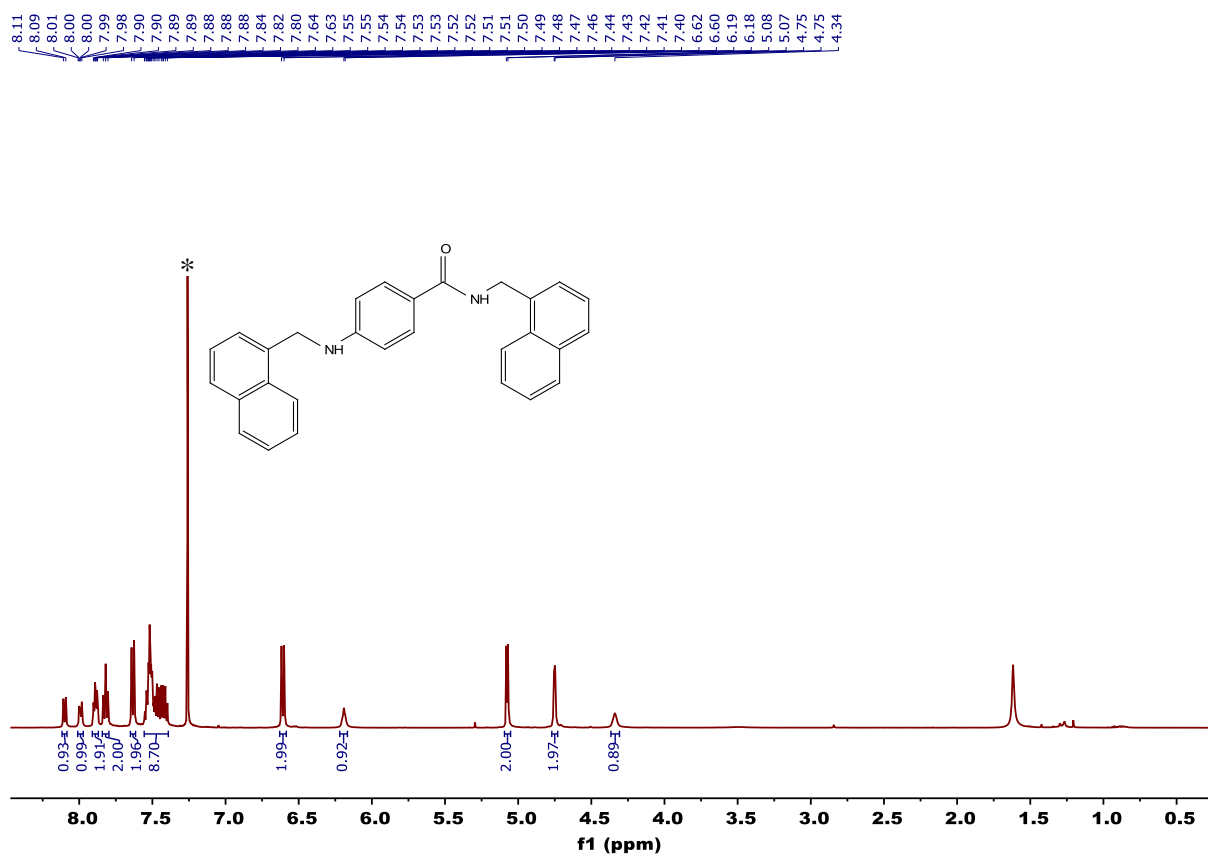



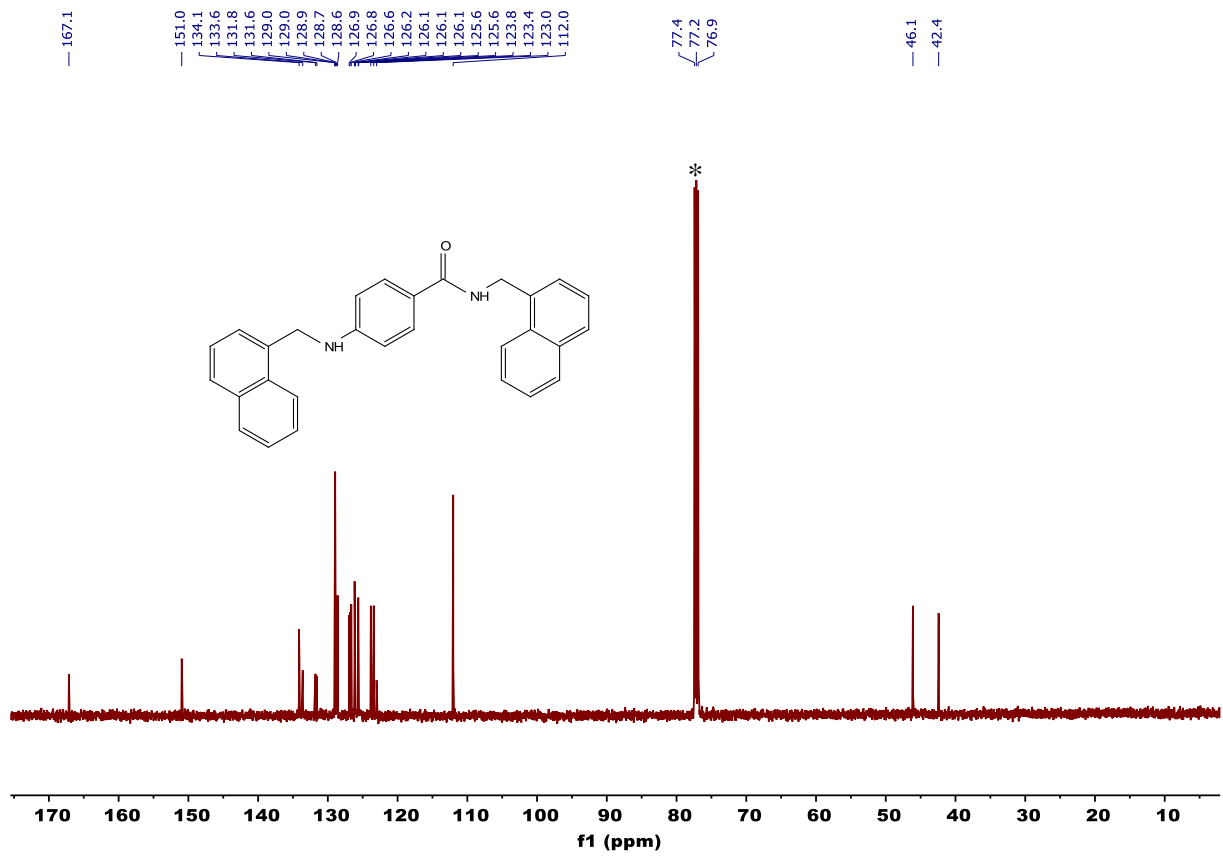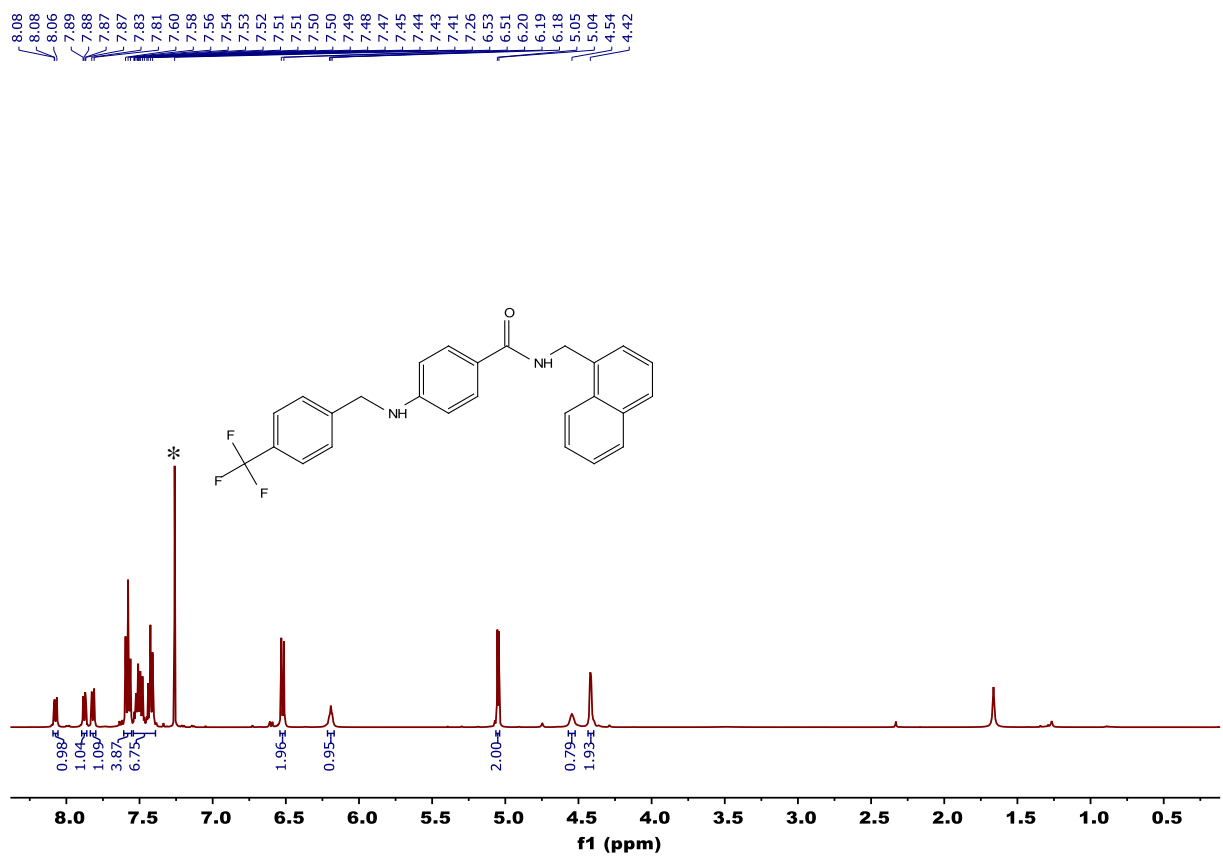

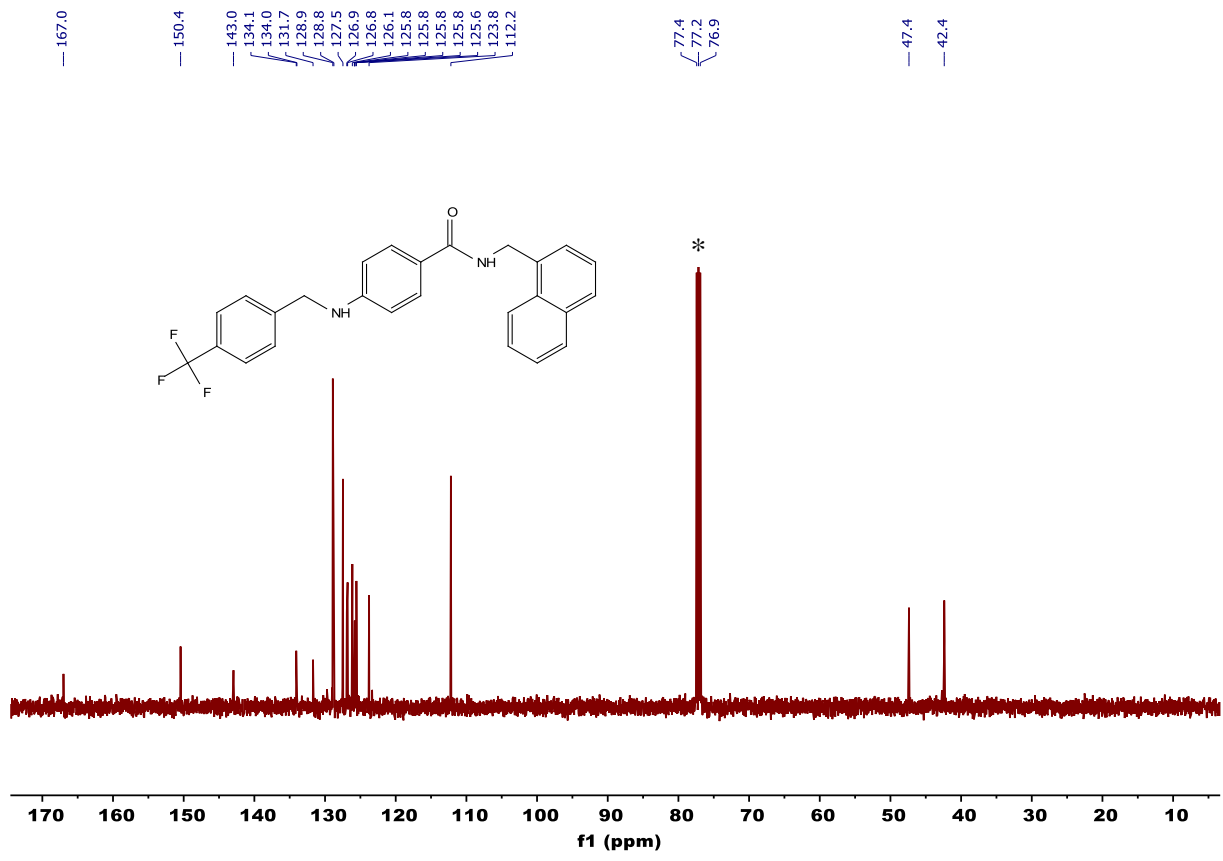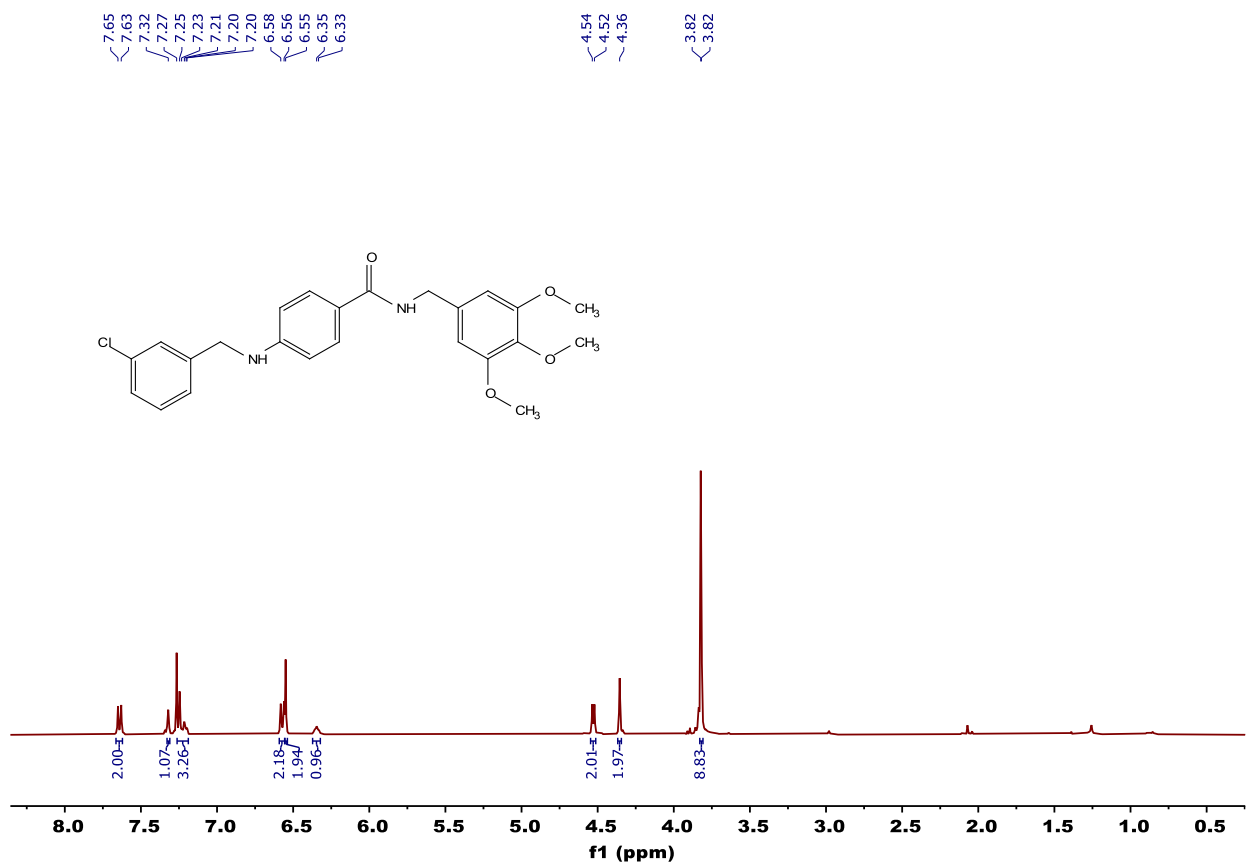

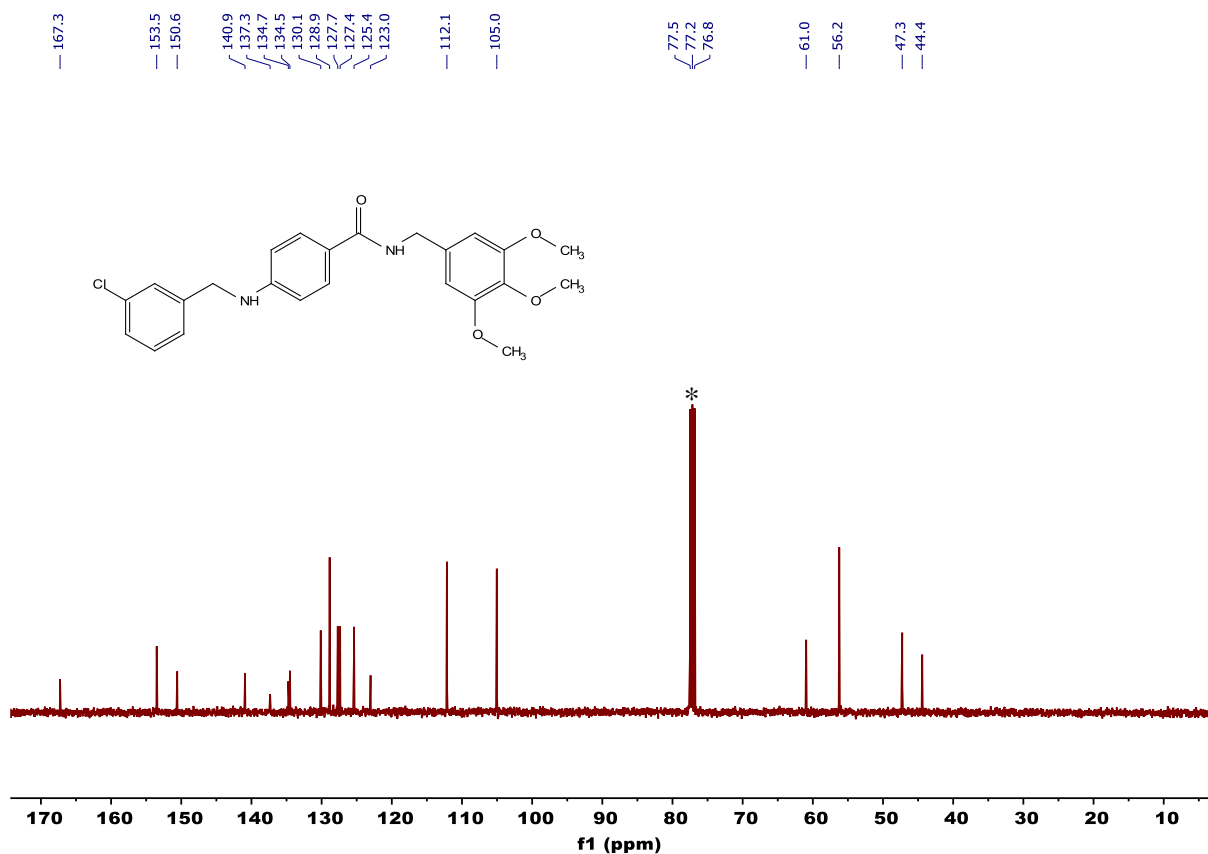

**General procedure for deuterium labelling experiment.** An oven dried Schlenk tube was charged with the catalyst (**2c**) stock solution (0.2 mol%), prepared in  $\text{CH}_3\text{CN}$  and then the volatiles were removed in vacuum. To this, dppe (0.8 mol%), benzamide (0.5 mmol), benzyl alcohol- $d_2$  (1.0 mmol), and  $\text{KO}^t\text{Bu}$  (0.125 mmol) followed by *t*-amyl alcohol (1 mL) were added. The reaction tube was then kept in oil bath (bath temperature 130 °C) and heated for the 24 h. After completion of the reaction, the pure products were isolated *via* column chromatography using hexane/ethyl acetate as eluent and deuterium incorporation was analysed from  $^1\text{H}$ -NMR analysis as shown below.

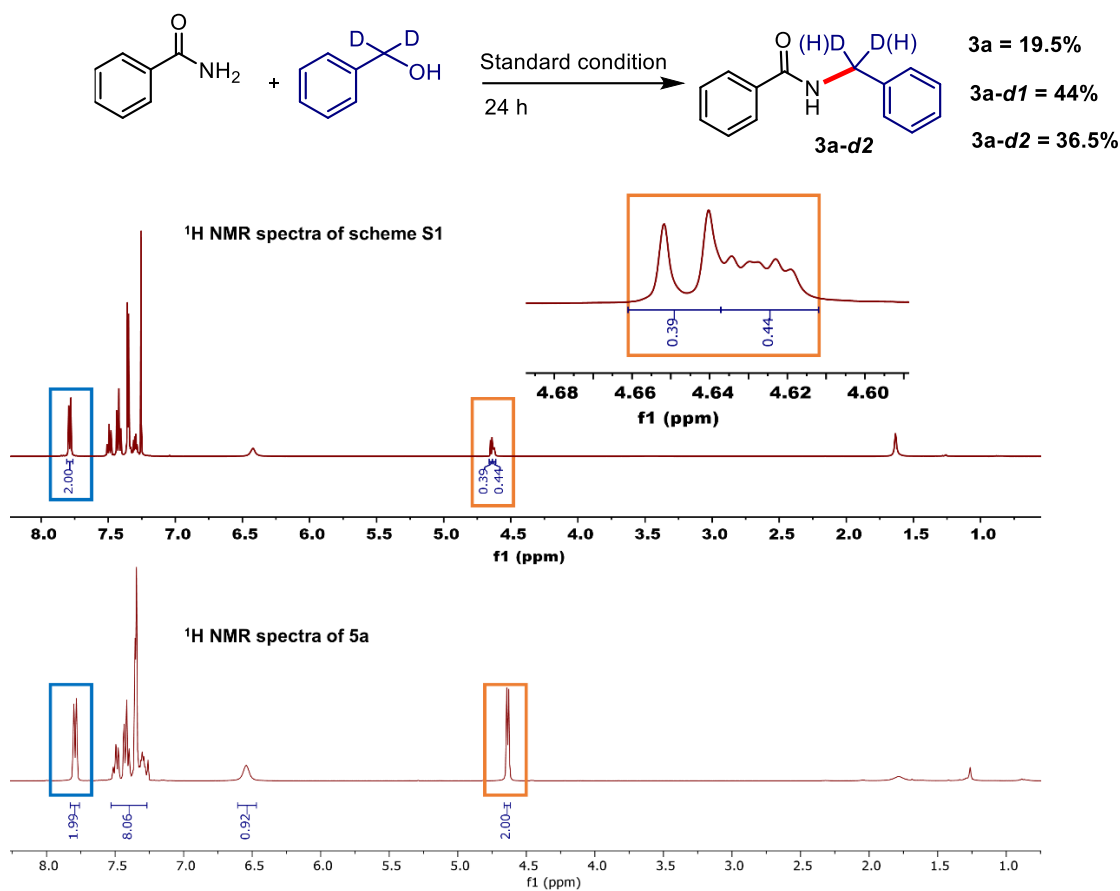

**Figure S1.** Deuterium labelling experiment.

Product distribution by <sup>1</sup>H NMR integration

|                  | <b>5a + 5a-d<sub>1</sub></b>  | <b>5a</b>                     | <b>5a-d<sub>1</sub></b>       | <b>5a-d<sub>2</sub></b> |
|------------------|-------------------------------|-------------------------------|-------------------------------|-------------------------|
| Signal $\delta$  | 7.79 [ <i>ortho</i> -H, (2H)] | 4.65 [ <i>benzyl</i> -H (2H)] | 4.63 [ <i>benzyl</i> -H (1H)] | -                       |
| Integral Value   | 2.00                          | 0.39/2                        | 0.44                          |                         |
| Calculated ratio | -                             | <b>19.5%</b>                  | <b>44%</b>                    | <b>36.5%</b>            |

**General procedure for the ESI-MS analysis of reaction mixture.** An oven dried Schlenk tube was charged with the catalyst **2c** (6.8 mg, 2 mol%), dppe (8.0 mg, 4 mol%), benzamide (0.5 mmol), benzyl alcohol (1.0 mmol), and KO<sup>t</sup>Bu (0.125 mmol) followed by *t*-amyl alcohol (1 mL). The reaction tube was then kept in oil bath (bath temperature 130 °C) and heated for 1 h. After that all volatiles were dried in high vacuum and the sample for ESI-MS analysis was prepared in CH<sub>3</sub>CN.

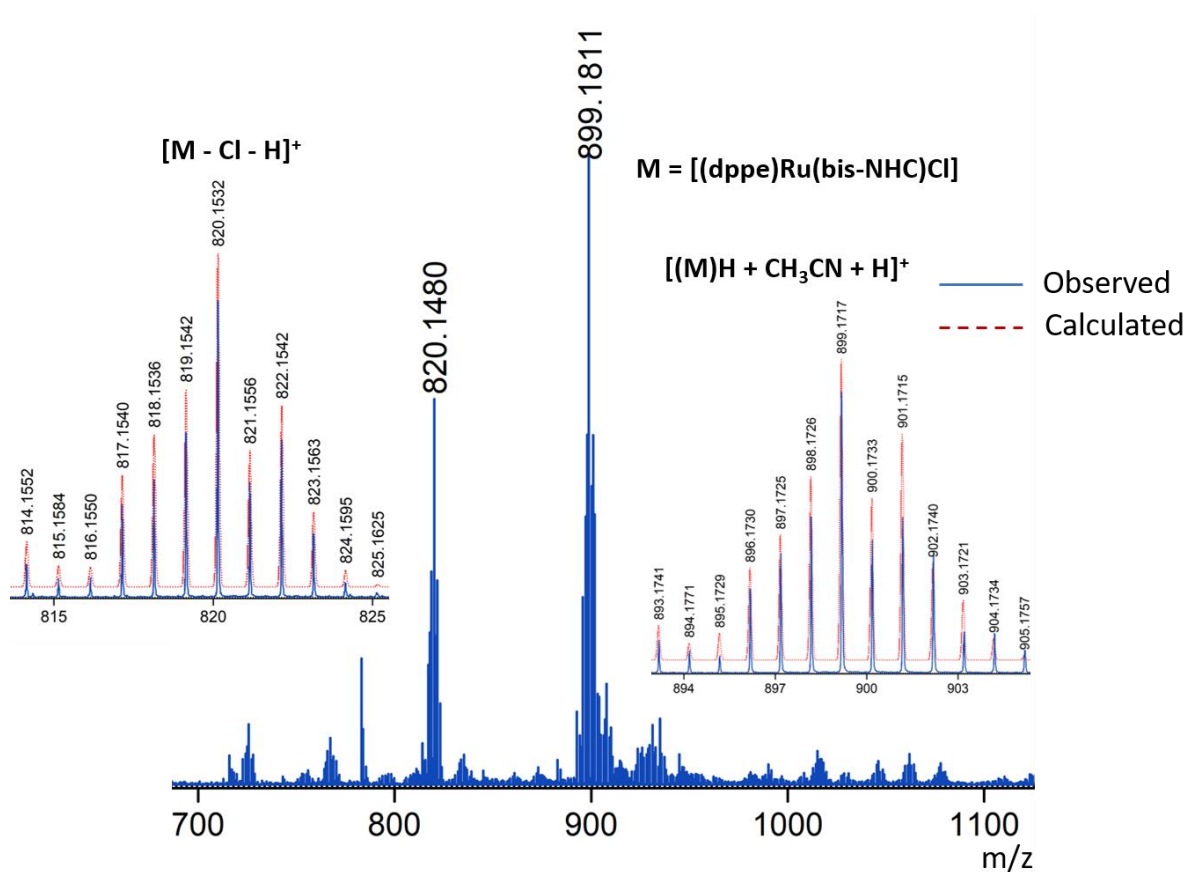

**Figure S2.** ESI-MS of a reaction mixture under standard condition.

### General procedure for the generation of hydride species:

An oven dried Schlenk tube was charged with the catalyst **2c** (15 mg, 0.0229 mmol), dppe (18.2 mg, 0.0458 mmol), benzyl alcohol (24  $\mu$ l, 0.229 mmol, 10 equiv w.r.t **2c**), and KO<sup>t</sup>Bu (26 mg, 0.229 mmol, 10 equiv w.r.t **2c**) followed by *t*-amyl alcohol (1 mL). The reaction tube was then kept in oil bath (bath temperature 130 °C) and heated for 2 h. After that all the volatiles were dried in high vacuum and <sup>1</sup>H NMR and <sup>31</sup>P NMR were recorded in CD<sub>3</sub>CN. The same sample was also submitted for ESI-MS analysis.

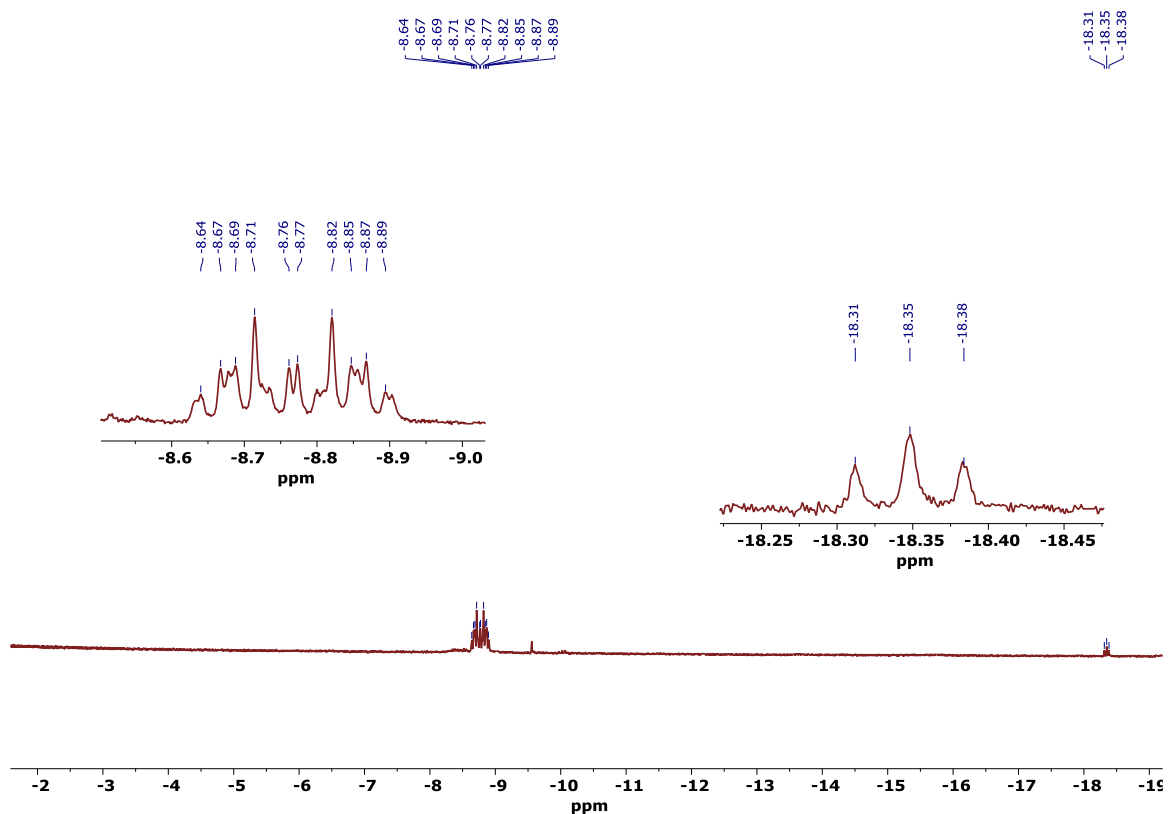

**Figure S3.** Selected region of the  $^1\text{H}$  NMR spectrum of metal hydride species generated from benzyl alcohol dehydrogenation.

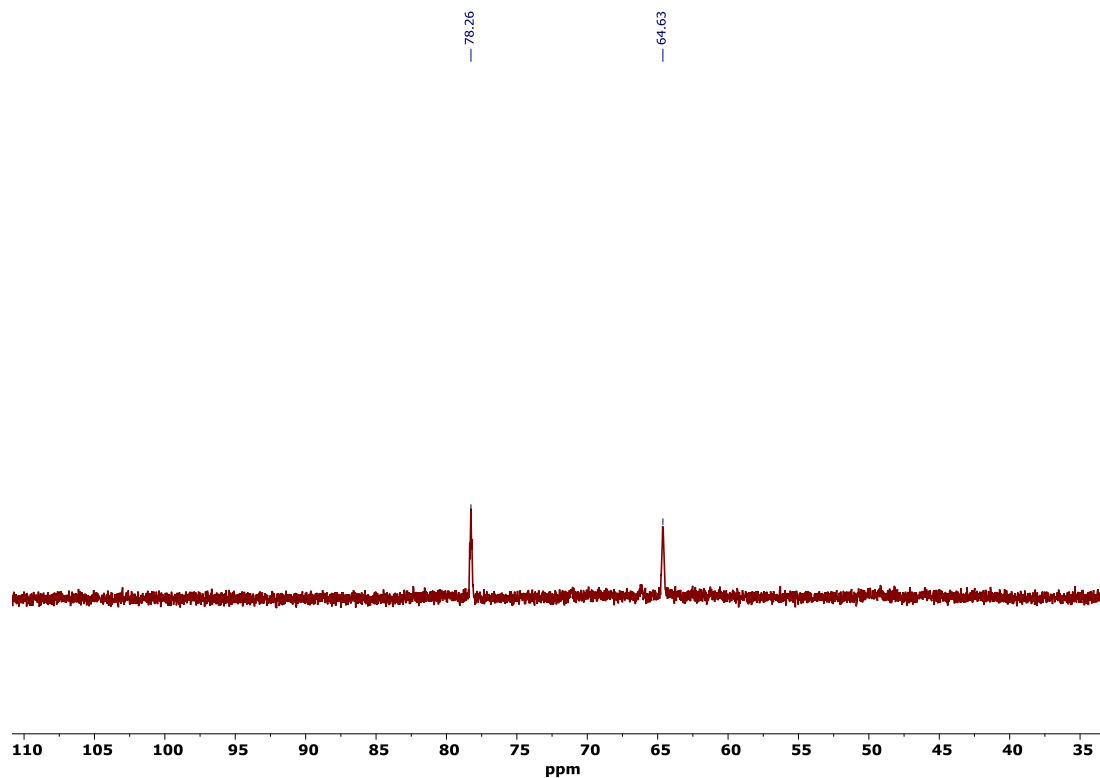

**Figure S4.**  $^{31}\text{P}\{^1\text{H}\}$  NMR spectrum of metal hydride species generated from benzyl alcohol dehydrogenation.

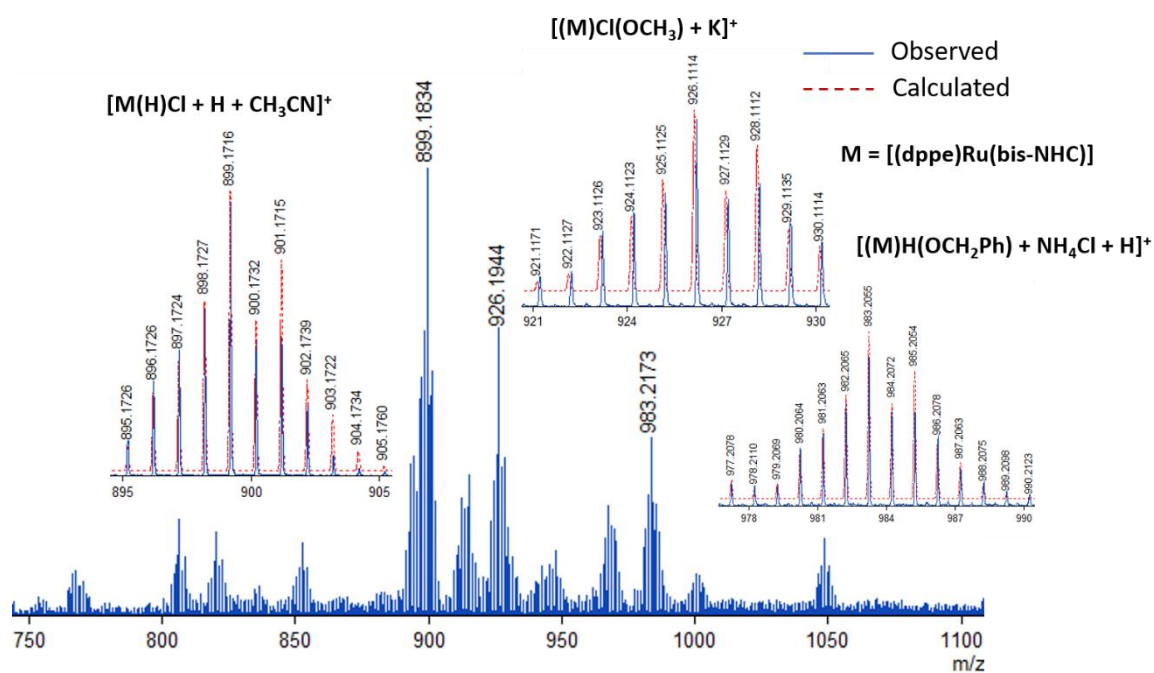

**Figure S5.** ESI-MS spectrum of benzyl alcohol dehydrogenation reaction.

### Kinetic isotopic effect

Two separate oven dried Schlenk tubes were charged with the catalyst (**2c**) (0.5 mol%), dppe (1 mol%), amide (0.5 mmol), and KO<sup>t</sup>Bu (0.125 mmol) followed by *t*-amyl alcohol (1 mL). To this benzyl alcohol **4a** (1 mmol) in one tube and deuterated benzyl alcohol **4a-d<sub>2</sub>** in another tube were added. The reaction tube was then kept in oil bath (bath temperature 130 °C) and heated for 2 h. Then reaction mixture was cooled to room temperature and the formation of respective products were analysed by GC-MS using dodecane as an internal standard which provides KIE value  $k_H/k_D = 13/5 = 2.6$ .

## Reaction progress and temperature effect

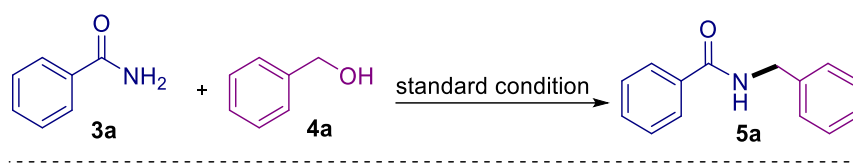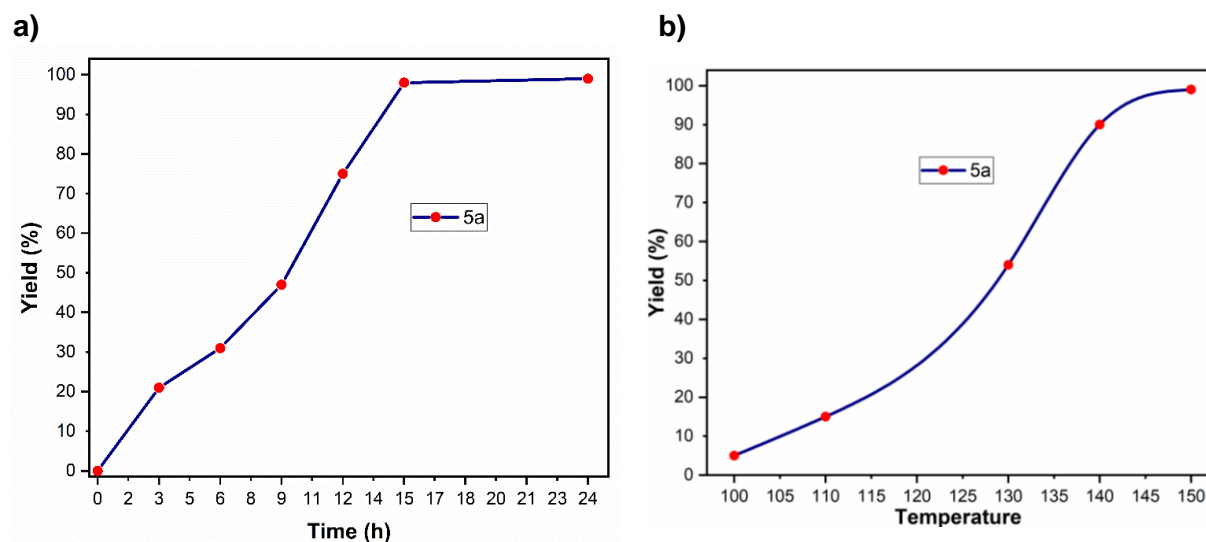

**Figure S6.** (a) Reaction progress for the formation of product **5a**; (b) Temperature effect on the formation of product **5a**.

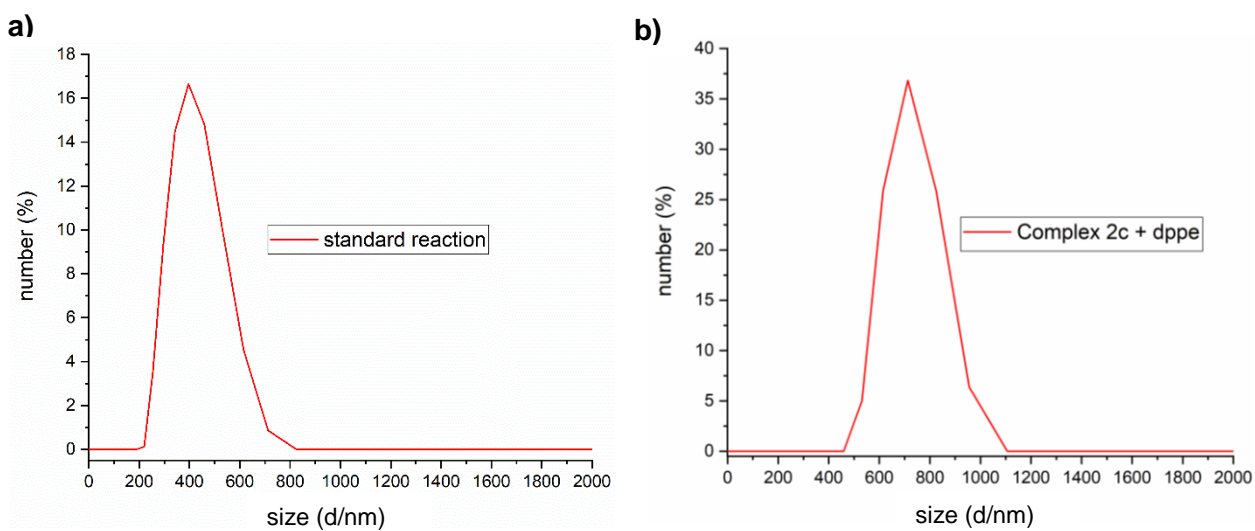

**Figure S7.** DLS plot for (a) the standard reaction mixture; (b) reaction mixture containing the complex **2c** and dppe.



## References

1. S. N. R. Donthireddy, P. M. Illam and A. Rit, *Inorg. Chem.*, 2020, **59**, 1835-1847.
2. (a) P. M. Illam, V. K. Singh, Priya and A. Rit, *J. Organomet. Chem.*, 2021, **951**, 122008-122016. (b) P. M. Illam and A. Rit, *Catal. Sci. Technol.*, 2022, **12**, 67-74.
